# Supplementary material for: Diversity and Distribution of Mites (ACARI) Revealed by Contamination Survey in Public Genomic Databases
Source: MDPI journal article supplement (doi:10.3390/ani13203172), 2023-10-11
Supplement: s1 [file s1]

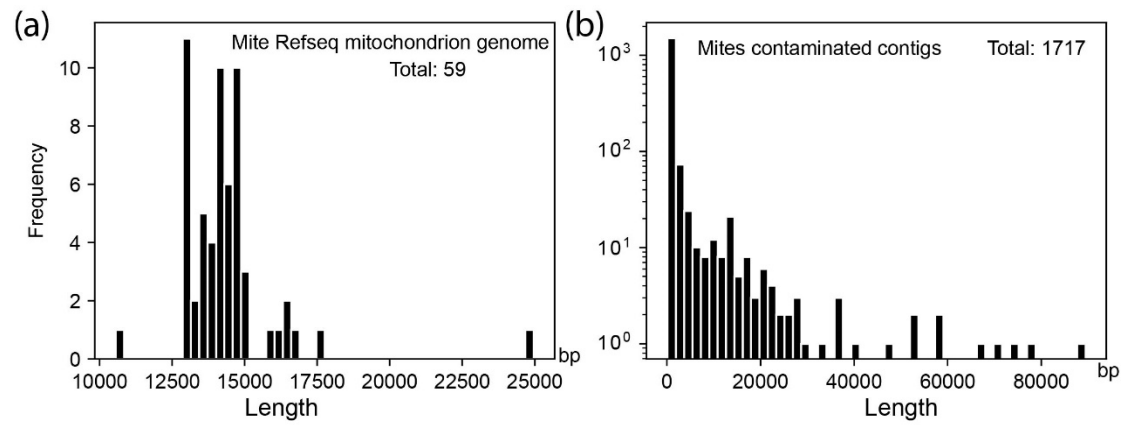

**Figure S1.** Length distribution of (a) 59 mitochondrion genomes of mites in Refseq database, and (b) 1717 mite contaminated contigs in Genbank WGS/TSA database detected in this study.

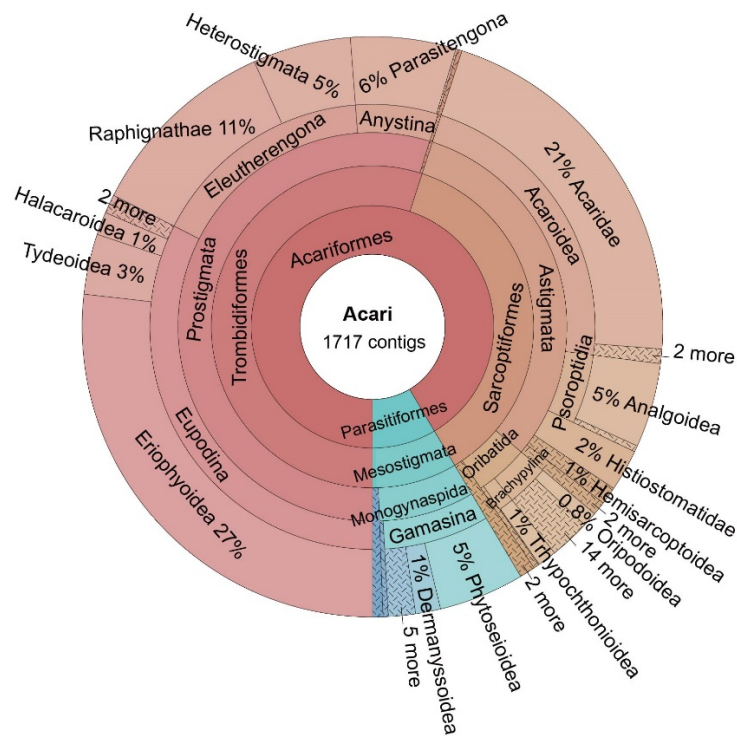

**Figure S2.** Relative abundance of mite contaminated contigs at various Acari taxonomic levels detected in Genbank WGS/TSA database.

**Table S1.** List of protein sequences retrieved from Genbank for the phylogenetic analysis.

| Species                                 | Hyporder/<br>Suborder/<br>Infraorder | Superfamily       | Family            | Accession      |
|-----------------------------------------|--------------------------------------|-------------------|-------------------|----------------|
| <i>Hygrobat</i> <i>longiporus</i>       | Anystina                             | Hygrobatoidea     | Hygrobatidae      | YP_009866786.1 |
| <i>Sperchon</i> <i>plumifer</i>         | Anystina                             | Sperchontoidea    | Sperchontidae     | YP_009535749.1 |
| <i>Unionicola</i> <i>parkeri</i>        | Anystina                             | Hygrobatoidea     | Unionicolidae     | YP_004021457.1 |
| <i>Walchia</i> <i>hayashii</i>          | Anystina                             | Trombiculoidea    | Trombiculidae     | YP_001837111.1 |
| <i>Trombidiidae</i> sp. BIOUG18253-A07  | Anystina                             | Trombidoidea      | Trombidiidae      | AWS19674.1     |
| <i>Stegodyphus</i> <i>mimosarum</i>     | Araneomorphae                        | Eresoidea         | Eresidae          | ABJ96298.1     |
| <i>Lepidoglyphus</i> <i>destructor</i>  | Astigmata                            | Glycyphagoidea    | Glycyphagidae     | YP_010354348.1 |
| <i>Blomia</i> <i>tropicalis</i>         | Astigmata                            | Glycyphagoidea    | Echimyopodidae    | YP_010354335.1 |
| <i>Carpoglyphus</i> <i>lactis</i>       | Astigmata                            | Hemisarcoptoidea  | Carpoglyphidae    | YP_009862148.1 |
| <i>Trouessartia</i> <i>rubecula</i>     | Astigmata                            | Analgoidea        | Trouessartiidae   | YP_009560912.1 |
| <i>Histiostoma</i> <i>feroniarum</i>    | Astigmata                            | Histiostomatoidea | Histiostomatidae  | YP_009504242.1 |
| <i>Rhizoglyphus</i> <i>robinii</i>      | Astigmata                            | Acaroidea         | Acaridae          | YP_009498332.1 |
| <i>Histiostoma</i> <i>blomquisti</i>    | Astigmata                            | Histiostomatoidea | Histiostomatidae  | YP_009306839.1 |
| <i>Tyrophagus</i> <i>putrescentiae</i>  | Astigmata                            | Acaroidea         | Acaridae          | YP_009114537.1 |
| <i>Aleuroglyphus</i> <i>ovatus</i>      | Astigmata                            | Acaroidea         | Acaridae          | YP_009019414.1 |
| <i>Dermatophagoides</i> <i>farinae</i>  | Astigmata                            | Analgoidea        | Pyroglyphidae     | YP_003162772.1 |
| <i>Ovanoetus</i> sp. AD678              | Astigmata                            | Histiostomatoidea | Histiostomatidae  | ATY50495.1     |
| <i>Chaetodactylus</i> <i>krombeini</i>  | Astigmata                            | Hemisarcoptoidea  | Chaetodactylidae  | ATY50504.1     |
| <i>Crabrovidia</i> sp. AD610            | Astigmata                            | Hemisarcoptoidea  | Winterschmidtidae | ATY50500.1     |
| <i>Ingrassia</i> <i>philomachi</i>      | Astigmata                            | Analgoidea        | Xolalgidae        | AOO33910.1     |
| <i>Hyadesia</i> <i>curassaviensis</i>   | Astigmata                            | Hemisarcoptoidea  | Hyadesiidae       | ATY50501.1     |
| <i>Vidia</i> sp. AD452                  | Astigmata                            | Hemisarcoptoidea  | Winterschmidtidae | ATY50499.1     |
| <i>Congovidia</i> sp. AD699             | Astigmata                            | Hemisarcoptoidea  | Hemisarcoptidae   | ATY50496.1     |
| <i>Fusohiercia</i> <i>lawrencei</i>     | Astigmata                            | Hemisarcoptoidea  | Algophagidae      | ATY50503.1     |
| <i>Tyrophagus</i> <i>fanetzhangorum</i> | Astigmata                            | Acaroidea         | Acaridae          | AVX48499.1     |
| <i>Picidectes</i> <i>chapini</i>        | Astigmata                            | Hypoderatoidea    | Hypoderatidae     | UJR87502.1     |
| <i>Oribatula</i> <i>sakamorii</i>       | Brachypylina                         | Oripodoidea       | Oribatulidae      | QYF07803.1     |
| <i>Oribatula</i> sp. XFX                | Brachypylina                         | Oripodoidea       | Oribatulidae      | QFG71641.1     |
| <i>Eueremaeus</i> <i>valkanovi</i>      | Brachypylina                         | Eremaeidea        | Eremaeidae        | WFK33970.1     |
| <i>Demodex</i> <i>folliculorum</i>      | Eleutherengona                       | Cheyletoidea      | Demodicidae       | YP_009114835.1 |
| <i>Tetranychus</i> <i>pueraricola</i>   | Eleutherengona                       | Tetranychidea     | Tetranychidae     | YP_009051530.1 |
| <i>Tetranychus</i> <i>phaselus</i>      | Eleutherengona                       | Tetranychidea     | Tetranychidae     | YP_009051517.1 |
| <i>Tarsonemidae</i> gen. sp. AD1063     | Eleutherengona                       | Tarsonemoidea     | Tarsonemidae      | ATY50430.1     |
| <i>Trochometridium</i> sp. AD1884       | Eleutherengona                       | Pyemotoidea       | Trochometridiidae | ATY50433.1     |
| <i>Agistemus</i> <i>gratus</i>          | Eleutherengona                       | Raphignathoidea   | Stigmaeidae       | WAK43286.1     |
| <i>Tarsocheyleidae</i> gen. sp. AD1095  | Eleutherengona                       | Tarsocheyleidea   | Tarsocheyleidae   | ATY50428.1     |
| <i>Podapolipus</i> <i>luzoni</i>        | Eleutherengona                       | Tarsonemoidea     | Podapolipidae     | ARI47195.1     |
| <i>Brevipalpus</i> <i>lewisi</i>        | Eleutherengona                       | Tetranychidea     | Tenuipalpidae     | QAU55254.1     |
| <i>Pygmephoridae</i> sp. BIOUG24576-E03 | Eleutherengona                       | Pygmephoridea     | Pygmephoridae     | AYN51884.1     |
| <i>Tarsonemidae</i> sp. BOLD: AAZ5832   | Eleutherengona                       | Tarsonemoidea     | Tarsonemidae      | AFW14558.1     |

|                                          |                |                 |                 |                |
|------------------------------------------|----------------|-----------------|-----------------|----------------|
| <i>Tenuipalpus</i> sp. AD1957            | Eleutherengona | Tetranychoida   | Tenuipalpidae   | ATY50462.1     |
| <i>Hypochthonius rufulus</i>             | Enarthronota   | Hypochthonoidea | Hypochthoniidae | UYZ39297.1     |
| <i>Halotydeus destructor</i>             | Eupodina       | Eupodoidea      | Penthaleidae    | YP_010385508.1 |
| <i>Spinibdella lignicola</i>             | Eupodina       | Bdelloidea      | Bdellidae       | YP_010516613.1 |
| <i>Rhinotergum shaoguanense</i>          | Eupodina       | Eriophyoidea    | Diptilomiopidae | YP_009351807.1 |
| <i>Phyllocoptes taishanensis</i>         | Eupodina       | Eriophyoidea    | Eriophyidae     | YP_009228533.1 |
| <i>Epitrimerus sabinae</i>               | Eupodina       | Eriophyoidea    | Eriophyidae     | YP_009228520.1 |
| <i>Agauopsis itassussensis</i>           | Eupodina       | Halacaroida     | Halacaridae     | UJR87586.1     |
| <i>Triophytydeus</i> sp. BOLD:ADF3063    | Eupodina       | Tydeoidea       | Triophytydeidae | QGW41996.1     |
| <i>Aculodes holcusi</i>                  | Eupodina       | Eriophyoidea    | Eriophyidae     | QQK89385.1     |
| <i>Setoptus pini</i>                     | Eupodina       | Eriophyoidea    | Phytoptidae     | QHB50645.1     |
| <i>Anthocoptes recki</i>                 | Eupodina       | Eriophyoidea    | Eriophyidae     | QQK89387.1     |
| <i>Trisetacus silvestris</i>             | Eupodina       | Eriophyoidea    | Phytoptidae     | QHB50694.1     |
| <i>Bdellidae</i> sp. BIOUG25925-B12      | Eupodina       | Bdelloidea      | Bdellidae       | AYN51502.1     |
| <i>Stereotydeus</i> sp. IDH-2006a        | Eupodina       | Eupodoidea      | Penthalodidae   | ABD17886.1     |
| <i>Aceria</i> sp. A PEC-2023a            | Eupodina       | Eriophyoidea    | Eriophyidae     | WIW35252.1     |
| <i>Tydeidae</i> sp. BOLD:ACY2916         | Eupodina       | Tydeoidea       | Tydeidae        | QQQ51928.1     |
| <i>Tydeidae</i> sp. BIOUG27249-E04       | Eupodina       | Tydeoidea       | Tydeidae        | AWK31052.1     |
| <i>Aceria</i> sp. 1 DOJ-2017             | Eupodina       | Eriophyoidea    | Eriophyidae     | ASO96446.1     |
| <i>Shevtchenkella serrata</i>            | Eupodina       | Eriophyoidea    | Eriophyidae     | UCS82606.1     |
| <i>Parasitus fimetorum</i>               | Gamasina       | Parasitoidea    | Parasitidae     | YP_010321832.1 |
| <i>Neoseiulus californicus</i>           | Gamasina       | Phytoseioidea   | Phytoseiidae    | YP_010584664.1 |
| <i>Dermanyssus gallinae</i>              | Gamasina       | Dermanyssoidea  | Dermanyssidae   | YP_010045993.1 |
| <i>Hypoaspis linteyini</i>               | Gamasina       | Dermanyssoidea  | Laelapidae      | YP_009731531.1 |
| <i>Blattisocius tarsalis</i>             | Gamasina       | Phytoseioidea   | Blattisociidae  | YP_009731518.1 |
| <i>Macrocheles muscaedomesticae</i>      | Gamasina       | Eviphidoidea    | Macrochelidae   | YP_009731505.1 |
| <i>Varroa destructor</i>                 | Gamasina       | Dermanyssoidea  | Varroidae       | NP_758874.1    |
| <i>Galendromus occidentalis</i>          | Gamasina       | Phytoseioidea   | Phytoseiidae    | YP_001096000.1 |
| <i>Digamasellidae</i> sp. BOLD:ACJ4515   | Gamasina       | Rhodacaroida    | Digamasellidae  | ALS53963.1     |
| <i>Echinolaelaps echidninus</i>          | Gamasina       | Dermanyssoidea  | Laelapidae      | WHL46305.1     |
| <i>Transeius volgini</i>                 | Gamasina       | Phytoseioidea   | Phytoseiidae    | QPZ18645.1     |
| <i>Phytoseiulus persimilis</i>           | Gamasina       | Phytoseioidea   | Phytoseiidae    | ACS15261.1     |
| <i>Euseius nicholsi</i>                  | Gamasina       | Phytoseioidea   | Phytoseiidae    | AGX31987.1     |
| <i>Blattisociidae</i> sp. BIOUG30402-A10 | Gamasina       | Phytoseioidea   | Blattisociidae  | AYK98228.1     |
| <i>Steganacarus magnus</i>               | Mixonomata     | Phthiracaroida  | Steganacaridae  | YP_002317272.1 |
| <i>Trichouropoda</i> sp. n. 10WK         | Uropodina      |                 | Trematuridae    | AEW49442.1     |
| <i>Ixodes scapularis</i>                 |                | Ixodoidea       | Ixodidae        | YP_010535455.1 |
| <i>Rhipicephalus microplus</i>           |                | Ixodoidea       | Ixodidae        | YP_008999527.1 |
| <i>Mesobuthus martensii</i>              |                | Buthoidea       | Buthidae        | YP_001427343.1 |

**Table S2.** Contaminations of family Demodicidae. 12 Contigs in red fonts with identities more than 96% are supposed to be artificial contaminations of human *Demodex* mites. The other 2 contigs (GGWL01055778.1 and GGWL01055779.1) from black howler monkey assembly (GGWL01) with identities less than 91.4% were not assigned to family level.

| CONTIG<br>ACCESSION | CONTIG<br>LENGTH | ASSEMBLY<br>HOST | BEST BLAST<br>SUBJECT | IDENTITY | BLAST<br>LENGTH | SUBJECT DESCRIPTION                                                                                               |
|---------------------|------------------|------------------|-----------------------|----------|-----------------|-------------------------------------------------------------------------------------------------------------------|
| GGWL01055778.1      | 1519             | Mammalia         | KM114226.1            | 83.433   | 1509            | Demodex folliculorum<br>mitochondrion, complete<br>genome                                                         |
| GGWL01055779.1      | 302              | Mammalia         | OP900959.1            | 88.889   | 297             | Demodex melesinus<br>isolate SB11 cytochrome<br>c oxidase subunit I<br>(COX1) gene, partial cds;<br>mitochondrial |
| JAODFX010125061.1   | 248              | Insecta          | KM114225.1            | 100      | 248             | Demodex brevis<br>mitochondrion, complete<br>genome                                                               |
| HBDQ01152762.1      | 1190             | Bivalvia         | KM114226.1            | 96.057   | 989             | Demodex folliculorum<br>mitochondrion, complete<br>genome                                                         |
| GHHL01022903.1      | 325              | Arachnida        |                       | 100      | 325             |                                                                                                                   |
| GHHL01022904.1      | 360              | Arachnida        |                       | 96       | 350             |                                                                                                                   |
|                     | 360              | Arachnida        |                       | 100      | 58              | Demodex folliculorum                                                                                              |
| GHHL01022905.1      | 325              | Arachnida        |                       | 100      | 246             | voucher UMMZ BMOC                                                                                                 |
|                     | 325              | Arachnida        | KY922187.1            | 100      | 86              | 07-0815-005 AD1011                                                                                                |
| GHHL01034003.1      | 226              | Arachnida        |                       | 100      | 148             | 18S ribosomal RNA gene,                                                                                           |
|                     | 226              | Arachnida        |                       | 100      | 82              | partial sequence                                                                                                  |
| GHHL01034004.1      | 208              | Arachnida        |                       | 100      | 167             |                                                                                                                   |
|                     | 208              | Arachnida        |                       | 98       | 50              |                                                                                                                   |
| GHHL01075817.1      | 231              | Arachnida        |                       | 98.701   | 231             | Demodex folliculorum                                                                                              |
| GHHL01075818.1      | 218              | Arachnida        |                       | 98.165   | 218             | voucher UMMZ BMOC                                                                                                 |
| GKBK01103287.1      | 296              | Insecta          | KY922058.1            | 98.986   | 296             | 07-0815-005 AD1011                                                                                                |
| HBDQ01066108.1      | 346              | Bivalvia         |                       | 98.83    | 342             | 28S ribosomal RNA gene,<br>partial sequence                                                                       |
| GKEF01806478.1      | 228              | Actinopteri      | MH540325.1            | 100      | 200             | Demodex brevis isolate<br>D3-1 28S ribosomal RNA<br>gene, partial sequence                                        |

**Table S3.** Contaminations related to the order Sarcoptiformes in fish (Actinopteri) assemblies. Contaminated contigs were blasted against Genbank nt database, the best score hits were listed in the table.

| CONTAMINATED<br>CONTIG ACCESSION | ASSEMBLY HOST                  | BEST BLAST<br>SUBJECT | IDENTITY | BLAST<br>LENGTH | SUBJECT Family   |
|----------------------------------|--------------------------------|-----------------------|----------|-----------------|------------------|
| JAODHT010034050.1                | <i>Nemapteryx augusta</i>      | KY922458.1            | 99.649   | 285             | Haplochthoniidae |
| GDHT01210928.1                   | <i>Austrofundulus limnaeus</i> | JQ000249.1            | 100      | 224             |                  |
| HALZ01069874.1                   | <i>Sardina pilchardus</i>      | XR_006959345.1        | 95.11    | 409             |                  |
| HAMA01003558.1                   | <i>Sardina pilchardus</i>      | XR_003474832.1        | 99.153   | 236             | Pyroglyphidae    |
| HAMB01025712.1                   | <i>Sardina pilchardus</i>      | XR_006959345.1        | 97.835   | 231             |                  |
| HBV01088761.1                    | <i>Platichthys flesus</i>      | XR_006959345.1        | 100      | 205             |                  |
| GIAU01075596.1                   | <i>Lucifuga dentata</i>        | JQ000367.1            | 96.226   | 318             | Histiostomatidae |
| GFMN01017841.1                   | <i>Chionodraco hamatus</i>     | MN857506.1            | 99.62    | 526             |                  |
| GIAU01155259.1                   | <i>Lucifuga dentata</i>        | MN857505.1            | 100      | 246             |                  |
| GIAU01165557.1                   | <i>Lucifuga dentata</i>        | MN857506.1            | 98.529   | 408             |                  |
| GIAU01192799.1                   | <i>Lucifuga dentata</i>        | KM277806.1            | 98.026   | 304             |                  |
| GIAU01192800.1                   | <i>Lucifuga dentata</i>        | KM277806.1            | 96.711   | 304             |                  |
| GIAU01202434.1                   | <i>Lucifuga dentata</i>        | MN857506.1            | 100      | 254             |                  |
| GIAU01367655.1                   | <i>Lucifuga dentata</i>        | KM277818.1            | 99.694   | 327             |                  |
| GIAU01367663.1                   | <i>Lucifuga dentata</i>        | KM277818.1            | 96.697   | 333             |                  |
| GIAU01399740.1                   | <i>Lucifuga dentata</i>        | MK393792.1            | 100      | 206             | Acaridae         |
| GIAU01472509.1                   | <i>Lucifuga dentata</i>        | MN857505.1            | 99.526   | 211             |                  |
| GJOL01045947.1                   | <i>Cotylopus acutipinnis</i>   | KM277806.1            | 99.825   | 570             |                  |
| GKAU01101372.1                   | <i>Tenualosa ilisha</i>        | MN857505.1            | 99.231   | 260             |                  |
| HANK010104528.1                  | <i>Pleuronectes platessa</i>   | KM277817.1            | 100      | 251             |                  |
| HANK010201860.1                  | <i>Pleuronectes platessa</i>   | KM277818.1            | 100      | 342             |                  |
| HANK010573285.1                  | <i>Pleuronectes platessa</i>   | KM277818.1            | 92.857   | 266             |                  |
| HANK010592382.1                  | <i>Pleuronectes platessa</i>   | MN857506.1            | 99.82    | 1114            |                  |
| HANK010592383.1                  | <i>Pleuronectes platessa</i>   | MN857506.1            | 100      | 548             |                  |
