# Supplementary material for: Diversity and Distribution of Mites (ACARI) Revealed by Contamination Survey in Public Genomic Databases
Source: MDPI journal article supplement (doi:10.3390/ani13203172), 2023-10-11
Supplement: s1 [file WGS & TSA assembly info.xlsx]

## Sheet: WGS & TSA assembly info
Species	taxid	contigs_total_length	contigs_count	prefix_s	project_s	div_s	update time
(Agave angustifolia x Agave amaniensis) x Agave amaniensis	2056234	21007360	25063	GJKJ01	TSA	PLN	2022-10-31T00:00:00Z
Aaroniella sp. AD-2014	1585309	23636796	27147	GDEY01	TSA	INV	2018-11-30T00:00:00Z
Abdopus aculeatus	515833	19680	25	GAGI01	TSA	INV	2013-04-08T00:00:00Z
Abies balsamea	90345	63280253	46051	GGJG01	TSA	PLN	2019-04-18T00:00:00Z
Abies pinsapo	56046	107486680	97634	GCZN01	TSA	PLN	2017-07-05T00:00:00Z
Abisara bifasciata	2614024	332741916	754990	DWAB01	WGS	INV	2022-02-17T00:00:00Z
Ablemma shimojanai	2337276	83569679	53995	IAFB01	TSA	INV	2022-11-17T00:00:00Z
Abramis brama	38527	1067396354	66	JAKJNB01	WGS	VRT	2022-04-08T00:00:00Z
Abramis brama	38527	807598560	3047	JAKJNC01	WGS	VRT	2022-04-06T00:00:00Z
Abrosoma johorense	1661800	23180608	43371	GDWZ01	TSA	INV	2019-09-03T00:00:00Z
Abrostola tripartita	938171	30084	1	CAJPHX01	WGS	INV	2021-03-19T00:00:00Z
Abrostola tripartita	938171	377898841	276	CAJPIA01	WGS	INV	2021-03-19T00:00:00Z
Abrostola triplasia	254365	131995	4	CAMIUI01	WGS	INV	2022-09-02T00:00:00Z
Abrostola triplasia	254365	360541132	163	CAMIUJ01	WGS	INV	2022-09-02T00:00:00Z
Abrothrix hirta	1615796	68133651	64103	GCHF01	TSA	ROD	2016-01-14T00:00:00Z
Abrothrix hirta	1615796	61103698	56789	GCHG01	TSA	ROD	2016-01-14T00:00:00Z
Abrothrix hirta	1615796	73593054	72671	GCHH01	TSA	ROD	2016-01-14T00:00:00Z
Abrothrix hirta	1615796	24817524	35800	GCHI01	TSA	ROD	2016-01-15T00:00:00Z
Abrothrix hirta	1615796	74757284	69575	GCHK01	TSA	ROD	2016-01-15T00:00:00Z
Abrothrix hirta	1615796	68490590	65904	GCHL01	TSA	ROD	2016-01-15T00:00:00Z
Abrothrix hirta	1615796	81667726	75973	GCHM01	TSA	ROD	2016-01-15T00:00:00Z
Abrothrix hirta	1615796	99089964	76321	GCHN01	TSA	ROD	2016-01-26T00:00:00Z
Abrothrix hirta	1615796	56991179	53343	GCIC01	TSA	ROD	2016-01-26T00:00:00Z
Abrothrix hirta	1615796	36816058	44306	GCIR01	TSA	ROD	2016-01-15T00:00:00Z
Abrothrix hirta	1615796	93280009	77514	GCIS01	TSA	ROD	2016-01-15T00:00:00Z
Abrothrix hirta	1615796	30584600	38416	GCJD01	TSA	ROD	2016-01-26T00:00:00Z
Abrothrix hirta	1615796	73254843	69799	GCJE01	TSA	ROD	2016-01-26T00:00:00Z
Abrothrix hirta	1615796	93224128	71666	GCJH01	TSA	ROD	2016-01-15T00:00:00Z
Abrothrix hirta	1615796	48950179	54701	GCJI01	TSA	ROD	2016-01-14T00:00:00Z
Abrothrix hirta	1615796	89439823	79026	GCJK01	TSA	ROD	2016-01-26T00:00:00Z
Abrus precatorius	3816	347230236	160	QYUI01	WGS	PLN	2018-12-11T00:00:00Z
Abrus pulchellus subsp. cantoniensis	858909	381267853	29	JALDQU01	WGS	PLN	2022-06-02T00:00:00Z
Abrus pulchellus subsp. cantoniensis	858909	381267853	29	JAKRVW01	WGS	PLN	2022-07-06T00:00:00Z
Abscondita terminalis	2069292	499652588	3187	JABVZW01	WGS	INV	2020-06-23T00:00:00Z
Abyssocucumis albatrossi	1777472	41895303	106265	GECE01	TSA	INV	2016-01-28T00:00:00Z
Acacesia hamata	2337721	47066964	38707	IBYK01	TSA	INV	2022-11-17T00:00:00Z
Acacia acuminata	178749	880086908	633	JAFJYI01	WGS	PLN	2021-06-24T00:00:00Z
Acacia crassicarpa	499986	72413021	41714	ICSL01	TSA	PLN	2022-05-10T00:00:00Z
Acacia koa	468172	53302741	81070	GBYE01	TSA	PLN	2015-07-28T00:00:00Z
Acacia melanoxylon	138028	749107765	188	JAFJYJ01	WGS	PLN	2021-06-24T00:00:00Z
Acacia pycnantha	880440	815414690	1272	JAMWYP01	WGS	PLN	2022-10-06T00:00:00Z
Acalymma vittatum	133117	384935582	621852	GHXO01	TSA	INV	2020-09-23T00:00:00Z
Acalypha hispida	197604	2162788961	3186098	CANXYA01	WGS	PLN	2023-04-03T00:00:00Z
Acanalonia conica	1585284	78405065	110708	GCXC01	TSA	INV	2018-11-30T00:00:00Z
Acanthaeschna victoria	1566323	24204079	49950	GCKG01	TSA	INV	2022-03-09T00:00:00Z
Acanthaster planci	133434	385630944	3552	BLZC01	WGS	INV	2021-07-31T00:00:00Z
Acanthaster planci	133434	400438766	3642	BLZE01	WGS	INV	2021-07-31T00:00:00Z
Acanthaster planci	133434	420016408	4526	BNHI01	WGS	INV	2022-10-13T00:00:00Z
Acanthaster planci	133434	2536427	83	BBNW01	WGS	INV	2015-02-17T00:00:00Z
Acanthaster planci	133434	373974631	18088	BDGF01	WGS	INV	2016-12-17T00:00:00Z
Acanthaster planci	133434	373479500	19917	BDGH01	WGS	INV	2016-12-17T00:00:00Z
Acanthepeira sp. IDV 3791	2337277	39760878	37253	IAFO01	TSA	INV	2022-11-17T00:00:00Z
Acanthis flammea	54769	47602457	30357	GBIK01	TSA	VRT	2015-08-03T00:00:00Z
Acanthis hornemanni	90719	47602457	30357	GBIN01	TSA	VRT	2015-08-03T00:00:00Z
Acanthisitta chloris	57068	1031098396	120312	JJRS01	WGS	VRT	2016-11-17T00:00:00Z
Acanthisitta chloris	57068	1077387582	206	JAFCHQ01	WGS	VRT	2021-02-17T00:00:00Z
Acanthisitta chloris	57068	827793803	2879	JAFCHR01	WGS	VRT	2021-02-10T00:00:00Z
Acanthobdella peledina	60939	104812863	145171	GIWE01	TSA	INV	2022-08-30T00:00:00Z
Acanthocasuarina muellerianae	1323547	32316342	42879	GAYY02	TSA	INV	2018-11-30T00:00:00Z
Acanthochaenus luetkenii	473344	545759480	91087	OMOT01	WGS	VRT	2018-03-09T00:00:00Z
Acanthocheilonema viteae	6277	77350906	6796	UPTC01	WGS	INV	2018-11-09T00:00:00Z
Acanthochitona crinita	126420	33268158	31151	GJJB01	TSA	INV	2021-09-17T00:00:00Z
Acanthochitona fascicularis	55704	31056827	27660	GJAX01	TSA	INV	2021-03-16T00:00:00Z
Acanthochlamys bracteata	145231	197965679	821	JAFKAK01	WGS	PLN	2021-09-09T00:00:00Z
Acanthochromis polyacanthus	80966	991584656	30414	MVNR01	WGS	VRT	2017-04-25T00:00:00Z
Acanthochromis polyacanthus	80966	956788425	82	JAEMOU01	WGS	VRT	2022-01-11T00:00:00Z
Acanthocinus aedilis	1323394	13075336	13617	GINQ01	TSA	INV	2021-06-16T00:00:00Z
Acanthogammarus godlewskii	86500	34977907	57210	GEPE01	TSA	INV	2016-10-12T00:00:00Z
Acanthogobius hasta	267130	48964884	59937	GCNT01	TSA	VRT	2016-01-08T00:00:00Z
Acanthogorgia aspera	1157909	25971755	44354	GETB01	TSA	INV	2016-07-19T00:00:00Z
Acanthogorgia aspera	1157909	25971755	44354	GEXC01	TSA	INV	2016-09-14T00:00:00Z
Acantholyda hieroglyphica	1384720	28522168	31362	GBKM01	TSA	INV	2017-03-24T00:00:00Z
Acanthopagrus latus	8177	47986553	349	CAJHBV01	WGS	VRT	2020-10-10T00:00:00Z
Acanthopagrus latus	8177	4384362	41	CAJHBW01	WGS	VRT	2020-10-10T00:00:00Z
Acanthopagrus latus	8177	806072371	4265	JABAYC01	WGS	VRT	2020-07-23T00:00:00Z
Acanthopagrus latus	8177	733109041	288	JACEGW01	WGS	VRT	2021-09-24T00:00:00Z
Acanthophis wellsi	239747	12480	32	GAGZ01	TSA	VRT	2014-01-07T00:00:00Z
Acanthopleura granulata	61363	606536932	87	JABBOT01	WGS	INV	2020-12-21T00:00:00Z
Acanthopteroctetes unifascia	753143	52191271	163807	GENP01	TSA	INV	2016-11-28T00:00:00Z
Acanthopteroctetes unifascia	753143	32164585	102794	GENT01	TSA	INV	2016-11-28T00:00:00Z
Acanthopteroctetes unifascia	753143	14745985	44730	GENU01	TSA	INV	2016-11-28T00:00:00Z
Acanthoscelides obtectus	200917	2206664384	13298	CAKOFQ01	WGS	INV	2023-01-24T00:00:00Z
Acanthoscelides obtectus	200917	105241815	50399	GGYI01	TSA	INV	2019-10-15T00:00:00Z
Acanthoscurria geniculata	575412	5102162438	12478692	AZMS01	WGS	INV	2014-04-29T00:00:00Z
Acanthoscurria geniculata	575412	85064803	109122	GAZS01	TSA	INV	2014-03-26T00:00:00Z
Acanthoscurria juruenicola	2705224	123035609	152966	GIIZ01	TSA	INV	2022-08-30T00:00:00Z
Acanthoscurria rondoniae	1211104	110529175	150386	GIOJ01	TSA	INV	2021-06-11T00:00:00Z
Acanthosoma haemorrhoidale	483950	17637675	65	CAKNEZ01	WGS	INV	2022-02-13T00:00:00Z
Acanthosoma haemorrhoidale	483950	720352621	2405	CAKNFG01	WGS	INV	2022-02-13T00:00:00Z
Acanthosoma haemorrhoidale	483950	21765276	28218	GAUV02	TSA	INV	2018-11-30T00:00:00Z
Acanthurus coeruleus	157585	726740695	122891	JAPZDT01	WGS	VRT	2023-04-18T00:00:00Z
Acanthurus grammoptilus	2609487	583990304	166940	JAPZDU01	WGS	VRT	2023-04-18T00:00:00Z
Acanthurus leucopareius	1828454	642241911	17270	JAQMCX01	WGS	VRT	2023-04-18T00:00:00Z
Acanthurus leucosternon	459747	105794205	91412	GJGS01	TSA	VRT	2022-09-09T00:00:00Z
Acanthurus lineatus	483362	641975250	21098	JAPZDV01	WGS	VRT	2023-04-18T00:00:00Z
Acanthurus nigricauda	753644	730195458	134272	JAPZDW01	WGS	VRT	2023-04-18T00:00:00Z
Acanthurus reversus	1567455	1668418491	766596	JAPXVT01	WGS	VRT	2023-04-18T00:00:00Z
Acanthurus tennentii	586769	709716676	103499	JAPZDZ01	WGS	VRT	2023-04-17T00:00:00Z
Acanthurus tractus	1316013	712347717	125489	JAQNCA01	WGS	VRT	2023-04-17T00:00:00Z
Acartia clausii	136140	30768997	23313	GKAA01	TSA	INV	2023-01-09T00:00:00Z
Acartia tonsa	136180	986087961	383038	OETC01	WGS	INV	2017-12-20T00:00:00Z
Acartia tonsa	136180	74163142	60662	GFWY01	TSA	INV	2017-09-27T00:00:00Z
Acartia tonsa	136180	30851825	22784	GKAB01	TSA	INV	2023-01-09T00:00:00Z
Acartia tonsa	136180	118709440	119439	HAGX01	TSA	INV	2017-09-29T00:00:00Z
Acartophthalmus nigrinus	1262227	15061257	22242	GIGP01	TSA	INV	2021-01-13T00:00:00Z
Accipiter castanilius	993364	1191473876	42566	JANBPM01	WGS	VRT	2023-02-27T00:00:00Z
Accipiter cirrocephalus	518695	1204902086	98607	JANEXN01	WGS	VRT	2022-12-28T00:00:00Z
Accipiter cooperii	261198	1190545496	45722	JANBPI01	WGS	VRT	2023-02-27T00:00:00Z
Accipiter erythropus	387793	1211904210	111271	JANBPL01	WGS	VRT	2022-12-30T00:00:00Z
Accipiter fasciatus	387794	1269671760	287220	JANBPN01	WGS	VRT	2023-02-27T00:00:00Z
Accipiter gentilis	8957	1218930559	7086	JAOEIF01	WGS	VRT	2023-02-27T00:00:00Z
Accipiter gentilis	8957	1179252740	25797	BJER01	WGS	VRT	2020-04-03T00:00:00Z
Accipiter gentilis	8957	130343937	414	CAKNBG02	WGS	VRT	2022-10-12T00:00:00Z
Accipiter gentilis	8957	1112029929	4484	CAKNBJ01	WGS	VRT	2022-02-13T00:00:00Z
Accipiter gentilis	8957	52405606	46013	ICSY01	TSA	VRT	2022-11-17T00:00:00Z
Accipiter gentilis atricapillus	387753	1236783373	25603	JAESIU01	WGS	VRT	2021-03-09T00:00:00Z
Accipiter hiogaster	2868207	1223023164	105681	JANCIS01	WGS	VRT	2023-02-27T00:00:00Z
Accipiter melanochlamys	387799	1398011897	449	JANBZU01	WGS	VRT	2023-02-27T00:00:00Z
Accipiter melanoleucus	387800	1264461157	254994	JANEXH01	WGS	VRT	2023-02-27T00:00:00Z
Accipiter nisus	211598	1200068594	42993	JANBZV01	WGS	VRT	2023-02-27T00:00:00Z
Accipiter nisus	211598	1190649881	44975	BJBX01	WGS	VRT	2019-02-15T00:00:00Z
Accipiter novaehollandiae	387801	1234816084	210708	JANEXO01	WGS	VRT	2023-02-27T00:00:00Z
Accipiter rufitorques	2219150	1207981799	6447	JANHGY01	WGS	VRT	2023-02-27T00:00:00Z
Accipiter rufiventris	518696	1218545930	13562	JANUFW01	WGS	VRT	2023-02-27T00:00:00Z
Accipiter soloensis	387806	1202459754	8521	JAOEIG01	WGS	VRT	2023-02-27T00:00:00Z
Accipiter striatus	56330	1320931327	410584	JANCMG01	WGS	VRT	2022-12-30T00:00:00Z
Accipiter superciliosus	56255	1216271545	19262	JAOBUD01	WGS	VRT	2023-02-27T00:00:00Z
Accipiter virgatus	387810	1185843447	7814	JAOSZC01	WGS	VRT	2023-02-27T00:00:00Z
Acentria ephemerella	1666818	277661	4	CALPDK01	WGS	INV	2022-06-08T00:00:00Z
Acentria ephemerella	1666818	336121962	256	CALPDL01	WGS	INV	2022-06-08T00:00:00Z
Acer buergerianum	57649	77042349	51797	GJIN01	TSA	PLN	2021-11-19T00:00:00Z
Acer negundo	4023	442441229	108	JAJSOW01	WGS	PLN	2022-10-06T00:00:00Z
Acer negundo	4023	21831075	22047	GJQD01	TSA	PLN	2022-02-25T00:00:00Z
Acer pseudosieboldianum	47968	62331519	50474	GJBB01	TSA	PLN	2021-03-26T00:00:00Z
Acer yangbiense	1000413	665887899	280	VAHF01	WGS	PLN	2020-05-11T00:00:00Z
Acerentomon sp. AD-2013	1323558	35824511	44628	GAXE02	TSA	INV	2016-02-17T00:00:00Z
Acetes chinensis	439396	125283088	109531	GGVZ01	TSA	INV	2018-09-21T00:00:00Z
Achaea janata	378752	99369278	171969	GHGZ01	TSA	INV	2019-03-11T00:00:00Z
Achaea janata	378752	22854885	31463	GIIO01	TSA	INV	2020-02-20T00:00:00Z
Achaea janata	378752	58132022	53209	GIKP01	TSA	INV	2020-03-27T00:00:00Z
Achaea janata	378752	104291675	89119	GIKQ01	TSA	INV	2020-03-25T00:00:00Z
Achanius piceus	2991797	80208454	46952	GKEL01	TSA	INV	2023-02-03T00:00:00Z
Achatina immaculata	2605667	1653153977	563	WNKJ01	WGS	INV	2019-12-27T00:00:00Z
Acheta domesticus	6997	929173017	709385	JAAVVF01	WGS	INV	2020-10-07T00:00:00Z
Acheta domesticus	6997	67825656	46647	GHUU01	TSA	INV	2020-09-03T00:00:00Z
Acheta domesticus	6997	194600	182	GHVX01	TSA	INV	2020-04-02T00:00:00Z
Acheta domesticus	6997	41497113	50046	GDVN01	TSA	INV	2018-04-05T00:00:00Z
Achlya flavicornis	753485	379943634	548	CANQIZ01	WGS	INV	2022-12-19T00:00:00Z
Achlya flavicornis	753485	37679	2	CANQKR01	WGS	INV	2022-12-19T00:00:00Z
Achlyodes mithridates tamenund	2201486	360619446	244729	DWPP01	WGS	INV	2022-02-17T00:00:00Z
Achlyodes pallida	354750	260265516	543251	DWTL01	WGS	INV	2022-02-17T00:00:00Z
Acholoe squamosa	2922911	1468800005	3259	CASGGO01	WGS	INV	2023-02-24T00:00:00Z
Acholoe squamosa	2922911	2818617	48	CASGGQ01	WGS	INV	2023-02-27T00:00:00Z
Achondrostoma oligolepis	236538	720064293	907635	JAPMOI01	WGS	VRT	2023-04-26T00:00:00Z
Achondrostoma oligolepis	236538	948158850	1295108	JAPMOK01	WGS	VRT	2023-04-26T00:00:00Z
Achrioptera fallax	1603952	30405898	35132	GDVF01	TSA	INV	2019-09-03T00:00:00Z
Aciagrion migratum	546167	28682931	32992	GCCZ01	TSA	INV	2022-03-09T00:00:00Z
Acinonyx jubatus	32536	2372536860	14382	LLWD01	WGS	MAM	2015-12-16T00:00:00Z
Acinonyx jubatus	32536	2377450114	196	JANJSO01	WGS	MAM	2022-12-28T00:00:00Z
Acinonyx jubatus	32536	4769438765	6438	QURD01	WGS	MAM	2018-11-02T00:00:00Z
Acipenser baerii	27689	150788251	79197	GICB01	TSA	VRT	2020-06-18T00:00:00Z
Acipenser baerii	27689	136604581	91579	GICD01	TSA	VRT	2019-12-09T00:00:00Z
Acipenser baerii	27689	124473133	133996	GIPE01	TSA	VRT	2021-08-24T00:00:00Z
Acipenser gueldenstaedtii	7902	2389722506	3393603	JANDEF01	WGS	VRT	2022-08-29T00:00:00Z
Acipenser gueldenstaedtii	7902	208011161	369441	GGWK01	TSA	VRT	2018-10-02T00:00:00Z
Acipenser oxyrinchus	36177	34807151	53624	GGWJ01	TSA	VRT	2018-09-25T00:00:00Z
Acipenser oxyrinchus	36177	254007803	203131	GGZT01	TSA	VRT	2018-10-24T00:00:00Z
Acipenser oxyrinchus	36177	342285171	641485	GGZX01	TSA	VRT	2018-10-24T00:00:00Z
Acipenser oxyrinchus	36177	166715666	179564	GEUL01	TSA	VRT	2017-06-02T00:00:00Z
Acipenser oxyrinchus oxyrinchus	40147	991502287	1317395	JABEPO01	WGS	VRT	2020-05-28T00:00:00Z
Acipenser ruthenus	7906	1732545901	215913	SCEB01	WGS	VRT	2019-01-30T00:00:00Z
Acipenser ruthenus	7906	1830484458	3367	VTUV01	WGS	VRT	2023-03-27T00:00:00Z
Acipenser ruthenus	7906	70264153	1457	CACTIF02	WGS	VRT	2022-02-26T00:00:00Z
Acipenser ruthenus	7906	87961079	1670	CACTIG02	WGS	VRT	2022-01-29T00:00:00Z
Acipenser ruthenus	7906	755193853	936299	GKEF01	TSA	VRT	2023-04-13T00:00:00Z
Acipenser ruthenus	7906	30914796	8804	GKLU01	TSA	VRT	2023-04-13T00:00:00Z
Acipenser schrenckii	111304	25177633	12622	GJFP01	TSA	VRT	2021-06-07T00:00:00Z
Acipenser sinensis	61970	168641140	121398	GGYF01	TSA	VRT	2019-02-22T00:00:00Z
Acipenser sinensis	61970	58856177	91687	GETX01	TSA	VRT	2016-07-19T00:00:00Z
Acipenser stellatus	7903	16074405	8089	GJFQ01	TSA	VRT	2021-06-07T00:00:00Z
Acipenser sturio	61674	135647056	77634	GGQL01	TSA	VRT	2019-01-15T00:00:00Z
Acipenser transmontanus	7904	860366165	359947	JAIUCX01	WGS	VRT	2022-11-23T00:00:00Z
Aclerda sp. AD-2014	1585310	52568191	47693	GCWU01	TSA	INV	2018-11-30T00:00:00Z
Acleris cristana	758705	437273237	1052	CAOCGT01	WGS	INV	2023-01-17T00:00:00Z
Acleris cristana	758705	1546632	13	CAOCPX01	WGS	INV	2023-01-17T00:00:00Z
Acleris emargana	758706	77920	3	CAKMJL02	WGS	INV	2022-10-12T00:00:00Z
Acleris emargana	758706	669046345	1615	CAKMJO01	WGS	INV	2022-01-21T00:00:00Z
Acleris holmiana	572802	18645994	265	CASGFW01	WGS	INV	2023-02-24T00:00:00Z
Acleris holmiana	572802	531706245	7835	CASGGH01	WGS	INV	2023-02-24T00:00:00Z
Acleris literana	1100899	675217176	704	CAMPPK01	WGS	INV	2022-09-21T00:00:00Z
Acleris literana	1100899	540878	8	CAMPPL01	WGS	INV	2022-09-21T00:00:00Z
Acleris sparsana	758717	578581586	523	CAKLPS01	WGS	INV	2021-12-18T00:00:00Z
Acleris sparsana	758717	47187	3	CAKLPT01	WGS	INV	2021-12-18T00:00:00Z
Acomys cahirinus	10068	2270846306	34	JAJTCZ01	WGS	ROD	2023-05-01T00:00:00Z
Acomys cahirinus	10068	2306070819	371342	PVKX01	WGS	ROD	2019-01-16T00:00:00Z
Acomys dimidiatus	60744	151539250	18283	CAJQZA01	WGS	ROD	2021-07-03T00:00:00Z
Acomys percivali	83527	105493198	22423	CAJRSG01	WGS	ROD	2021-07-03T00:00:00Z
Acomys russatus	60746	36431753	590	CAJFAB01	WGS	ROD	2020-08-12T00:00:00Z
Acontista multicolor	1603010	37720717	38717	GCPQ01	TSA	INV	2019-01-15T00:00:00Z
Acopauropus ornatus	1820145	34039667	44050	GERO01	TSA	INV	2020-09-16T00:00:00Z
Acridotheres javanicus	451385	1051582182	4312	PEJO01	WGS	VRT	2018-05-03T00:00:00Z
Acridotheres tristis	279927	1193419045	455	JAPZMO01	WGS	VRT	2023-01-09T00:00:00Z
Acridotheres tristis	279927	969356965	2221	JAPZMP01	WGS	VRT	2023-01-03T00:00:00Z
Acroaspis sp. IDV 6688	2337723	76459826	47145	IANO01	TSA	INV	2022-11-17T00:00:00Z
Acrobasis suavella	1857951	514085146	1155	CALPDO01	WGS	INV	2022-06-08T00:00:00Z
Acrobasis suavella	1857951	14765	1	CALPDP01	WGS	INV	2022-06-08T00:00:00Z
Acrobates pygmaeus	190720	2500727	2071	CAJGQL01	WGS	MAM	2021-02-21T00:00:00Z
Acrobeloides nanus	290746	248054631	30759	OZJO01	WGS	INV	2018-06-08T00:00:00Z
Acrocephalus arundinaceus	39621	1200128141	3013	JAJEOU01	WGS	VRT	2022-01-20T00:00:00Z
Acrocephalus arundinaceus	39621	1184245996	29468	VZST01	WGS	VRT	2020-07-10T00:00:00Z
Acrocephalus familiaris kingi	481813	1079221614	13777	JAKKIJ01	WGS	VRT	2022-03-02T00:00:00Z
Acrocephalus scirpaceus scirpaceus	126889	29575273	169	CAJVGK01	WGS	VRT	2021-08-16T00:00:00Z
Acrocera orbiculus	210248	6129564	68	CANAHR01	WGS	INV	2022-11-17T00:00:00Z
Acrocera orbiculus	210248	209124642	522	CANAHU01	WGS	INV	2022-11-17T00:00:00Z
Acrocyrtus sp. NNG-2020	2768105	113235530	5875	JAHZND01	WGS	INV	2023-01-11T00:00:00Z
Acrolepiopsis sapporensis	1178048	21410976	19342	GJYK01	TSA	INV	2022-06-10T00:00:00Z
Acrolophitus hirtipes	1038058	52083143	90481	GIGA01	TSA	INV	2020-09-04T00:00:00Z
Acromyrmex charruanus	2715315	296539234	6883	JAANIC01	WGS	INV	2021-03-29T00:00:00Z
Acromyrmex echinatior	103372	313947481	433	JANHNX01	WGS	INV	2022-08-19T00:00:00Z
Acromyrmex echinatior	103372	288510352	16583	AEVX01	WGS	INV	2014-08-06T00:00:00Z
Acromyrmex heyeri	230685	295598610	11183	JAANIB01	WGS	INV	2021-03-29T00:00:00Z
Acromyrmex insinuator	230686	294656391	890	JAANHZ01	WGS	INV	2021-03-29T00:00:00Z
Acroneuria carolinensis	219317	64764894	75951	GHQC01	TSA	INV	2021-09-09T00:00:00Z
Acronicta aceris	987859	403587884	994	CAJUXQ02	WGS	INV	2022-01-24T00:00:00Z
Acronicta leporina	987862	73986	2	CAMYGR01	WGS	INV	2022-11-05T00:00:00Z
Acronicta leporina	987862	421000426	256	CAMYHH01	WGS	INV	2022-11-05T00:00:00Z
Acronicta psi	987865	402064912	146	CAMIUM01	WGS	INV	2022-09-02T00:00:00Z
Acronicta psi	987865	124983	1	CAMIUN01	WGS	INV	2022-09-02T00:00:00Z
Acropora acuminata	367763	394735330	3293	BLEZ01	WGS	INV	2020-09-04T00:00:00Z
Acropora awi	1929007	428844380	2821	BLFA01	WGS	INV	2020-09-04T00:00:00Z
Acropora cervicornis	6130	589780075	530533	GIYM01	TSA	INV	2021-06-07T00:00:00Z
Acropora cervicornis	6130	974315011	556132	GJIF01	TSA	INV	2022-03-31T00:00:00Z
Acropora cervicornis	6130	492201300	364417	GJIG01	TSA	INV	2022-08-30T00:00:00Z
Acropora cervicornis	6130	61198767	95389	GASU01	TSA	INV	2014-02-12T00:00:00Z
Acropora cytherea	46686	426326548	4046	BLFB01	WGS	INV	2020-09-04T00:00:00Z
Acropora digitifera	70779	415828151	955	BLFC01	WGS	INV	2020-09-04T00:00:00Z
Acropora digitifera	70779	379269570	54400	BACK02	WGS	INV	2016-01-09T00:00:00Z
Acropora digitifera	70779	20959179	24836	GIAQ01	TSA	INV	2020-10-20T00:00:00Z
Acropora digitifera	70779	207061949	276928	GIVI01	TSA	INV	2020-11-13T00:00:00Z
Acropora echinata	513064	401478809	2002	BLFD01	WGS	INV	2020-09-04T00:00:00Z
Acropora florida	70782	442824714	6979	BLFE01	WGS	INV	2020-09-04T00:00:00Z
Acropora gemmifera	70780	400993167	2274	BLFF01	WGS	INV	2020-09-04T00:00:00Z
Acropora gemmifera	70780	64697582	104488	GFQE01	TSA	INV	2017-10-03T00:00:00Z
Acropora hyacinthus	55974	447200179	2758	BLFG01	WGS	INV	2020-09-04T00:00:00Z
Acropora hyacinthus	55974	14970788	39984	GDIF01	TSA	INV	2015-07-29T00:00:00Z
Acropora hyacinthus	55974	446425040	907	JAIFHZ01	WGS	INV	2021-10-20T00:00:00Z
Acropora intermedia	114500	416875905	6224	BLFH01	WGS	INV	2020-09-04T00:00:00Z
Acropora microphthalma	156436	383861656	4878	BLFI01	WGS	INV	2020-09-04T00:00:00Z
Acropora millepora	45264	386599652	3869	QTZP01	WGS	INV	2019-02-06T00:00:00Z
Acropora millepora	45264	88396288	126539	GHGH01	TSA	INV	2019-04-02T00:00:00Z
Acropora millepora	45264	167335689	223565	GHGM01	TSA	INV	2019-04-02T00:00:00Z
Acropora millepora	45264	72998356	99478	GHGN01	TSA	INV	2019-03-08T00:00:00Z
Acropora millepora	45264	83485487	126999	GHGO01	TSA	INV	2019-03-08T00:00:00Z
Acropora millepora	45264	62340848	84501	GHGQ01	TSA	INV	2019-04-02T00:00:00Z
Acropora millepora	45264	129900142	189607	GHGS01	TSA	INV	2019-04-02T00:00:00Z
Acropora millepora	45264	63373375	105277	GHGT01	TSA	INV	2019-04-02T00:00:00Z
Acropora millepora	45264	196677144	284921	GHGU01	TSA	INV	2019-04-02T00:00:00Z
Acropora millepora	45264	475381253	854	JACAWQ01	WGS	INV	2020-07-29T00:00:00Z
Acropora muricata	159855	420731913	6861	BLFJ01	WGS	INV	2020-09-04T00:00:00Z
Acropora nasuta	70778	416422065	4717	BLFL01	WGS	INV	2020-09-04T00:00:00Z
Acropora palmata	6131	304252072	441	JAOVVL01	WGS	INV	2022-11-02T00:00:00Z
Acropora selago	165727	392938768	5816	BLFM01	WGS	INV	2020-09-04T00:00:00Z
Acropora solitaryensis	513077	35974776	40036	ICPH01	TSA	INV	2019-09-27T00:00:00Z
Acropora tenuis	70783	403138309	1538	BLAZ01	WGS	INV	2020-09-04T00:00:00Z
Acropora tenuis	70783	111847494	108246	IADL01	TSA	INV	2018-08-28T00:00:00Z
Acropora tenuis	70783	37400433	40776	ICLB01	TSA	INV	2019-02-02T00:00:00Z
Acropora yongei	117778	438047505	1010	BLFN01	WGS	INV	2020-09-04T00:00:00Z
Acrosomoides sp. IDV 7426	2511307	61232686	43278	ICOJ01	TSA	INV	2022-11-17T00:00:00Z
Acrossocheilus wenchowensis	1279364	971289456	546	JAJUBA01	WGS	VRT	2023-04-10T00:00:00Z
Acrosternum hilare	244443	40045896	50698	GCWR01	TSA	INV	2018-11-30T00:00:00Z
Acrostichum aureum	29594	34771154	47517	GEEI01	TSA	PLN	2016-12-13T00:00:00Z
Acrostichum speciosum	366450	36451860	36420	GEEJ01	TSA	PLN	2016-12-13T00:00:00Z
Acrotrichis sp. AD-2015	1661486	22086074	36729	GDPM01	TSA	INV	2019-12-17T00:00:00Z
Actenoides hombroni	1651254	1152258273	10367	WUAM01	WGS	VRT	2022-07-20T00:00:00Z
Actenoides lindsayi	342376	1173025913	174883	WTSP01	WGS	VRT	2022-09-20T00:00:00Z
Actias luna	63976	559129327	526146	WUCQ03	WGS	INV	2023-06-01T00:00:00Z
Actias selene	37776	31666082	46228	GBZL01	TSA	INV	2015-03-26T00:00:00Z
Actinemys marmorata	335395	2301118547	48	JAJLPC01	WGS	VRT	2022-02-09T00:00:00Z
Actinemys marmorata	335395	2209870670	2508	JAJLPD01	WGS	VRT	2022-02-08T00:00:00Z
Actinemys marmorata	335395	2279419356	140373	VOGN01	WGS	VRT	2019-11-01T00:00:00Z
Actinemys pallida	1485138	2326928347	53	JALMGD01	WGS	VRT	2022-06-01T00:00:00Z
Actinemys pallida	1485138	2348990949	260	JALMGE01	WGS	VRT	2022-06-01T00:00:00Z
Actinia equina	6106	409058306	1486	WHPX01	WGS	INV	2020-03-02T00:00:00Z
Actinia tenebrosa	6105	312758671	57	JALIZE01	WGS	INV	2023-05-04T00:00:00Z
Actinia tenebrosa	6105	238179736	4002	WAHB01	WGS	INV	2019-11-06T00:00:00Z
Actinia tenebrosa	6105	79258934	98780	GEVE01	TSA	INV	2016-07-21T00:00:00Z
Actinidia arguta var. hypoleuca	1837144	645140608	30	BRYE01	WGS	PLN	2023-03-15T00:00:00Z
Actinidia chinensis	3625	653861668	2366	VIGQ01	WGS	PLN	2019-11-14T00:00:00Z
Actinidia chinensis	3625	604217145	26721	AONS01	WGS	PLN	2014-08-11T00:00:00Z
Actinidia chinensis	3625	36968152	39594	GGMO01	TSA	PLN	2019-01-16T00:00:00Z
Actinidia chinensis	3625	14555796	10000	GALZ01	TSA	PLN	2016-02-09T00:00:00Z
Actinidia chinensis	3625	24728890	20000	GAMA01	TSA	PLN	2016-01-07T00:00:00Z
Actinidia chinensis	3625	18739216	26103	GAMB01	TSA	PLN	2016-01-07T00:00:00Z
Actinidia chinensis var. chinensis	1590841	553842477	1234	NKQK01	WGS	PLN	2018-03-30T00:00:00Z
Actinidia deliciosa	3627	621990945	41	JAMWYR01	WGS	PLN	2022-08-01T00:00:00Z
Actinidia deliciosa	3627	64924648	68460	GEYI01	TSA	PLN	2017-10-03T00:00:00Z
Actinidia eriantha	165200	690611029	1735	QOVS01	WGS	PLN	2019-02-08T00:00:00Z
Actinidia eriantha	165200	41223064	69396	GFOK01	TSA	PLN	2017-06-02T00:00:00Z
Actinidia eriantha	165200	657097116	87	JAHSQF01	WGS	PLN	2021-07-13T00:00:00Z
Actinidia polygama	64480	620382890	30	BRYF01	WGS	PLN	2023-03-15T00:00:00Z
Actinidia rufa	165716	647239177	501	BJWL01	WGS	PLN	2020-08-20T00:00:00Z
Actinidia rufa	165716	620324227	29	BRYG01	WGS	PLN	2023-03-15T00:00:00Z
Actinopyga echinites	571810	948570139	1021277	JAAAJZ02	WGS	INV	2023-01-03T00:00:00Z
Aculepeira matsudae	2337278	55985945	32480	IBMG01	TSA	INV	2022-11-17T00:00:00Z
Acusilas coccineus	1662254	56345048	38322	IASW01	TSA	INV	2022-11-17T00:00:00Z
Acusilas coccineus	1662254	50538200	38329	IBQF01	TSA	INV	2022-11-17T00:00:00Z
Acutaspis umbonifera	1585280	56800197	50765	GCXJ01	TSA	INV	2018-11-30T00:00:00Z
Acyrthosiphon pisum	7029	541120603	21227	SDIB01	WGS	INV	2022-05-11T00:00:00Z
Acyrthosiphon pisum	7029	512050927	67586	ABLF02	WGS	INV	2014-08-04T00:00:00Z
Adalia bipunctata	7084	357820147	1048	CAJUZC01	WGS	INV	2021-07-06T00:00:00Z
Adalia bipunctata	7084	25775280	107	CAJUZD01	WGS	INV	2021-07-06T00:00:00Z
Adalia decempunctata	115343	463831442	434	CATOPU01	WGS	INV	2023-05-27T00:00:00Z
Adalia decempunctata	115343	2998409	69	CATOPV01	WGS	INV	2023-05-27T00:00:00Z
Adamussium colbecki	95546	176062928	239776	GGIA01	TSA	INV	2018-08-21T00:00:00Z
Adansonia digitata	69109	686995032	232407	JAQSVH01	WGS	PLN	2023-03-28T00:00:00Z
Addax nasomaculatus	59515	2795170309	86923	JAIEZW01	WGS	MAM	2021-08-13T00:00:00Z
Adela reaumurella	233158	640260634	275016	WYDE02	WGS	INV	2023-01-03T00:00:00Z
Adelges cooleyi	133065	270197466	840	JALSES01	WGS	INV	2022-05-31T00:00:00Z
Adelges tsugae	357502	35793846	21848	GBJX01	TSA	INV	2015-02-24T00:00:00Z
Adelognathus sp. PSUC_FEM 10030001	2726093	267372574	202886	JABFVB01	WGS	INV	2021-06-09T00:00:00Z
Adelosebastes latens	1311530	832469038	70293	CAKAKR01	WGS	VRT	2021-10-07T00:00:00Z
Adelphocoris fasciaticollis	323752	79347388	58473	GGBO01	TSA	INV	2018-12-03T00:00:00Z
Adelphocoris lineolatus	236346	132280884	104131	GGBQ01	TSA	INV	2018-12-03T00:00:00Z
Adelphocoris suturalis	323751	120970259	133667	GGBU01	TSA	INV	2018-12-03T00:00:00Z
Adenodictyna kudoae	2337725	43964361	39466	IBQQ01	TSA	INV	2022-11-17T00:00:00Z
Adenophora triphylla var. japonica	265775	2477772497	8432	JAFEMH01	WGS	PLN	2022-03-07T00:00:00Z
Adiantum capillus-veneris	13818	4822565590	601	JABFUD02	WGS	PLN	2022-07-05T00:00:00Z
Adiantum nelumboides	2759587	6272107417	11766	JAKNSL02	WGS	PLN	2022-06-28T00:00:00Z
Adineta ricciae	249248	201276416	142228	OEOB01	WGS	INV	2018-02-08T00:00:00Z
Adineta ricciae	249248	174494180	4125	OEQJ01	WGS	INV	2018-02-08T00:00:00Z
Adineta ricciae	249248	135599987	4302	CAJNOJ01	WGS	INV	2021-03-05T00:00:00Z
Adineta ricciae	249248	172240959	22742	CAJNOR01	WGS	INV	2021-03-05T00:00:00Z
Adineta steineri	433720	160346746	7597	CAJNOE01	WGS	INV	2021-03-05T00:00:00Z
Adineta steineri	433720	160340742	9359	CAJNOG01	WGS	INV	2021-03-05T00:00:00Z
Adineta steineri	433720	171140834	8257	CAJNOI01	WGS	INV	2021-03-05T00:00:00Z
Adineta steineri	433720	231071434	8705	CAJNOM01	WGS	INV	2021-03-05T00:00:00Z
Adineta steineri	433720	156314491	9008	CAJNON01	WGS	INV	2021-03-05T00:00:00Z
Adineta steineri	433720	166602683	39093	CAJOAY01	WGS	INV	2021-03-11T00:00:00Z
Adineta steineri	433720	163706511	34092	CAJOAZ01	WGS	INV	2021-03-11T00:00:00Z
Adineta steineri	433720	163826361	32429	CAJOBB01	WGS	INV	2021-03-11T00:00:00Z
Adineta vaga	104782	109398351	12963	OENK01	WGS	INV	2018-02-08T00:00:00Z
Adineta vaga	104782	216204602	298880	OEOC01	WGS	INV	2018-02-08T00:00:00Z
Adineta vaga	104782	197096676	19202	WJQV01	WGS	INV	2020-12-19T00:00:00Z
Adineta vaga	104782	213704785	41657	CAWI02	WGS	INV	2015-01-30T00:00:00Z
Adineta vaga	104782	217117546	9856	JAGENE01	WGS	INV	2022-01-10T00:00:00Z
Adinopsis sp. GC000173	3032616	205153063	24720	JARJDW01	WGS	INV	2023-06-13T00:00:00Z
Adoretus sp. AD-2015	1661487	32878619	34742	GDNT01	TSA	INV	2019-12-17T00:00:00Z
Adoxophyes honmai	85585	469620330	72695	BHDV01	WGS	INV	2019-03-27T00:00:00Z
Adoxophyes honmai	85585	130442924	105001	IADH01	TSA	INV	2019-03-27T00:00:00Z
Adoxophyes orana	480707	40545352	44843	GGMW01	TSA	INV	2018-05-14T00:00:00Z
Adranes taylori	1535445	887794503	325912	WYDF02	WGS	INV	2023-01-03T00:00:00Z
Aechmea fasciata	326768	347866674	24	JAHZMM01	WGS	PLN	2022-09-15T00:00:00Z
Aedes aegypti	7159	1723878797	3752	JAJPPM01	WGS	INV	2022-01-27T00:00:00Z
Aedes aegypti	7159	744596036	223039	JXPU01	WGS	INV	2015-05-28T00:00:00Z
Aedes aegypti	7159	1870656574	6533	NIGP01	WGS	INV	2017-06-23T00:00:00Z
Aedes aegypti	7159	1310090344	36205	AAGE02	WGS	INV	2014-08-06T00:00:00Z
Aedes aegypti	7159	487313625	418060	GFNA01	TSA	INV	2017-05-08T00:00:00Z
Aedes aegypti	7159	2544753	1182	GDUN01	TSA	INV	2016-03-31T00:00:00Z
Aedes aegypti	7159	1269476883	1693247	JABWQA01	WGS	INV	2020-08-03T00:00:00Z
Aedes aegypti aegypti	1424507	1392416812	1101	JAKVPO01	WGS	INV	2022-09-27T00:00:00Z
Aedes albopictus	7160	1341044778	3342920	LMAV01	WGS	INV	2015-12-22T00:00:00Z
Aedes albopictus	7160	1776217663	355061	JXUM01	WGS	INV	2016-02-23T00:00:00Z
Aedes albopictus	7160	2247289552	2434	MNAF02	WGS	INV	2017-01-24T00:00:00Z
Aedes albopictus	7160	2538371206	2196	SWKY01	WGS	INV	2019-06-28T00:00:00Z
Aedes albopictus	7160	2636055571	20298	SWKZ01	WGS	INV	2019-06-28T00:00:00Z
Aedes albopictus	7160	1994738	1732	GEHC01	TSA	INV	2017-04-12T00:00:00Z
Aedes albopictus	7160	6600125	6881	GAPW01	TSA	INV	2016-03-08T00:00:00Z
Aedes albopictus	7160	16445006	8176	GCZT01	TSA	INV	2016-02-24T00:00:00Z
Aedes albopictus	7160	94410927	90722	GCLM01	TSA	INV	2015-09-23T00:00:00Z
Aedes albopictus	7160	1450641013	574	JAFDOQ01	WGS	INV	2021-04-20T00:00:00Z
Aedes koreicus	586676	879671010	65546	JAHHFK01	WGS	INV	2022-08-04T00:00:00Z
Aegiceras corniculatum	59970	30930804	49412	GELI01	TSA	PLN	2016-05-04T00:00:00Z
Aegilops bicornis	4483	5902718208	172	JAHIAL01	WGS	PLN	2022-01-26T00:00:00Z
Aegilops longissima	4486	770665321	127924	CAJFDG01	WGS	PLN	2022-02-17T00:00:00Z
Aegilops longissima	4486	5796085646	21779	JAHIAM01	WGS	PLN	2022-01-26T00:00:00Z
Aegilops searsii	4487	5336424591	24621	JAHHZK01	WGS	PLN	2022-01-26T00:00:00Z
Aegilops sharonensis	58530	410782611	93477	CAJFDF01	WGS	PLN	2022-02-17T00:00:00Z
Aegilops sharonensis	58530	5892836925	22657	JAHIAN01	WGS	PLN	2022-01-26T00:00:00Z
Aegilops speltoides	4573	4110187043	10827	JAHHZJ01	WGS	PLN	2022-01-12T00:00:00Z
Aegilops speltoides subsp. speltoides	58531	1095021341	182587	CALUEN01	WGS	PLN	2022-06-27T00:00:00Z
Aegilops tauschii	37682	246136581	10607	LYXL01	WGS	PLN	2017-04-24T00:00:00Z
Aegilops tauschii	37682	4310305719	112210	AOCO02	WGS	PLN	2017-10-25T00:00:00Z
Aegilops tauschii	37682	48044671	45723	IAAN01	TSA	PLN	2016-05-11T00:00:00Z
Aegilops tauschii	37682	57742202	55813	IAAO01	TSA	PLN	2016-05-11T00:00:00Z
Aegilops tauschii	37682	33747898	33680	IAAP01	TSA	PLN	2016-05-11T00:00:00Z
Aegilops tauschii	37682	64131189	65447	IAAQ01	TSA	PLN	2016-05-11T00:00:00Z
Aegilops tauschii	37682	58200560	60884	IAAR01	TSA	PLN	2016-05-11T00:00:00Z
Aegilops tauschii	37682	65665394	65827	IAAS01	TSA	PLN	2016-05-11T00:00:00Z
Aegilops tauschii	37682	54449535	53474	IAAT01	TSA	PLN	2016-05-11T00:00:00Z
Aegilops tauschii	37682	62012491	60479	IAAU01	TSA	PLN	2016-05-11T00:00:00Z
Aegilops tauschii	37682	62241597	60547	IAAV01	TSA	PLN	2016-05-11T00:00:00Z
Aegilops tauschii	37682	55870326	55848	IAAW01	TSA	PLN	2016-05-11T00:00:00Z
Aegilops tauschii subsp. strangulata	200361	4218064899	109196	NWVB02	WGS	PLN	2021-09-30T00:00:00Z
Aegilops tauschii subsp. tauschii	169297	4327207513	68537	MCGU01	WGS	PLN	2017-01-19T00:00:00Z
Aeginetia indica	290220	526468533	434209	IADU01	TSA	PLN	2018-12-01T00:00:00Z
Aegithalos caudatus	73327	1013845238	51963	WEIU01	WGS	VRT	2020-07-08T00:00:00Z
Aegosoma scabricorne	1554467	34451979	43115	GINR01	TSA	INV	2021-06-16T00:00:00Z
Aegotheles bennettii	48278	1089119258	25868	VZRW01	WGS	VRT	2020-07-10T00:00:00Z
Aegypius monachus	8959	1229976225	7718	JANUXQ01	WGS	VRT	2023-02-27T00:00:00Z
Aegypius monachus	8959	506528588	284369	GDQP01	TSA	VRT	2015-09-09T00:00:00Z
Aelia acuminata	1511221	948989416	2373	CAJVQN01	WGS	INV	2021-07-21T00:00:00Z
Aelia acuminata	1511221	25736419	70	CAJVQU02	WGS	INV	2022-02-09T00:00:00Z
Aenictocupidus jacobsonorum	1962788	176361189	200887	JAAAKC02	WGS	INV	2023-01-03T00:00:00Z
Aeoliscus strigatus	270546	381315519	8858	CAAKHB01	WGS	VRT	2020-08-05T00:00:00Z
Aeorestes cinereus	257879	2149060452	2536	JAAGEH01	WGS	MAM	2020-03-25T00:00:00Z
Aeorestes cinereus	257879	2118430019	2537	JAAGEI01	WGS	MAM	2020-03-25T00:00:00Z
Aepyceros melampus	9897	2631303056	24102	SJXQ01	WGS	MAM	2019-06-24T00:00:00Z
Aepyprymnus rufescens	38598	2295016	2046	CAJGQB01	WGS	MAM	2021-02-21T00:00:00Z
Aeromachus stigmata shanda	2201487	212577908	358973	DWJO01	WGS	INV	2022-02-17T00:00:00Z
Aeschnophlebia longistigma	1168614	21728060	27137	GCCD01	TSA	INV	2022-03-09T00:00:00Z
Aeschynomene evenia	561484	375939593	1451	RYYW01	WGS	PLN	2020-07-29T00:00:00Z
Aeschynomene evenia var. serrulata	1683806	38950224	46935	GFVI01	TSA	PLN	2017-08-28T00:00:00Z
Aeshna isoceles	638455	29776075	29303	GCBY01	TSA	INV	2022-03-09T00:00:00Z
Aeshna mixta	229377	25052876	29165	GCEJ01	TSA	INV	2022-03-09T00:00:00Z
Aeshna viridis	1566310	24565180	30043	GCED01	TSA	INV	2022-03-09T00:00:00Z
Aetalion reticulatum	269885	73113645	101467	GFDW01	TSA	INV	2020-01-15T00:00:00Z
Aethilla lavochrea	509293	284819469	553389	DWOU01	WGS	INV	2022-02-17T00:00:00Z
Aethina tumida	116153	259967705	8	JALKMD01	WGS	INV	2022-09-06T00:00:00Z
Aethina tumida	116153	207549811	3447	JALKME01	WGS	INV	2022-09-06T00:00:00Z
Aethina tumida	116153	234344249	3063	MRBJ01	WGS	INV	2020-05-28T00:00:00Z
Aethina tumida	116153	25138704	42761	GCKB01	TSA	INV	2015-03-18T00:00:00Z
Aethionema arabicum	228871	160164983	36176	ASZG01	WGS	PLN	2013-06-14T00:00:00Z
Aethionema arabicum	228871	747705	706	GDFY01	TSA	PLN	2015-07-09T00:00:00Z
Aethionema arabicum	228871	584527	686	GDGI01	TSA	PLN	2015-07-09T00:00:00Z
Aethionema carneum	586717	48087634	48442	GDQO01	TSA	PLN	2015-11-03T00:00:00Z
Aethionema grandiflorum	72657	14856006	18302	GDRI01	TSA	PLN	2015-10-07T00:00:00Z
Aethriamanta gracilis	1087058	25791624	33591	GCKH01	TSA	INV	2022-03-09T00:00:00Z
Agallia constricta	1585285	43799808	58380	GCWT01	TSA	INV	2018-11-30T00:00:00Z
Agamemnon cornutus	614091	31974511	57876	GDCE01	TSA	INV	2019-01-15T00:00:00Z
Agapanthia villosoviridescens	1553036	24700384	27071	GINS01	TSA	INV	2021-06-16T00:00:00Z
Agapanthus africanus	51501	20168172258	336	JASDDO01	WGS	PLN	2023-05-16T00:00:00Z
Agapanthus praecox subsp. orientalis	547170	53739700	71225	GALD01	TSA	PLN	2015-07-20T00:00:00Z
Agapetus fuscipes	1271715	5587192	118	CATOGX01	WGS	INV	2023-05-26T00:00:00Z
Agapetus fuscipes	1271715	616654305	4997	CATOHA01	WGS	INV	2023-05-26T00:00:00Z
Agapetus fuscipes	1271715	552637417	291536	JAGTXP01	WGS	INV	2022-03-17T00:00:00Z
Agapornis roseicollis	60468	1178186454	244961	JANEXD01	WGS	VRT	2023-01-30T00:00:00Z
Agapornis roseicollis	60468	1121789902	52900	NDXB01	WGS	VRT	2017-10-23T00:00:00Z
Agapostemon virescens	115084	469956152	52608	JAQQRL01	WGS	INV	2023-02-07T00:00:00Z
Agara belti belti	2585974	285635496	104996	DWEM01	WGS	INV	2022-02-17T00:00:00Z
Agara michaeli	2585977	284224238	80843	DWDX01	WGS	INV	2022-02-17T00:00:00Z
Agaricia lamarcki	262284	109795182	101322	GGLC03	TSA	INV	2018-08-28T00:00:00Z
Agasicles hygrophila	715812	25285390	25893	GHLR01	TSA	INV	2023-05-05T00:00:00Z
Agathemera crassa	58611	5857103	21800	GDYY01	TSA	INV	2019-09-03T00:00:00Z
Agathiphaga queenslandensis	41190	114018839	342970	GENX01	TSA	INV	2016-11-28T00:00:00Z
Agathiphaga queenslandensis	41190	57147508	184401	GENY01	TSA	INV	2016-11-28T00:00:00Z
Agathiphaga queenslandensis	41190	75074765	210844	GENZ01	TSA	INV	2016-11-28T00:00:00Z
Agathotanais misakiensis	2823062	66339810	37525	GJCP01	TSA	INV	2021-11-29T00:00:00Z
Agathymus mariae mariae	1945772	410467974	169692	DWPT01	WGS	INV	2022-02-17T00:00:00Z
Agave americana	39510	55699127	61548	GBHM01	TSA	PLN	2016-11-15T00:00:00Z
Agave amica	82206	99096533	96882	GGEA01	TSA	PLN	2018-01-03T00:00:00Z
Agave amica	82206	34584206	57052	GJVA01	TSA	PLN	2023-01-12T00:00:00Z
Agave amica	82206	6981736	16220	GJVB01	TSA	PLN	2023-01-12T00:00:00Z
Agave deserti	382119	123661629	120985	GAHT01	TSA	PLN	2013-08-26T00:00:00Z
Agave fourcroydes	1824557	20772060	23972	GJKH01	TSA	PLN	2022-10-31T00:00:00Z
Agave lechuguilla	39513	516366292	969872	GIUJ01	TSA	PLN	2021-02-23T00:00:00Z
Agave sisalana	442491	38903285	66954	GGRE01	TSA	PLN	2019-08-16T00:00:00Z
Agave sisalana	442491	23027522	26839	GJKI01	TSA	PLN	2022-10-31T00:00:00Z
Agave tequilana	386106	203355422	195967	GAHU01	TSA	PLN	2013-08-26T00:00:00Z
Agelaius phoeniceus	39638	1086309140	42265	VZSP01	WGS	VRT	2020-07-10T00:00:00Z
Agelaius phoeniceus	39638	1188478804	515	JAIWQD01	WGS	VRT	2022-12-05T00:00:00Z
Agelaius tricolor	9191	1157608456	214	JALJCS01	WGS	VRT	2022-04-19T00:00:00Z
Agelaius tricolor	9191	1142379013	450	JALJCT01	WGS	VRT	2022-04-19T00:00:00Z
Agelaius tricolor	9191	1075086955	70522	JADODQ01	WGS	VRT	2021-03-04T00:00:00Z
Agelas oroides	72715	256025995	450	CASBWI01	WGS	INV	2023-02-09T00:00:00Z
Agelas oroides	72715	4054962	169	CASBWJ01	WGS	INV	2023-02-09T00:00:00Z
Agelastica alni	131577	589987317	3471	CATNNC01	WGS	INV	2023-04-30T00:00:00Z
Agelastica alni	131577	8912027	121	CATNNH01	WGS	INV	2023-04-30T00:00:00Z
Agelena babai	2337279	52619770	38298	IATO01	TSA	INV	2022-11-17T00:00:00Z
Agelena labyrinthica	286032	50780753	40127	IBCI01	TSA	INV	2022-11-17T00:00:00Z
Agelena labyrinthica	286032	53575230	39137	IBVX01	TSA	INV	2022-11-17T00:00:00Z
Agelena labyrinthica	286032	64454943	43127	IBZQ01	TSA	INV	2022-11-17T00:00:00Z
Agelena silvatica	648239	50736337	40400	IAIS01	TSA	INV	2022-11-17T00:00:00Z
Agelena silvatica	648239	51172564	40239	IAOM01	TSA	INV	2022-11-17T00:00:00Z
Agelena silvatica	648239	40316841	37388	IAXX01	TSA	INV	2022-11-17T00:00:00Z
Agelena silvatica	648239	44700914	38439	IBEK01	TSA	INV	2022-11-17T00:00:00Z
Agelena silvatica	648239	65296490	47643	IBSG01	TSA	INV	2022-11-17T00:00:00Z
Agelena silvatica	648239	48674100	40062	ICKP01	TSA	INV	2022-11-17T00:00:00Z
Agelena sp. IDV 5527	2507250	57630342	42346	ICMD01	TSA	INV	2022-11-17T00:00:00Z
Agelenidae gen. sp. IDV 4709	2507274	56048582	42133	ICMB01	TSA	INV	2022-11-17T00:00:00Z
Agelenopsis naevia	313387	57116412	43293	IBOW01	TSA	INV	2022-11-17T00:00:00Z
Agelenopsis potteri	313392	48110894	40476	IBWF01	TSA	INV	2022-11-17T00:00:00Z
Ageneiosus marmoratus	2066578	1030000983	16063	QQRV01	WGS	VRT	2018-07-31T00:00:00Z
Ageratina adenophora	176616	298505651	330929	GJVI01	TSA	PLN	2023-05-05T00:00:00Z
Agkistrodon conanti	2782195	711021	743	GJUI01	TSA	VRT	2022-05-03T00:00:00Z
Agkistrodon conanti	2782195	231920	157	GDAZ01	TSA	VRT	2016-06-30T00:00:00Z
Agkistrodon contortrix	8720	864771	867	GJUG01	TSA	VRT	2022-05-03T00:00:00Z
Agkistrodon contortrix contortrix	8713	3726432	3357	GJSH01	TSA	VRT	2022-05-03T00:00:00Z
Agkistrodon contortrix contortrix	8713	6129050	3019	GDAY02	TSA	VRT	2017-04-17T00:00:00Z
Agkistrodon laticinctus	2782196	3168732	3131	GJUF01	TSA	VRT	2022-05-03T00:00:00Z
Agkistrodon laticinctus	2782196	1054491	949	GJUH01	TSA	VRT	2022-05-03T00:00:00Z
Agkistrodon piscivorus	8715	4251342	3907	GJUJ01	TSA	VRT	2022-05-03T00:00:00Z
Agkistrodon piscivorus	8715	1896813	1864	GJUK01	TSA	VRT	2022-05-03T00:00:00Z
Agkistrodon russeolus	109980	4393497	3661	GJSV01	TSA	VRT	2022-05-03T00:00:00Z
Agnathotermes crassinasus	1934436	130020443	182281	GHYW01	TSA	INV	2019-12-04T00:00:00Z
Agnesiotis pilosula	1661861	15165172	25448	GDOE01	TSA	INV	2019-12-17T00:00:00Z
Agnetina flavescens	1056665	43243783	50954	GHQK01	TSA	INV	2021-09-09T00:00:00Z
Agonopterix arenella	1594222	89720	2	CAKMJH01	WGS	INV	2022-11-16T00:00:00Z
Agonopterix arenella	1594222	539623764	529	CAKMJR01	WGS	INV	2022-09-29T00:00:00Z
Agonopterix subpropinquella	1857958	666958211	830	CAKLPN01	WGS	INV	2021-12-18T00:00:00Z
Agonopterix subpropinquella	1857958	83394	3	CAKLPO01	WGS	INV	2021-12-18T00:00:00Z
Agonum fuliginosum	1553040	20987324	74	CANNYK01	WGS	INV	2022-12-07T00:00:00Z
Agonum fuliginosum	1553040	626012494	2094	CANNYL01	WGS	INV	2022-12-07T00:00:00Z
Agraylea sexmaculata	1223681	196070961	7053	JAGTTH01	WGS	INV	2022-03-17T00:00:00Z
Agrilus cyanescens	1586972	260942280	1330	CANDXC01	WGS	INV	2022-11-25T00:00:00Z
Agrilus mali	1917227	291300295	611	JAQSLM01	WGS	INV	2023-03-28T00:00:00Z
Agrilus planipennis	224129	315599865	23185	JENH02	WGS	INV	2018-01-29T00:00:00Z
Agrilus planipennis	224129	6068419	11957	GAAB01	TSA	INV	2012-12-10T00:00:00Z
Agrilus planipennis	224129	17486769	20852	GDOC01	TSA	INV	2019-12-17T00:00:00Z
Agriocnemis femina oryzae	1566311	25038108	28425	GCKI01	TSA	INV	2022-03-09T00:00:00Z
Agrionoptera insignis	333427	29724341	33862	GCCO01	TSA	INV	2022-03-09T00:00:00Z
Agriopis aurantiaria	104476	482878758	550	CAJZBK01	WGS	INV	2021-09-11T00:00:00Z
Agriopis leucophaearia	934821	489922914	387	CASBLY01	WGS	INV	2023-02-03T00:00:00Z
Agriopis leucophaearia	934821	361228	7	CASBLZ01	WGS	INV	2023-02-03T00:00:00Z
Agriopis marginaria	190331	502488742	522	CAKOAR01	WGS	INV	2022-03-10T00:00:00Z
Agriopis marginaria	190331	27029	2	CAKOAS01	WGS	INV	2022-03-10T00:00:00Z
Agriotes lineatus	292458	1536774898	14144	CALNHX01	WGS	INV	2022-06-16T00:00:00Z
Agriphila geniculea	1660579	1061521	31	CALSUK01	WGS	INV	2022-06-13T00:00:00Z
Agriphila geniculea	1660579	723572193	1535	CALSUL01	WGS	INV	2022-06-13T00:00:00Z
Agriphila straminella	572809	2058548	24	CATNNE01	WGS	INV	2023-04-30T00:00:00Z
Agriphila straminella	572809	511839513	510	CATNNF01	WGS	INV	2023-04-30T00:00:00Z
Agriphila tristella	1594226	3207400	39	CAKMRQ01	WGS	INV	2022-01-28T00:00:00Z
Agriphila tristella	1594226	806420820	1190	CAKMRR01	WGS	INV	2022-01-28T00:00:00Z
Agrochola circellaris	987866	180955	4	CAJZBG01	WGS	INV	2021-09-11T00:00:00Z
Agrochola circellaris	987866	571928833	139	CAJZBI01	WGS	INV	2021-09-11T00:00:00Z
Agrochola litura	987869	1105314	26	CASCJX01	WGS	INV	2023-02-16T00:00:00Z
Agrochola litura	987869	700496505	2170	CASCKB01	WGS	INV	2023-02-16T00:00:00Z
Agrochola lota	987870	234149	5	CANAUK01	WGS	INV	2022-11-19T00:00:00Z
Agrochola lota	987870	623472971	651	CANAUL01	WGS	INV	2022-11-19T00:00:00Z
Agrochola macilenta	987872	113680	3	CAKAOO01	WGS	INV	2021-10-19T00:00:00Z
Agrochola macilenta	987872	644112804	1259	CAKAOP01	WGS	INV	2021-10-19T00:00:00Z
Agroeca coreana	2337280	65898941	44245	ICEP01	TSA	INV	2022-11-17T00:00:00Z
Agroeca kamurai	2337281	59831890	45005	IBGH01	TSA	INV	2022-11-17T00:00:00Z
Agroeca kamurai	2337281	69266460	45567	IBIB01	TSA	INV	2022-11-17T00:00:00Z
Agropyron cristatum	4593	32191448	73664	GBAU01	TSA	PLN	2015-09-30T00:00:00Z
Agrostis scabra	345920	176001429	302185	GFIW01	TSA	PLN	2017-07-17T00:00:00Z
Agrostis stolonifera	63632	79702223	80995	GEUC01	TSA	PLN	2016-11-03T00:00:00Z
Agrostis stolonifera	63632	169354343	275191	GFJH01	TSA	PLN	2017-03-21T00:00:00Z
Agrostis stolonifera	63632	191035722	333306	GFQK01	TSA	PLN	2017-07-10T00:00:00Z
Agrotis exclamationis	215162	663529244	597	CATLJN01	WGS	INV	2023-04-28T00:00:00Z
Agrotis exclamationis	215162	4116994	49	CATLKN01	WGS	INV	2023-04-28T00:00:00Z
Agrotis infusa	1555321	24600996	32632	GCUS01	TSA	INV	2019-11-05T00:00:00Z
Agrotis ipsilon	56364	515324295	104	JAPNUC01	WGS	INV	2023-02-09T00:00:00Z
Agrotis ipsilon	56364	486925161	7960	PNFC01	WGS	INV	2019-02-13T00:00:00Z
Agrotis ipsilon	56364	29706	21	GAAU01	TSA	INV	2012-10-31T00:00:00Z
Agrotis puta	1857961	71552	3	CALPBN02	WGS	INV	2022-09-21T00:00:00Z
Agrotis puta	1857961	517468476	1847	CALPBO02	WGS	INV	2022-09-21T00:00:00Z
Agrotis segetum	47767	45484873	62115	GBCW01	TSA	INV	2015-09-22T00:00:00Z
Agrypnia vestita	763278	1353059149	25153	JADDOH01	WGS	INV	2022-11-29T00:00:00Z
Agrypnus murinus	195168	6914721	152	CAKMYN01	WGS	INV	2022-02-09T00:00:00Z
Agrypnus murinus	195168	1216220439	5882	CAKMYP01	WGS	INV	2022-02-09T00:00:00Z
Agudus sp. AgspCi3	1924555	56475668	89602	GFDX01	TSA	INV	2020-01-15T00:00:00Z
Agulla sp. AD-2015	1593334	25837451	36521	GCRJ01	TSA	INV	2020-06-04T00:00:00Z
Aguna camagura	2201488	49510199	98878	DWJY01	WGS	INV	2022-02-17T00:00:00Z
Aguna claxon	1005070	220902713	595484	DWRG01	WGS	INV	2022-02-17T00:00:00Z
Aguna metophis	705134	305106165	480151	DWJX01	WGS	INV	2022-02-17T00:00:00Z
Agyllia agylla	2705550	129994796	342793	DWCJ01	WGS	INV	2022-02-17T00:00:00Z
Agyllia kituina	2705558	188600971	389381	DWCI01	WGS	INV	2022-02-17T00:00:00Z
Agyneta nigra	2337282	93272841	55874	IAJL01	TSA	INV	2022-11-17T00:00:00Z
Ahaetulla prasina	499056	1772420080	748	JAQQSC01	WGS	VRT	2023-02-22T00:00:00Z
Aidemona azteca	268514	85250201	138479	GIGD01	TSA	INV	2020-09-04T00:00:00Z
Ailanthus altissimus	2768810	937153372	584	CAMPEW01	WGS	PLN	2022-09-14T00:00:00Z
Ailanthus altissimus	2768810	20509517	4	CAMPEX01	WGS	PLN	2022-09-14T00:00:00Z
Ailuropoda melanoleuca	9646	2478972487	1335	JAJSAN01	WGS	MAM	2023-05-12T00:00:00Z
Ailuropoda melanoleuca	9646	2444060653	73513	LNAT02	WGS	MAM	2022-04-13T00:00:00Z
Ailuropoda melanoleuca	9646	2245296026	200592	ACTA01	WGS	MAM	2013-11-01T00:00:00Z
Ailurus fulgens styani	424585	2342939051	11589	LNAC01	WGS	MAM	2017-02-28T00:00:00Z
Ainerigone saitoi	2337727	94641029	51034	IBTE01	TSA	INV	2022-11-17T00:00:00Z
Aix galericulata	8832	1079840820	4010	JALLAJ01	WGS	VRT	2022-08-16T00:00:00Z
Akabosia matsudoensis	1588080	184623299	26975	VICI01	WGS	INV	2021-08-13T00:00:00Z
Akania bidwillii	19375	944729	740	GDGG01	TSA	PLN	2015-07-10T00:00:00Z
Akanthophoreus sp. R36	2823064	73290335	41146	GJCY01	TSA	INV	2021-11-29T00:00:00Z
Akarotaxis nudiceps	227741	844240027	83165	CALSCD01	WGS	VRT	2022-06-13T00:00:00Z
Akebia trifoliata	155132	652796637	913	JADQWC01	WGS	PLN	2021-04-16T00:00:00Z
Akis trilineata	1470650	75119961	53057	GKEQ01	TSA	INV	2023-02-03T00:00:00Z
Alastor atropos	1507333	24096583	34013	GBTG01	TSA	INV	2018-02-13T00:00:00Z
Alatina alata	1193083	1308494669	2005718	PUGI02	WGS	INV	2022-09-30T00:00:00Z
Alatina alata	1193083	48508802	31737	GEUJ01	TSA	INV	2016-07-05T00:00:00Z
Alatinidae sp. Z8VKAUB7J3	2292721	1323732878	721499	JAAAKM02	WGS	INV	2023-06-01T00:00:00Z
Alauda arvensis	88112	1028664229	5714	CADDXX01	WGS	VRT	2020-03-12T00:00:00Z
Alaudala cheleensis	670337	1069224903	65586	VWYE01	WGS	VRT	2020-07-10T00:00:00Z
Alaus oculatus	374458	7311681	8363	WUUV02	WGS	INV	2022-09-27T00:00:00Z
Albizia julibrissin	3813	209405462	153590	GHWM01	TSA	PLN	2019-10-09T00:00:00Z
Albula glossodonta	121402	1049070812	3445	JAFBMS01	WGS	VRT	2021-08-27T00:00:00Z
Albula goreensis	1534307	933663665	471	JAERUA01	WGS	VRT	2023-04-04T00:00:00Z
Alburnus alburnus	54556	1015840081	1487159	JAPMNU01	WGS	VRT	2023-04-26T00:00:00Z
Alca torda	28689	1162045472	39768	VZSD01	WGS	VRT	2020-07-10T00:00:00Z
Alca torda	28689	1220378950	3309	VMEC01	WGS	VRT	2019-10-10T00:00:00Z
Alca torda	28689	1178492568	95	VMED01	WGS	VRT	2019-10-10T00:00:00Z
Alcelaphus buselaphus	59517	3882338275	539659	SJXN01	WGS	MAM	2019-06-24T00:00:00Z
Alces alces	9852	2542089606	131786	SSNK01	WGS	MAM	2019-07-29T00:00:00Z
Alces alces	9852	2487828707	5939	JADEYB02	WGS	MAM	2023-05-22T00:00:00Z
Alcis repandata	174269	606527	10	CASBLX01	WGS	INV	2023-02-03T00:00:00Z
Alcis repandata	174269	371379186	716	CASBMA01	WGS	INV	2023-02-03T00:00:00Z
Alcyonidium flabelliforme	2663170	14514068	48775	JAOQFJ01	WGS	INV	2022-11-14T00:00:00Z
Aldabrachelys gigantea	167804	2373370604	720	JALNIE01	WGS	VRT	2022-11-15T00:00:00Z
Aldrovandia affinis	143900	27422913	27628	GFJD01	TSA	VRT	2018-05-15T00:00:00Z
Aldrovandia affinis	143900	1228814362	3414	JAINUG01	WGS	VRT	2023-04-12T00:00:00Z
Aleadryas rufinucha	461220	1050107613	33566	VZTH01	WGS	VRT	2020-07-10T00:00:00Z
Alectoris rufa	9079	1142509937	426	CAMZON01	WGS	VRT	2023-01-08T00:00:00Z
Alectoris rufa	9079	1027480606	10598	JADBKV01	WGS	VRT	2021-07-26T00:00:00Z
Alectura lathami	81907	1043215352	37168	VXAV01	WGS	VRT	2020-07-10T00:00:00Z
Aleiodes sp. PSUC_FEM 10030003	2726095	188372167	72818	JABSMS01	WGS	INV	2021-06-16T00:00:00Z
Aleiodes testaceus	422171	26533524	18563	GBUY01	TSA	INV	2017-03-24T00:00:00Z
Alenatea fuscocolorata	2337729	66394420	45092	IBZC01	TSA	INV	2022-11-17T00:00:00Z
Alentia gelatinosa	271774	1187348741	2998	CATLOO01	WGS	INV	2023-04-28T00:00:00Z
Alentia gelatinosa	271774	8209752	177	CATLOP01	WGS	INV	2023-04-28T00:00:00Z
Aleochara bilineata	135921	85899700	33003	NBZA01	WGS	INV	2018-04-17T00:00:00Z
Aleochara curtula	135881	26169214	21674	GATW02	TSA	INV	2020-01-06T00:00:00Z
Aleochara nigra	135888	107510753	12593	JARJDV01	WGS	INV	2023-06-13T00:00:00Z
Aleochara sp. GC000083	3032618	152715001	11085	JARJDZ01	WGS	INV	2023-06-13T00:00:00Z
Alera haworthiana	2201489	4147317	13232	DWKX01	WGS	INV	2022-02-17T00:00:00Z
Alethe castanea	228309	1103488593	193993	JANRGV01	WGS	VRT	2022-08-22T00:00:00Z
Alethe diademata	197521	1091984309	173286	JANRMJ01	WGS	VRT	2022-10-05T00:00:00Z
Alethe poliocephala	228308	1163580681	281486	JANZXQ01	WGS	VRT	2023-01-06T00:00:00Z
Aleurites moluccanus	123498	1973393398	3262382	CANXYC01	WGS	PLN	2023-04-03T00:00:00Z
Aleyrodes proletella	267832	194718456	139669	GJYF01	TSA	INV	2022-08-30T00:00:00Z
Alfaro cultratus	55102	639540724	32348	CAEFZX01	WGS	VRT	2021-09-18T00:00:00Z
Alitta virens	880429	521799974	3741	CAKOAC01	WGS	INV	2022-03-10T00:00:00Z
Alitta virens	880429	169933	10	CAKOAE01	WGS	INV	2022-03-10T00:00:00Z
Alitta virens	880429	193552380	233333	GINI01	TSA	INV	2020-05-06T00:00:00Z
Alkekengi officinarum var. franchetii	221454	65187731	75221	IABG01	TSA	PLN	2016-08-06T00:00:00Z
Allacma fusca	39272	425887823	571837	CAJVCH01	WGS	INV	2021-07-06T00:00:00Z
Allacma fusca	39272	240786774	3054	CAMXBX01	WGS	INV	2022-10-27T00:00:00Z
Allacma fusca	39272	6707529	89	CAMXBY01	WGS	INV	2022-10-27T00:00:00Z
Allagelena difficilis	198407	31352933	36428	IAQR01	TSA	INV	2022-11-17T00:00:00Z
Allagelena difficilis	198407	47794504	39653	IBYO01	TSA	INV	2022-11-17T00:00:00Z
Allagelena donggukensis	2337283	54450796	40002	IBLF01	TSA	INV	2022-11-17T00:00:00Z
Allagelena donggukensis	2337283	50331473	40735	IBUZ01	TSA	INV	2022-11-17T00:00:00Z
Allagelena donggukensis	2337283	46377439	40341	ICGL01	TSA	INV	2022-11-17T00:00:00Z
Allagelena opulenta	29934	51904513	32964	IBPE01	TSA	INV	2022-11-17T00:00:00Z
Allancastria cerisyi ferdinandi	371869	149926831	356280	DWHZ01	WGS	INV	2022-02-17T00:00:00Z
Allecula morio	1586984	70536879	52144	GKEV01	TSA	INV	2023-02-03T00:00:00Z
Alleculinae gen. n. sp.	2991821	48089007	41689	GKEP01	TSA	INV	2023-02-03T00:00:00Z
Alliaria petiolata	126270	1075010735	694	JAHZTW01	WGS	PLN	2021-10-05T00:00:00Z
Alligator mississippiensis	8496	2156978045	54713	LPUU01	WGS	VRT	2016-01-26T00:00:00Z
Alligator mississippiensis	8496	2161708281	7091	LPUV01	WGS	VRT	2016-01-26T00:00:00Z
Alligator mississippiensis	8496	2161713562	7093	AKHW03	WGS	VRT	2016-03-28T00:00:00Z
Alligator sinensis	38654	2198585703	177281	AVPB01	WGS	VRT	2014-08-11T00:00:00Z
Alligator sinensis	38654	445006203	107829	GIGK01	TSA	VRT	2020-01-28T00:00:00Z
Allium ampeloprasum	4681	109267703	189708	GFAR01	TSA	PLN	2016-12-21T00:00:00Z
Allium angulosum	105301	250580071	364529	GHMP01	TSA	PLN	2021-02-12T00:00:00Z
Allium ascalonicum	1476995	71611960	117636	GFAJ01	TSA	PLN	2016-12-21T00:00:00Z
Allium cepa	4679	12715631471	89846	CAJJJL01	WGS	PLN	2021-03-11T00:00:00Z
Allium cepa	4679	147838198	209845	GHMJ01	TSA	PLN	2021-02-12T00:00:00Z
Allium cepa	4679	73964807	116927	GEOY01	TSA	PLN	2016-12-21T00:00:00Z
Allium cepa	4679	33778981	39190	GETF01	TSA	PLN	2017-01-05T00:00:00Z
Allium cepa	4679	43088103	33161	GAAN01	TSA	PLN	2013-06-24T00:00:00Z
Allium cepa	4679	32047426	26994	GAAO01	TSA	PLN	2013-06-24T00:00:00Z
Allium cepa	4679	100274014	128597	GBGJ01	TSA	PLN	2014-06-16T00:00:00Z
Allium cepa	4679	273651260	249987	GBJZ01	TSA	PLN	2015-10-28T00:00:00Z
Allium cepa	4679	113967972	94051	GBRN01	TSA	PLN	2014-10-14T00:00:00Z
Allium cepa	4679	137859218	108450	GBRO01	TSA	PLN	2014-10-14T00:00:00Z
Allium cepa	4679	202991716	165179	GBRQ01	TSA	PLN	2014-11-03T00:00:00Z
Allium cepa var. aggregatum	28911	13577735759	2832894	BQKJ01	WGS	PLN	2022-06-15T00:00:00Z
Allium cepa var. aggregatum	28911	53344724	83177	GFAK01	TSA	PLN	2016-12-21T00:00:00Z
Allium chinense	130426	66791055	120869	GFAL01	TSA	PLN	2016-12-21T00:00:00Z
Allium ericetorum	166970	289508119	528016	GHMK01	TSA	PLN	2021-02-12T00:00:00Z
Allium fistulosum	35875	215568931	384169	GHMM01	TSA	PLN	2021-02-12T00:00:00Z
Allium fistulosum	35875	76537437	128312	GFAM01	TSA	PLN	2016-12-21T00:00:00Z
Allium macrostemon	91198	85473566	161670	GFAO01	TSA	PLN	2016-12-21T00:00:00Z
Allium nutans	138328	184061224	379692	GHML01	TSA	PLN	2021-02-12T00:00:00Z
Allium sativum	4682	54477874	36312	GFYZ01	TSA	PLN	2018-03-07T00:00:00Z
Allium sativum	4682	62015314	108027	GIYT01	TSA	PLN	2022-03-23T00:00:00Z
Allium sativum	4682	77945162	132218	GFAP01	TSA	PLN	2016-12-21T00:00:00Z
Allium sativum	4682	16243182905	33159	JABXWV02	WGS	PLN	2021-05-26T00:00:00Z
Allium tuberosum	4683	83770790	148686	GFAN01	TSA	PLN	2016-12-21T00:00:00Z
Allium ursinum	4684	373388393	440663	GHMQ01	TSA	PLN	2021-02-12T00:00:00Z
Allocapnia granulata	608854	88610166	70204	GIDW01	TSA	INV	2020-11-04T00:00:00Z
Allocnemis nigripes	1407257	18039426	21655	GCBU01	TSA	INV	2022-03-09T00:00:00Z
Allodiplogaster sp. RGD228	1615865	106096198	138028	HBYP01	TSA	INV	2023-01-25T00:00:00Z
Allodiplogaster sudhausi	2761625	352146914	396	CALZFC01	WGS	INV	2022-07-24T00:00:00Z
Allodiplogaster sudhausi	2761625	59008813	52998	GIUD01	TSA	INV	2020-10-08T00:00:00Z
Allodiplogaster sudhausi	2761625	85754085	89359	HBYD01	TSA	INV	2023-01-25T00:00:00Z
Allodiplogaster sudhausi	2761625	276121527	59299	JACMIH01	WGS	INV	2020-09-30T00:00:00Z
Allodynerus rossii	1585351	37781966	29785	GCVC01	TSA	INV	2018-02-12T00:00:00Z
Alloperla usa	2570568	64916030	78588	GHPQ01	TSA	INV	2021-09-09T00:00:00Z
Allophyes oxyacanthae	988056	453482524	541	CAKOAO01	WGS	INV	2022-03-10T00:00:00Z
Alloplasta piceator	2870495	8006766	365	CAMPGC01	WGS	INV	2022-09-14T00:00:00Z
Alloscopus bannaensis	2267856	112496283	4939	JAHZMW01	WGS	INV	2023-01-11T00:00:00Z
Alloteropsis angusta	486853	83838864	71815	GFYO01	TSA	PLN	2017-10-24T00:00:00Z
Alloteropsis cimicina	486854	46133798	51003	GFYN01	TSA	PLN	2017-10-19T00:00:00Z
Alloteropsis semialata	435756	747771851	688	QPGU01	WGS	PLN	2019-02-04T00:00:00Z
Alloteropsis semialata	435756	54177492	54184	GFYB01	TSA	PLN	2017-10-24T00:00:00Z
Alloteropsis semialata	435756	72115880	63267	GFYD01	TSA	PLN	2017-10-19T00:00:00Z
Alloteropsis semialata	435756	85422588	75435	GFYE01	TSA	PLN	2017-10-19T00:00:00Z
Alloteropsis semialata	435756	85030892	74625	GFYF01	TSA	PLN	2017-10-19T00:00:00Z
Alloteropsis semialata	435756	59532525	58112	GFYG01	TSA	PLN	2017-10-19T00:00:00Z
Alloteropsis semialata	435756	90646791	74384	GFYH01	TSA	PLN	2017-10-19T00:00:00Z
Alloteropsis semialata	435756	70320457	65321	GFYI01	TSA	PLN	2017-10-19T00:00:00Z
Alloteropsis semialata	435756	81636478	74016	GFYJ01	TSA	PLN	2017-10-19T00:00:00Z
Alloteropsis semialata	435756	94396929	87344	GFYK01	TSA	PLN	2017-10-19T00:00:00Z
Alloteropsis semialata	435756	61752141	57334	GFYL01	TSA	PLN	2017-10-19T00:00:00Z
Allothymoites kumadai	2337731	66615041	49557	ICHK01	TSA	INV	2022-11-17T00:00:00Z
Alnus glutinosa	3517	611874127	167345	QAOD01	WGS	PLN	2018-06-19T00:00:00Z
Alnus rubra	109069	550765978	2528	JAJPGS01	WGS	PLN	2023-02-23T00:00:00Z
Aloe vera	34199	83736760	111627	GFOB01	TSA	PLN	2018-07-20T00:00:00Z
Aloe vera	34199	90461909	141246	GFQR01	TSA	PLN	2018-07-09T00:00:00Z
Alopecoenas beccarii	262131	1115608669	72610	VWYH01	WGS	VRT	2020-07-10T00:00:00Z
Alopecosa moriutii	332767	42561559	39656	IBNM01	TSA	INV	2022-11-17T00:00:00Z
Alopecosa pulverulenta	75003	64967013	46002	ICJL01	TSA	INV	2022-11-17T00:00:00Z
Alopecosa virgata	1112378	51935324	31919	IAED01	TSA	INV	2022-11-17T00:00:00Z
Alopecurus myosuroides	81473	3571731728	4134	JAPCYS01	WGS	PLN	2023-02-22T00:00:00Z
Alopecurus myosuroides	81473	3547828963	199	CASDCE01	WGS	PLN	2023-02-19T00:00:00Z
Alosa alosa	278164	143193300	53340	GETY01	TSA	VRT	2016-07-19T00:00:00Z
Alosa alosa	278164	876687730	15886	JACFYM01	WGS	VRT	2022-06-13T00:00:00Z
Alosa alosa	278164	854597291	1094	JADWDJ01	WGS	VRT	2022-05-11T00:00:00Z
Alosa fallax	278165	755883915	813571	JAPMOH01	WGS	VRT	2023-04-26T00:00:00Z
Alosa pseudoharengus	34774	172008879	216529	GFCK01	TSA	VRT	2016-12-20T00:00:00Z
Alosa sapidissima	34773	903564947	73	JAHDTN01	WGS	VRT	2021-05-25T00:00:00Z
Alosa sapidissima	34773	852425339	5410	JAHDTO01	WGS	VRT	2021-05-24T00:00:00Z
Alosa sapidissima	34773	920207828	273	JAHTKL01	WGS	VRT	2021-07-13T00:00:00Z
Alouatta caraya	9502	87628431	80190	GGWL01	TSA	PRI	2022-09-19T00:00:00Z
Alouatta palliata	30589	3033617595	1136565	PVKV01	WGS	PRI	2019-01-16T00:00:00Z
Alphasida marseuli	2991740	82162335	79657	GKFO01	TSA	INV	2023-02-03T00:00:00Z
Alphitobius diaperinus	27448	75827132	73476	GKFB01	TSA	INV	2023-02-03T00:00:00Z
Alsophila aescularia	104486	591368	14	CAMIUD01	WGS	INV	2022-09-02T00:00:00Z
Alsophila aescularia	104486	897150441	2891	CAMIUG01	WGS	INV	2022-09-02T00:00:00Z
Alternanthera philoxeroides	381410	58425053	68034	GIRA01	TSA	PLN	2020-07-08T00:00:00Z
Alternanthera philoxeroides	381410	56260220	62223	GIRB01	TSA	PLN	2020-07-08T00:00:00Z
Alternanthera philoxeroides	381410	58934344	66146	GIRC01	TSA	PLN	2020-07-08T00:00:00Z
Alternanthera philoxeroides	381410	57944653	64709	GIRD01	TSA	PLN	2020-07-08T00:00:00Z
Alternanthera philoxeroides	381410	48225176	54246	GIRE01	TSA	PLN	2020-07-08T00:00:00Z
Alternanthera philoxeroides	381410	59289656	63564	GIRF01	TSA	PLN	2020-07-08T00:00:00Z
Alternanthera philoxeroides	381410	58846704	63269	GIRG01	TSA	PLN	2020-07-08T00:00:00Z
Alternanthera philoxeroides	381410	56751491	61412	GIRK01	TSA	PLN	2020-07-08T00:00:00Z
Alternanthera philoxeroides	381410	62973053	67217	GIRL01	TSA	PLN	2020-07-08T00:00:00Z
Alternanthera philoxeroides	381410	56575889	62486	GIRM01	TSA	PLN	2020-07-08T00:00:00Z
Alternanthera philoxeroides	381410	65205067	75635	GIRN01	TSA	PLN	2020-07-08T00:00:00Z
Alternanthera philoxeroides	381410	63879799	69344	GIRO01	TSA	PLN	2020-07-08T00:00:00Z
Alternanthera philoxeroides	381410	58999840	64306	GIRP01	TSA	PLN	2020-07-08T00:00:00Z
Alternanthera philoxeroides	381410	64344303	68293	GIRQ01	TSA	PLN	2020-07-08T00:00:00Z
Alternanthera philoxeroides	381410	50131703	57613	GIRR01	TSA	PLN	2020-07-08T00:00:00Z
Alternanthera philoxeroides	381410	68858406	78914	GIRS01	TSA	PLN	2020-07-08T00:00:00Z
Alternanthera philoxeroides	381410	64331078	72181	GIRT01	TSA	PLN	2020-07-08T00:00:00Z
Alternanthera philoxeroides	381410	58497004	65793	GIRU01	TSA	PLN	2020-07-08T00:00:00Z
Alternanthera philoxeroides	381410	256482875	195179	GISA01	TSA	PLN	2020-09-22T00:00:00Z
Altolamprologus calvus	34792	703299116	71712	VNKY01	WGS	VRT	2020-10-28T00:00:00Z
Altolamprologus calvus	34792	679688995	74994	VVCU01	WGS	VRT	2020-10-29T00:00:00Z
Altolamprologus compressiceps	34793	682927146	78633	VVEI01	WGS	VRT	2020-10-29T00:00:00Z
Altolamprologus compressiceps	34793	704179329	70922	VVEM01	WGS	VRT	2020-10-29T00:00:00Z
Altolamprologus sp. 'compressiceps shell' AB-2019	2591265	651032924	89027	VVEA01	WGS	VRT	2020-10-29T00:00:00Z
Altolamprologus sp. 'compressiceps shell' AB-2019	2591265	653157236	88918	VVEB01	WGS	VRT	2020-10-29T00:00:00Z
Alucita desmodactyla	1608660	31003476	29262	GCUR01	TSA	INV	2019-11-05T00:00:00Z
Alurnus ornatus	334019	18900651	36742	GDOF01	TSA	INV	2019-12-17T00:00:00Z
Alveopora japonica	979799	264745549	347470	GGJR01	TSA	INV	2018-03-19T00:00:00Z
Alviniconcha boucheti	1491183	31153322	23135	GJGJ01	TSA	INV	2022-01-04T00:00:00Z
Alviniconcha kojimai	1491185	45157281	31171	GJGH01	TSA	INV	2022-01-04T00:00:00Z
Alviniconcha marisindica	1491186	829610088	3926	JABMCL01	WGS	INV	2021-06-11T00:00:00Z
Alviniconcha strummeri	1472349	40808367	28848	GJGI01	TSA	INV	2022-01-04T00:00:00Z
Alychna victa	2839523	315406278	231428	DWNI01	WGS	INV	2022-02-17T00:00:00Z
Alydus pilosus	1585286	34803354	45835	GCVZ01	TSA	INV	2018-11-30T00:00:00Z
Alysson spinosus	1507100	47574924	40545	GBUA01	TSA	INV	2017-02-22T00:00:00Z
Amaranthus hybridus subsp. cruentus	117272	370913848	625	JAGPNP01	WGS	PLN	2021-07-30T00:00:00Z
Amaranthus hypochondriacus	28502	417460386	1567	JPXE02	WGS	PLN	2020-10-02T00:00:00Z
Amaranthus palmeri	107608	541080428	20269	NESY01	WGS	PLN	2022-10-20T00:00:00Z
Amaranthus palmeri	107608	402294022	1799	JAAKBG01	WGS	PLN	2021-08-26T00:00:00Z
Amaranthus palmeri	107608	388292728	1664	JAAKBH01	WGS	PLN	2021-08-26T00:00:00Z
Amaranthus palmeri	107608	49147628	72780	GFQG01	TSA	PLN	2018-05-01T00:00:00Z
Amaranthus tricolor	29722	520084113	48	JAOZEX01	WGS	PLN	2022-11-16T00:00:00Z
Amaranthus tricolor	29722	555413190	3339	JAOZEY01	WGS	PLN	2022-11-16T00:00:00Z
Amaranthus tricolor	29722	39518583	45529	GAPX01	TSA	PLN	2013-12-06T00:00:00Z
Amaranthus tricolor	29722	49377942	66172	GAPY01	TSA	PLN	2013-12-06T00:00:00Z
Amaranthus tricolor	29722	48980724	66486	GAPZ01	TSA	PLN	2013-12-06T00:00:00Z
Amaranthus tricolor	29722	29222106	59151	GAQA01	TSA	PLN	2013-12-06T00:00:00Z
Amaranthus tuberculatus	277990	4347977	15440	ACQK01	WGS	PLN	2013-11-01T00:00:00Z
Amaranthus tuberculatus	277990	149997699	113862	GGGT01	TSA	PLN	2018-02-21T00:00:00Z
Amastris sp. AmspME1B	1924573	47935366	60274	GFDY01	TSA	INV	2020-01-15T00:00:00Z
Amata phegea	938170	41695618	61547	GCNU01	TSA	INV	2019-11-05T00:00:00Z
Amaurobiidae gen. sp. IDV 5069	2337811	64089415	40889	IAKJ01	TSA	INV	2022-11-17T00:00:00Z
Amaurobius ferox	336583	37434219	265	CATNUR01	WGS	INV	2023-05-07T00:00:00Z
Amaurobius ferox	336583	2368227838	21294	CATNUU01	WGS	INV	2023-05-07T00:00:00Z
Amaurobius ferox	336583	50291367	37710	IAKN01	TSA	INV	2022-11-17T00:00:00Z
Amazona aestiva	12930	1129535839	3232	LMAW01	WGS	VRT	2018-11-21T00:00:00Z
Amazona aestiva	12930	1277482725	537407	JANEXC01	WGS	VRT	2022-11-22T00:00:00Z
Amazona aestiva	12930	1130393257	1498	JAESHV01	WGS	VRT	2021-03-30T00:00:00Z
Amazona autumnalis	151759	1299624158	699757	JANDJX01	WGS	VRT	2023-01-30T00:00:00Z
Amazona collaria	241587	1258720284	10638	RQIO01	WGS	VRT	2018-12-14T00:00:00Z
Amazona guildingii	175529	1133570109	29878	VXAR01	WGS	VRT	2020-07-10T00:00:00Z
Amazona leucocephala	241562	1181338393	310168	JANDEE01	WGS	VRT	2022-11-22T00:00:00Z
Amazona vinacea	244084	1101684052	75846	JANZMG01	WGS	VRT	2022-11-22T00:00:00Z
Amazona vittata	241585	1446649664	62712	AOCU02	WGS	VRT	2020-08-28T00:00:00Z
Ambicodamus sp. IDV 6680	2337284	72361594	39320	ICBW01	TSA	INV	2022-11-17T00:00:00Z
Amblema plicata	47525	190222260	264027	GGMV01	TSA	INV	2018-12-07T00:00:00Z
Amblema plicata	47525	211028469	312705	GITL01	TSA	INV	2021-06-11T00:00:00Z
Amblyopsis hoosieri	2849182	555301643	94387	JAODUE01	WGS	VRT	2023-01-03T00:00:00Z
Amblyopsis rosae	940464	551693502	97286	JAODTR01	WGS	VRT	2022-09-25T00:00:00Z
Amblyopsis spelaea	1195602	555081237	99205	JAODUF01	WGS	VRT	2023-01-03T00:00:00Z
Amblyornis subalaris	34926	1108380980	2426	JACAXG01	WGS	VRT	2021-06-14T00:00:00Z
Amblyraja radiata	386614	2558801738	958	JAAGWR01	WGS	VRT	2021-03-30T00:00:00Z
Amblyraja radiata	386614	1462441988	21992	JAAGWS01	WGS	VRT	2020-02-14T00:00:00Z
Amblyteles armatorius	231887	11300516	63	CAKOFR01	WGS	INV	2022-03-21T00:00:00Z
Amblyteles armatorius	231887	21240701	91	CAKOFT02	WGS	INV	2023-02-02T00:00:00Z
Amblytropidia mysteca	1034927	74309120	133474	GIGG01	TSA	INV	2020-09-04T00:00:00Z
Amborella trichopoda	13333	668218890	45301	AWHE01	WGS	PLN	2013-12-29T00:00:00Z
Ambrosia artemisiifolia	4212	1258364641	12228	JAMZMK01	WGS	PLN	2022-08-29T00:00:00Z
Ambrosia artemisiifolia	4212	89882431	109444	GFWB01	TSA	PLN	2017-09-11T00:00:00Z
Ambrosia artemisiifolia	4212	76261049	97227	GFWS01	TSA	PLN	2017-09-21T00:00:00Z
Ambrosia artemisiifolia	4212	1655580	2846	HAAJ01	TSA	PLN	2013-04-21T00:00:00Z
Ambrosia artemisiifolia	4212	132435591	218533	GEZL01	TSA	PLN	2016-11-02T00:00:00Z
Ambrosia trifida	4214	1657819354	14	JAPZBB01	WGS	PLN	2023-02-24T00:00:00Z
Ambrosia trifida	4214	60045975	65565	GIMT01	TSA	PLN	2020-05-22T00:00:00Z
Ambrosia trifida	4214	183354935	246544	GEOH01	TSA	PLN	2016-06-27T00:00:00Z
Ambystoma 'unisexual hybrid'	8307	12983046	17017	GFLD01	TSA	VRT	2017-04-12T00:00:00Z
Ambystoma laterale	8298	13334982	18016	GFLO01	TSA	VRT	2017-04-12T00:00:00Z
Ambystoma maculatum	43114	142613032	117912	GFMY01	TSA	VRT	2017-05-18T00:00:00Z
Ambystoma mexicanum	8296	353835245	611505	JXRH01	WGS	VRT	2015-11-25T00:00:00Z
Ambystoma mexicanum	8296	28206905576	27157	PGSH02	WGS	VRT	2021-04-01T00:00:00Z
Ambystoma mexicanum	8296	229488037	180605	GFZP01	TSA	VRT	2018-02-01T00:00:00Z
Ambystoma mexicanum	8296	793999180	1552382	GFBM01	TSA	VRT	2016-11-16T00:00:00Z
Ambystoma mexicanum	8296	3822269	5196	GEBK01	TSA	VRT	2016-03-01T00:00:00Z
Ambystoma texanum	8304	13291788	17355	GFLJ01	TSA	VRT	2017-04-12T00:00:00Z
Ambystoma tigrinum	8305	14501196	18549	GFLI01	TSA	VRT	2017-04-12T00:00:00Z
Ameiurus melas	219545	868496679	199	JAAGNN01	WGS	VRT	2020-04-16T00:00:00Z
Ameiurus nebulosus	27778	102223762	340942	GAGX01	TSA	VRT	2015-02-09T00:00:00Z
Amenia sp. RSM006	2086282	15279645	19303	GGGW01	TSA	INV	2018-09-04T00:00:00Z
Americobdella valdiviana	251237	93566267	73702	GIVY01	TSA	INV	2022-08-30T00:00:00Z
Amia calva	7924	831019635	1958	PESF01	WGS	VRT	2021-03-30T00:00:00Z
Amia calva	7924	897731172	12121	JAAWVP01	WGS	VRT	2021-02-26T00:00:00Z
Amia calva	7924	115948551	91498	GIOP01	TSA	VRT	2020-06-25T00:00:00Z
Amia calva	7924	97536690	35034	GEUG01	TSA	VRT	2016-07-21T00:00:00Z
Amissidens hainesi	591307	1687324528	154983	JANZXU01	WGS	VRT	2023-01-06T00:00:00Z
Amitermes sp. AB-2019	2660725	103702036	116163	GHXC01	TSA	INV	2019-10-24T00:00:00Z
Amitus sp. ZL-2020	2729014	160412742	137227	JABFOS01	WGS	INV	2022-04-05T00:00:00Z
Ammobates syriacus	600854	32110512	22137	GBMX01	TSA	INV	2017-03-24T00:00:00Z
Ammobius rufus	668932	68568767	66830	GKEO01	TSA	INV	2023-02-03T00:00:00Z
Ammodramus savannarum pratensis	2860302	906668489	12343	JAHXMQ01	WGS	VRT	2021-10-13T00:00:00Z
Ammodytes dubius	1266862	748563532	835	JAOPFK01	WGS	VRT	2022-11-15T00:00:00Z
Ammodytes marinus	146480	34878406	591	CATLJP01	WGS	VRT	2023-04-28T00:00:00Z
Ammodytes marinus	146480	756335084	3619	CATLKI01	WGS	VRT	2023-04-28T00:00:00Z
Ammoglanis amapaensis	2809288	783245381	457740	JAOUQU01	WGS	VRT	2023-02-09T00:00:00Z
Ammophila sabulosa	1088610	27191551	21852	GBMT01	TSA	INV	2017-03-24T00:00:00Z
Ammophorus cf. peruvianus	2991742	73677357	66159	GKEM01	TSA	INV	2023-02-03T00:00:00Z
Ammopiptanthus mongolicus	126911	54484692	81930	GAZZ01	TSA	PLN	2016-03-03T00:00:00Z
Ammopiptanthus mongolicus	126911	6901320	10281	GDAH01	TSA	PLN	2016-08-02T00:00:00Z
Ammospiza caudacuta	2857398	1241209685	282	JAQIHB01	WGS	VRT	2023-06-23T00:00:00Z
Ammospiza caudacuta	2857398	1166743317	3054	JAQIHC01	WGS	VRT	2023-06-23T00:00:00Z
Ammospiza nelsoni	2857394	1185463352	77	JAQCNT01	WGS	VRT	2023-06-23T00:00:00Z
Ammospiza nelsoni	2857394	1033298713	2834	JAQCNU01	WGS	VRT	2023-06-23T00:00:00Z
Ammotragus lervia	9899	2650836958	77320	NIVO01	WGS	MAM	2021-12-06T00:00:00Z
Amolops wuyiensis	120494	74874091	103129	GJEE01	TSA	VRT	2021-05-26T00:00:00Z
Amomum subulatum	1008370	172328012	156822	GIAV01	TSA	PLN	2019-11-19T00:00:00Z
Amomum subulatum	1008370	167556334	148953	GIAW01	TSA	PLN	2019-11-19T00:00:00Z
Amorpha juglandis	522887	462288996	434	CASBPH01	WGS	INV	2023-02-04T00:00:00Z
Amorpha juglandis	522887	200151	5	CASBPJ01	WGS	INV	2023-02-04T00:00:00Z
Amorphophallus konjac	78372	5598555559	3678	JAHNEJ01	WGS	PLN	2022-03-14T00:00:00Z
Amorphophallus titanum	175755	942822506	9603	JANBPO01	WGS	PLN	2022-11-25T00:00:00Z
Amphibalanus amphitrite	1232801	613414131	2240	VIIS01	WGS	INV	2019-12-27T00:00:00Z
Amphibalanus amphitrite	1232801	807604242	2643	JAHNUP01	WGS	INV	2021-06-29T00:00:00Z
Amphibalanus improvisus	1220549	88578605	212186	GHIG01	TSA	INV	2020-04-16T00:00:00Z
Amphibalanus improvisus	1220549	56098822	72181	GHIM01	TSA	INV	2020-05-22T00:00:00Z
Amphibolis antarctica	55438	244675974	16915	JAMKPZ01	WGS	PLN	2022-08-15T00:00:00Z
Amphicarpaea edgeworthii	132429	299059313	24	JACEGY01	WGS	PLN	2020-10-07T00:00:00Z
Amphicnemis gracilis	1566312	26104532	23124	GCCR01	TSA	INV	2022-03-09T00:00:00Z
Amphiduros pacificus	1209993	698966316	1312	CASGGJ01	WGS	INV	2023-02-24T00:00:00Z
Amphiduros pacificus	1209993	577319	19	CASGGN01	WGS	INV	2023-02-24T00:00:00Z
Amphilophus citrinellus	61819	844902565	6637	CCOE01	WGS	VRT	2014-09-06T00:00:00Z
Amphilophus citrinellus	61819	961230971	1392	JACBYM01	WGS	VRT	2020-07-23T00:00:00Z
Amphilophus zaliosus	281253	691926659	103854	VUQL01	WGS	VRT	2020-10-29T00:00:00Z
Amphimedon queenslandica	400682	144846769	27855	ACUQ01	WGS	INV	2014-05-05T00:00:00Z
Amphimedon queenslandica	400682	1220543	2733	GBXN01	TSA	INV	2015-09-02T00:00:00Z
Amphimedon queenslandica	400682	167703827	3871	JADHEG01	WGS	INV	2020-12-22T00:00:00Z
Amphinemura delosa	910623	81434322	68514	GIEE01	TSA	INV	2020-11-04T00:00:00Z
Amphinemura sulcicollis	143724	271924966	432491	LVVV01	WGS	INV	2016-06-24T00:00:00Z
Amphioctopus burryi	2447850	1031232840	605084	JAOSYW01	WGS	INV	2022-12-13T00:00:00Z
Amphipoea lucens	987875	641437241	723	CANNRS01	WGS	INV	2022-12-05T00:00:00Z
Amphipoea lucens	987875	687696	11	CANNSA01	WGS	INV	2022-12-05T00:00:00Z
Amphipoea oculea	987876	530568238	453	CAMAOF01	WGS	INV	2022-09-02T00:00:00Z
Amphipoea oculea	987876	419716	8	CAMAOK01	WGS	INV	2022-09-02T00:00:00Z
Amphiprion bicinctus	367269	406805749	516538	GDCV01	TSA	VRT	2016-06-07T00:00:00Z
Amphiprion clarkii	80970	846392538	190	JALBFV01	WGS	VRT	2022-12-21T00:00:00Z
Amphiprion ocellaris	80972	863468154	353	JAJUWX01	WGS	VRT	2022-04-11T00:00:00Z
Amphiprion ocellaris	80972	880704246	6404	NXFZ01	WGS	VRT	2017-11-16T00:00:00Z
Amphiprion percula	161767	908955932	366	PYAM01	WGS	VRT	2018-11-28T00:00:00Z
Amphiprion percula	161767	880720895	6405	GJAS01	TSA	VRT	2021-03-16T00:00:00Z
Amphipsocus japonicus	297952	29486912	29202	GDDX01	TSA	INV	2018-11-30T00:00:00Z
Amphipyra berbera	987877	579408172	221	CAJVCF01	WGS	INV	2021-07-06T00:00:00Z
Amphipyra berbera	987877	99973	1	CAJVCG02	WGS	INV	2022-02-09T00:00:00Z
Amphipyra pyramidea	987878	26547962	32040	GCDG01	TSA	INV	2019-11-05T00:00:00Z
Amphipyra tragopoginis	689058	18649	1	CAJMZU01	WGS	INV	2021-02-13T00:00:00Z
Amphipyra tragopoginis	689058	806994927	238	CAJMZV01	WGS	INV	2021-02-13T00:00:00Z
Amphithera heteroleuca	753260	12059271	25846	GCNV01	TSA	INV	2019-11-05T00:00:00Z
Amphiura filiformis	82378	62639456	136384	GGVU01	TSA	INV	2018-09-07T00:00:00Z
Amphizoa insolens	107775	29603314	23404	GFUZ01	TSA	INV	2017-08-24T00:00:00Z
Amphizoa lecontei	159779	46313030	53272	GFUH01	TSA	INV	2019-02-27T00:00:00Z
Ampittia dioscorides camertes	2201490	247860835	557635	DWOW01	WGS	INV	2022-02-17T00:00:00Z
Ampulex compressa	860918	87334575	62781	GFCP01	TSA	INV	2017-04-03T00:00:00Z
Ampulex compressa	860918	21293266	24364	GBNT01	TSA	INV	2017-03-24T00:00:00Z
Ampulex compressa	860918	277735878	7342	JAHFVI01	WGS	INV	2021-06-28T00:00:00Z
Ampulex fasciata	1507101	21476963	24883	GBVO01	TSA	INV	2017-03-24T00:00:00Z
Ampullaceana balthica	582868	1105887359	4540	CALYLW01	WGS	INV	2022-07-09T00:00:00Z
Amrasca biguttula biguttula	1836603	124738806	75273	GGAG01	TSA	INV	2019-06-20T00:00:00Z
Amyciaea forticeps	486298	70860227	44739	IAUW01	TSA	INV	2022-11-17T00:00:00Z
Amyelois transitella	680683	347392964	47095	LACK01	WGS	INV	2015-07-22T00:00:00Z
Amyelois transitella	680683	116381533	93073	GDGN01	TSA	INV	2015-06-26T00:00:00Z
Amynthas corticis	351238	459466737	1972796	FXXG01	WGS	INV	2017-07-14T00:00:00Z
Amynthas corticis	351238	1017224661	3169720	FXXH01	WGS	INV	2017-07-14T00:00:00Z
Amynthas gracilis	301145	118398072	140556	GIKF01	TSA	INV	2020-05-22T00:00:00Z
Anabarilius grahami	495550	991887266	80398	RJVU01	WGS	VRT	2018-11-15T00:00:00Z
Anabas testudineus	64144	524844595	23072	OMLL01	WGS	VRT	2018-03-09T00:00:00Z
Anabas testudineus	64144	1409930	27	OOHO03	WGS	VRT	2021-04-23T00:00:00Z
Anabas testudineus	64144	539091056	2641	CAABOV01	WGS	VRT	2019-01-10T00:00:00Z
Anableps anableps	195821	867632993	33	JABWDS01	WGS	VRT	2020-10-02T00:00:00Z
Anableps anableps	195821	445542990	5088	JABWDT01	WGS	VRT	2020-09-30T00:00:00Z
Anabrus simplex	316456	271041613	310367	GJIY01	TSA	INV	2021-09-17T00:00:00Z
Anacardium occidentale	171929	356592713	3268	JAJEJH01	WGS	PLN	2022-11-10T00:00:00Z
Anacroneuria wipukupa	2570569	59993566	61178	GHPL01	TSA	INV	2021-09-09T00:00:00Z
Anadara broughtonii	148819	86839770	116264	GEXI01	TSA	INV	2016-08-25T00:00:00Z
Anadara kagoshimensis	1390362	1115236308	36	JACFYK01	WGS	INV	2021-12-28T00:00:00Z
Anagrus nilaparvatae	2479706	488841863	394	JAKSXM01	WGS	INV	2022-03-15T00:00:00Z
Anahita fauna	795148	66068936	42963	IANH01	TSA	INV	2022-11-17T00:00:00Z
Anahita fauna	795148	59428211	41843	IBVK01	TSA	INV	2022-11-17T00:00:00Z
Anahita fauna	795148	51332517	40108	ICER01	TSA	INV	2022-11-17T00:00:00Z
Anallacta methanoides	1661865	20956541	53367	GEAA01	TSA	INV	2019-01-25T00:00:00Z
Ananas comosus	4615	524069662	8448	LSRQ01	WGS	PLN	2016-06-10T00:00:00Z
Ananas comosus	4615	381896302	3128	LODP01	WGS	PLN	2016-03-14T00:00:00Z
Ananas comosus	4615	459433240	1909	BPUV01	WGS	PLN	2022-02-08T00:00:00Z
Ananas comosus	4615	440841722	2059	BPUW01	WGS	PLN	2022-02-08T00:00:00Z
Ananas comosus	4615	66061433	3108	CABGUK02	WGS	PLN	2020-07-15T00:00:00Z
Ananas comosus	4615	41323148	60988	GFDK01	TSA	PLN	2017-01-27T00:00:00Z
Ananas comosus var. bracteatus	296719	57302746	23483	GHJB01	TSA	PLN	2019-04-18T00:00:00Z
Ananas comosus var. bracteatus	296719	483204069	37	JAHXRU01	WGS	PLN	2023-03-22T00:00:00Z
Anania crocealis	1100908	487044438	565	CASGFY01	WGS	INV	2023-02-24T00:00:00Z
Anania crocealis	1100908	330378	6	CASGGE01	WGS	INV	2023-02-24T00:00:00Z
Anania fuscalis	1100909	492474218	449	CATNUD01	WGS	INV	2023-05-02T00:00:00Z
Anania fuscalis	1100909	576005	13	CATNUF01	WGS	INV	2023-05-02T00:00:00Z
Anarrhichthys ocellatus	433405	568987294	33924	SAUM01	WGS	VRT	2019-03-22T00:00:00Z
Anarsia innoxiella	2566270	260764126	439	CANOAY01	WGS	INV	2022-12-13T00:00:00Z
Anas platyrhynchos	8839	1265073014	18550	NOIJ01	WGS	VRT	2017-07-25T00:00:00Z
Anas platyrhynchos	8839	1126159488	2149	RHJV01	WGS	VRT	2018-11-29T00:00:00Z
Anas platyrhynchos	8839	1211992756	1665	VSDN01	WGS	VRT	2022-01-05T00:00:00Z
Anas platyrhynchos	8839	1069956150	227448	ADON01	WGS	VRT	2013-06-17T00:00:00Z
Anas platyrhynchos	8839	803080920	199993	GHJL01	TSA	VRT	2019-06-04T00:00:00Z
Anas platyrhynchos	8839	356257931	89289	GJHB01	TSA	VRT	2022-07-05T00:00:00Z
Anas platyrhynchos	8839	1217695176	294	JACEUL01	WGS	VRT	2022-01-05T00:00:00Z
Anas platyrhynchos	8839	1186367508	421	JACEUM01	WGS	VRT	2022-01-05T00:00:00Z
Anas platyrhynchos	8839	1188516685	755	JACGAL01	WGS	VRT	2020-11-23T00:00:00Z
Anas platyrhynchos platyrhynchos	8840	1136395414	21442	PEDO01	WGS	VRT	2017-11-03T00:00:00Z
Anas zonorhyncha	75864	1310797575	20089	NOIK01	WGS	VRT	2017-07-25T00:00:00Z
Anasa tristis	236421	41628177	55033	GEIH01	TSA	INV	2020-01-09T00:00:00Z
Anasa tristis	236421	32728519	46031	GEII01	TSA	INV	2020-01-09T00:00:00Z
Anasa tristis	236421	41737148	58227	GCWG01	TSA	INV	2018-11-30T00:00:00Z
Anaspides tasmaniae	77687	16302568	27527	GCBI01	TSA	INV	2020-09-16T00:00:00Z
Anaspis maculata	295995	5130822	41	CASBRS01	WGS	INV	2023-02-07T00:00:00Z
Anaspis maculata	295995	722940767	5409	CASBRT01	WGS	INV	2023-02-07T00:00:00Z
Anastatica hierochuntica	663965	542343195	72649	OVAN01	WGS	PLN	2019-06-13T00:00:00Z
Anastatus disparis	2740161	939582303	410	JAFFSR01	WGS	INV	2021-03-04T00:00:00Z
Anastrepha distincta	95501	55911874	58863	GIZY01	TSA	INV	2022-02-07T00:00:00Z
Anastrepha fraterculus	95504	56443240	57685	GIYY01	TSA	INV	2022-02-07T00:00:00Z
Anastrepha fraterculus	95504	63974341	67280	GIYZ01	TSA	INV	2022-02-07T00:00:00Z
Anastrepha fraterculus	95504	54336195	60685	GIZA01	TSA	INV	2022-02-07T00:00:00Z
Anastrepha fraterculus	95504	64592930	68066	GIZB01	TSA	INV	2022-02-07T00:00:00Z
Anastrepha fraterculus	95504	63200964	70094	GIZC01	TSA	INV	2022-02-07T00:00:00Z
Anastrepha fraterculus	95504	57801141	64040	GIZJ01	TSA	INV	2022-02-25T00:00:00Z
Anastrepha fraterculus	95504	68748534	74477	GJDW01	TSA	INV	2022-05-09T00:00:00Z
Anastrepha grandis	87114	67878135	62094	GIZD01	TSA	INV	2022-02-07T00:00:00Z
Anastrepha ludens	28586	820783141	141	JAKYJY01	WGS	INV	2023-02-06T00:00:00Z
Anastrepha ludens	28586	786673534	15663	JAKYJZ01	WGS	INV	2023-02-02T00:00:00Z
Anastrepha ludens	28586	988757411	155865	JAPVRI01	WGS	INV	2023-04-17T00:00:00Z
Anastrepha ludens	28586	74463289	91707	GIAX02	TSA	INV	2022-04-07T00:00:00Z
Anastrepha obliqua	95512	836759028	206	JAPTHP01	WGS	INV	2023-01-24T00:00:00Z
Anastrepha obliqua	95512	843352941	3843	JAPTHQ01	WGS	INV	2023-01-23T00:00:00Z
Anastrepha obliqua	95512	61654936	55754	GIZE01	TSA	INV	2022-02-07T00:00:00Z
Anastrepha obliqua	95512	73210739	79325	GIZF01	TSA	INV	2022-02-07T00:00:00Z
Anastrepha obliqua	95512	68670737	69395	GJAH01	TSA	INV	2022-02-07T00:00:00Z
Anastrepha obliqua	95512	75861659	83839	GJAJ01	TSA	INV	2022-02-07T00:00:00Z
Anastrepha pseudoparallela	95517	62378686	72636	GIZG01	TSA	INV	2022-02-07T00:00:00Z
Anastrepha serpentina	43388	63807394	78575	GIZH01	TSA	INV	2022-02-07T00:00:00Z
Anastrepha turpiniae	173579	67810559	67016	GIZI01	TSA	INV	2022-02-07T00:00:00Z
Anastrepha turpiniae	173579	67536682	74156	GJAI01	TSA	INV	2022-02-07T00:00:00Z
Anastrus sempiternus	354765	283000515	618996	DWOB01	WGS	INV	2022-02-17T00:00:00Z
Anax ephippiger	507857	24508205	23466	GCEH01	TSA	INV	2022-03-09T00:00:00Z
Anax imperator	39274	30158800	27228	GCEI01	TSA	INV	2022-03-09T00:00:00Z
Anaxyrus baxteri	302537	201385573	209390	GGUQ01	TSA	VRT	2019-09-09T00:00:00Z
Anaxyrus baxteri	302537	193034108	199011	GGUR01	TSA	VRT	2019-09-09T00:00:00Z
Anaxyrus baxteri	302537	271965644	331616	GGUS01	TSA	VRT	2019-09-09T00:00:00Z
Ancistrocerus nigricornis	76990	210379627	227	CAJZKA01	WGS	INV	2021-09-18T00:00:00Z
Ancistrocerus nigricornis	76990	33488814	28657	GBMD01	TSA	INV	2018-02-13T00:00:00Z
Ancistrus triradiatus	2841045	994062695	9565	JAJAGP01	WGS	VRT	2022-09-08T00:00:00Z
Ancylostoma caninum	29170	465734117	25335	JOJR01	WGS	INV	2018-07-21T00:00:00Z
Ancylostoma ceylanicum	53326	313092710	1736	JARK01	WGS	INV	2016-05-09T00:00:00Z
Ancylostoma ceylanicum	53326	303727273	75939	ASSL01	WGS	INV	2015-03-17T00:00:00Z
Ancylostoma ceylanicum	53326	40562112	93196	GASF01	TSA	INV	2015-03-18T00:00:00Z
Ancylostoma duodenale	51022	322827410	100268	JHON01	WGS	INV	2015-01-16T00:00:00Z
Andesiana lamellata	753268	89065679	161912	GEOA01	TSA	INV	2016-11-28T00:00:00Z
Andesiana lamellata	753268	24564547	49731	GCNW01	TSA	INV	2019-11-05T00:00:00Z
Andinoacara biseriatus	449250	682785894	46099	VUQJ01	WGS	VRT	2020-10-29T00:00:00Z
Andrena bucephala	1542580	218119	8	CANPUK01	WGS	INV	2022-12-16T00:00:00Z
Andrena bucephala	1542580	208197342	3232	CANPUL01	WGS	INV	2022-12-16T00:00:00Z
Andrena camellia	1862692	340729732	50	JAMJVY01	WGS	INV	2023-03-28T00:00:00Z
Andrena cineraria	465493	28007809	36970	GHFW01	TSA	INV	2019-02-27T00:00:00Z
Andrena dorsata	1411666	8212772	154	CAKMYH01	WGS	INV	2022-02-09T00:00:00Z
Andrena dorsata	1411666	215949665	320	CAKMYL01	WGS	INV	2022-02-09T00:00:00Z
Andrena fulva	1411667	433082651	2264	CAMITY01	WGS	INV	2022-09-02T00:00:00Z
Andrena fulva	1411667	91209351	310	CAMITZ01	WGS	INV	2022-09-02T00:00:00Z
Andrena fulva	1411667	28610047	33796	GHFR01	TSA	INV	2019-02-27T00:00:00Z
Andrena haemorrhoa	444401	39405148	395	CAJUZA01	WGS	INV	2021-07-06T00:00:00Z
Andrena haemorrhoa	444401	238273182	985	CAJUZB01	WGS	INV	2021-07-06T00:00:00Z
Andrena haemorrhoa	444401	31728767	40909	GHFU01	TSA	INV	2019-02-27T00:00:00Z
Andrena haemorrhoa	444401	30381576	39238	GHGA01	TSA	INV	2019-02-27T00:00:00Z
Andrena hattorfiana	1126402	7027385	118	CALYFQ02	WGS	INV	2022-09-02T00:00:00Z
Andrena hattorfiana	1126402	35513745	220	CALYIL02	WGS	INV	2022-09-02T00:00:00Z
Andrena minutula	1190802	30515470	351	CAKMYJ01	WGS	INV	2022-02-09T00:00:00Z
Andrena minutula	1190802	283595785	1612	CAKMYM01	WGS	INV	2022-02-09T00:00:00Z
Andrena trimmerana	1431430	378417964	1153	CATNUM01	WGS	INV	2023-05-07T00:00:00Z
Andrena trimmerana	1431430	55104819	219	CATNUO01	WGS	INV	2023-05-07T00:00:00Z
Andrena vaga	124134	29428733	25569	GBLF01	TSA	INV	2017-03-24T00:00:00Z
Andricus coriarius	75157	1372018826	336354	CAKNWT01	WGS	INV	2022-03-10T00:00:00Z
Andricus curvator	75152	1713399768	2458281	UWUC01	WGS	INV	2018-11-09T00:00:00Z
Andricus curvator	75152	1666410088	61955	CAKNYM01	WGS	INV	2022-03-03T00:00:00Z
Andricus grossulariae	75169	1877197301	2221463	UWOF01	WGS	INV	2018-10-23T00:00:00Z
Andricus grossulariae	75169	989550339	345884	CAKNWS01	WGS	INV	2022-03-10T00:00:00Z
Andricus grossulariae	75169	1412754889	229755	JAABKJ01	WGS	INV	2020-03-23T00:00:00Z
Andricus inflator	75162	1869313883	2014038	UWNZ01	WGS	INV	2018-10-23T00:00:00Z
Andricus kollari	75165	1186781989	352085	CAKNWW01	WGS	INV	2022-03-21T00:00:00Z
Andricus pictus	330977	139036065	85775	CAKNWV01	WGS	INV	2022-03-03T00:00:00Z
Andricus quercuscalicis	75158	30242759	22611	GBNY01	TSA	INV	2017-03-24T00:00:00Z
Andricus quercusramuli	199937	1937566174	2578124	UWUE01	WGS	INV	2018-11-09T00:00:00Z
Andricus quercusramuli	199937	1626963434	87091	CAKNXH01	WGS	INV	2022-03-03T00:00:00Z
Andricus quercustozae	75166	1038231360	329044	CAKNWU01	WGS	INV	2022-03-10T00:00:00Z
Androctonus mauritanicus	6859	1083961664	460271	WUQG02	WGS	INV	2022-11-24T00:00:00Z
Andrographis paniculata	175694	269408435	257	SMLO01	WGS	PLN	2019-03-19T00:00:00Z
Andrographis paniculata	175694	284308021	270	WJEG01	WGS	PLN	2019-12-27T00:00:00Z
Andrographis paniculata	175694	88933560	83800	GBJB01	TSA	PLN	2015-03-26T00:00:00Z
Andrographis paniculata	175694	19822291	22402	GBSY01	TSA	PLN	2016-11-21T00:00:00Z
Anelosimus crassipes	1112379	65584870	43767	IAJC01	TSA	INV	2022-11-17T00:00:00Z
Anelosimus crassipes	1112379	61231705	42569	IAML01	TSA	INV	2022-11-17T00:00:00Z
Anelosimus exiguus	2337285	51932421	43137	IAXJ01	TSA	INV	2022-11-17T00:00:00Z
Anelosimus exiguus	2337285	58590503	34246	IAXR01	TSA	INV	2022-11-17T00:00:00Z
Anelosimus exiguus	2337285	46319396	40724	ICIE01	TSA	INV	2022-11-17T00:00:00Z
Anelosimus iwawakiensis	2337286	56333969	46066	IBVO01	TSA	INV	2022-11-17T00:00:00Z
Anelosimus studiosus	411427	2033432615	956665	VSFD01	WGS	INV	2019-09-05T00:00:00Z
Anelosimus studiosus	411427	65901565	48101	IAPX01	TSA	INV	2022-11-17T00:00:00Z
Anelosimus studiosus	411427	67650214	48026	IBWJ01	TSA	INV	2022-11-17T00:00:00Z
Anelosimus vittatus	1906963	48881386	44400	IBXC01	TSA	INV	2022-11-17T00:00:00Z
Anemone flaccida	174164	61514989	46945	GEKW01	TSA	PLN	2016-04-05T00:00:00Z
Anemonia viridis	51769	400604393	1095173	OCZR01	WGS	INV	2018-07-31T00:00:00Z
Anemonia viridis	51769	82153155	154347	GGLT01	TSA	INV	2018-10-03T00:00:00Z
Anemonia viridis	51769	82021220	154015	GHCD01	TSA	INV	2018-12-11T00:00:00Z
Anepsion depressum	1305600	69119541	38277	ICFY01	TSA	INV	2022-11-17T00:00:00Z
Anepsion japonicum	1305599	76711364	40596	IBDU01	TSA	INV	2022-11-17T00:00:00Z
Anethum foeniculum	2849586	1011385054	300977	PHNY01	WGS	PLN	2021-09-21T00:00:00Z
Anethum foeniculum	2849586	90474527	79093	GGAC01	TSA	PLN	2018-08-24T00:00:00Z
Aneuroscelio sp. ZL-2020	2729016	217949494	337565	JABFOT01	WGS	INV	2022-04-05T00:00:00Z
Angiostrongylus cantonensis	6313	260768283	17280	JRZF01	WGS	INV	2016-11-18T00:00:00Z
Angiostrongylus cantonensis	6313	293306699	26577	MQTX01	WGS	INV	2019-12-09T00:00:00Z
Angiostrongylus cantonensis	6313	6254899	20604	ANFR01	WGS	INV	2014-08-06T00:00:00Z
Angiostrongylus costaricensis	334426	262782696	6384	UYYA01	WGS	INV	2018-12-05T00:00:00Z
Angiostrongylus vasorum	321387	279948744	468	JADANN01	WGS	INV	2021-06-09T00:00:00Z
Angophora floribunda	34308	388366942	37	JABKBU01	WGS	PLN	2020-08-14T00:00:00Z
Anguilla anguilla	7936	885128485	865467	AZBK01	WGS	VRT	2014-05-20T00:00:00Z
Anguilla anguilla	7936	129682999	77239	GGCL01	TSA	VRT	2019-06-26T00:00:00Z
Anguilla anguilla	7936	111496143	50623	GGGR01	TSA	VRT	2019-02-27T00:00:00Z
Anguilla anguilla	7936	509867794	822832	GHAH01	TSA	VRT	2018-10-24T00:00:00Z
Anguilla anguilla	7936	150126068	60179	GFIC01	TSA	VRT	2017-03-14T00:00:00Z
Anguilla anguilla	7936	45243293	109227	GBXM01	TSA	VRT	2015-04-01T00:00:00Z
Anguilla anguilla	7936	1033223415	1466	JAFIRN01	WGS	VRT	2021-05-12T00:00:00Z
Anguilla anguilla	7936	979029243	53	JABVMG01	WGS	VRT	2020-06-18T00:00:00Z
Anguilla anguilla	7936	965248483	2338	JABVMH01	WGS	VRT	2020-06-12T00:00:00Z
Anguilla japonica	7937	1028695784	86	JANEZO01	WGS	VRT	2022-09-14T00:00:00Z
Anguilla japonica	7937	1181134743	50457	VDMF01	WGS	VRT	2019-06-18T00:00:00Z
Anguilla japonica	7937	1024967970	822110	AVPY01	WGS	VRT	2014-08-26T00:00:00Z
Anguilla japonica	7937	1151067796	195366	BDQN01	WGS	VRT	2017-10-20T00:00:00Z
Anguilla japonica	7937	966917315	83292	BEWY01	WGS	VRT	2018-09-15T00:00:00Z
Anguilla japonica	7937	35636560	82081	BEYV01	WGS	VRT	2018-02-03T00:00:00Z
Anguilla japonica	7937	1037276149	10158	CAKAEG01	WGS	VRT	2021-09-28T00:00:00Z
Anguilla japonica	7937	88779895	101732	GFCL01	TSA	VRT	2016-12-20T00:00:00Z
Anguilla japonica	7937	88496698	94414	GFCM01	TSA	VRT	2016-12-20T00:00:00Z
Anguilla japonica	7937	13279461	18437	GAGT01	TSA	VRT	2013-07-25T00:00:00Z
Anguilla marmorata	7939	882006954	38756	CAAKNA01	WGS	VRT	2020-02-07T00:00:00Z
Anguilla megastoma	86963	877765645	40052	CAAKMX01	WGS	VRT	2020-02-07T00:00:00Z
Anguilla obscura	86964	882390062	43284	CAAKMZ01	WGS	VRT	2020-02-07T00:00:00Z
Anguilla rostrata	7938	1413032609	79209	LTYT01	WGS	VRT	2016-04-04T00:00:00Z
Anguilla rostrata	7938	975437971	1093	JAGKSO01	WGS	VRT	2021-09-30T00:00:00Z
Anguillicola crassus	620897	17185256	8085	GGFI01	TSA	INV	2018-01-30T00:00:00Z
Anguina tritici	166006	169059770	77681	JAKMXJ01	WGS	INV	2023-03-22T00:00:00Z
Anhinga anhinga	56067	1183194070	10030	WBMU01	WGS	VRT	2020-07-10T00:00:00Z
Anhinga rufa	317792	1014091971	249520	VZTV01	WGS	VRT	2020-07-10T00:00:00Z
Anilios bicolor	261711	54127148	111470	GJON01	TSA	VRT	2022-10-03T00:00:00Z
Anilios bituberculatus	261707	1642818667	1428882	JAJFZI01	WGS	VRT	2022-02-23T00:00:00Z
Anisakis pegreffii	303229	370398084	264787	HBXC01	TSA	INV	2022-03-09T00:00:00Z
Anisakis simplex	6269	126869778	42005	UYRR01	WGS	INV	2018-12-05T00:00:00Z
Anisakis simplex	6269	144322410	62413	UTAD01	WGS	INV	2019-08-02T00:00:00Z
Anisarthron barbipes	2715050	38021092	48550	GIQS01	TSA	INV	2021-06-16T00:00:00Z
Anisodus acutangulus	402998	1260858109	62	JAJAGQ01	WGS	PLN	2023-04-18T00:00:00Z
Anisolabis maritima	62749	587101098	171564	JAAAKE02	WGS	INV	2022-11-21T00:00:00Z
Anisus vortex	271030	745768514	3406	CASBPQ01	WGS	INV	2023-02-04T00:00:00Z
Anisus vortex	271030	32387213	217	CASBPS01	WGS	INV	2023-02-04T00:00:00Z
Anisynta dominula	1371081	106536803	305272	DWUK01	WGS	INV	2022-02-17T00:00:00Z
Anneissia japonica	1529436	589628371	76727	VUNX01	WGS	INV	2020-03-23T00:00:00Z
Anneissia japonica	1529436	52918411	39222	GAZO01	TSA	INV	2014-05-22T00:00:00Z
Anneslea fragrans	182331	193062910	445143	GFTZ01	TSA	PLN	2018-09-07T00:00:00Z
Anniella stebbinsi	2202111	1890507581	134	JARDYG01	WGS	VRT	2023-03-14T00:00:00Z
Anniella stebbinsi	2202111	1891076299	91	JARDYH01	WGS	VRT	2023-03-14T00:00:00Z
Annulipalpia sp. AD-2013	1499517	52609922	87370	GATX01	TSA	INV	2014-11-17T00:00:00Z
Anodorhynchus hyacinthinus	51900	1105970761	259732	WOUG02	WGS	VRT	2023-01-30T00:00:00Z
Anoectochilus roxburghii	569774	26951557	65857	GETU01	TSA	PLN	2022-08-30T00:00:00Z
Anolis carolinensis	28377	1701336547	41986	AAWZ02	WGS	VRT	2014-08-11T00:00:00Z
Anolis carolinensis	28377	12056	7	GFSM01	TSA	VRT	2017-11-29T00:00:00Z
Anolis carolinensis	28377	583776503	1560902	GACT01	TSA	VRT	2013-03-19T00:00:00Z
Anolis carolinensis	28377	94685624	110227	GADN01	TSA	VRT	2013-03-14T00:00:00Z
Anolis carolinensis	28377	148835973	153960	GADO01	TSA	VRT	2013-03-15T00:00:00Z
Anolis carolinensis	28377	120574608	118836	GAEC01	TSA	VRT	2013-03-14T00:00:00Z
Anolis carolinensis	28377	72356141	74717	GAED01	TSA	VRT	2013-03-14T00:00:00Z
Anolis carolinensis	28377	37818900	29603	GAFD01	TSA	VRT	2013-03-14T00:00:00Z
Anolis carolinensis	28377	102214961	81261	GAFK01	TSA	VRT	2013-03-14T00:00:00Z
Anolis carolinensis	28377	235220214	203085	GAFL01	TSA	VRT	2013-03-15T00:00:00Z
Anolis carolinensis	28377	101838177	79239	GAFM01	TSA	VRT	2013-03-14T00:00:00Z
Anolis carolinensis	28377	79761643	88659	GAFN01	TSA	VRT	2013-03-14T00:00:00Z
Anolis carolinensis	28377	236376216	271597	GAFZ01	TSA	VRT	2013-03-15T00:00:00Z
Anolis carolinensis	28377	296109478	735899	GAGA01	TSA	VRT	2013-03-16T00:00:00Z
Anolis carolinensis	28377	468812569	1195995	GAGB01	TSA	VRT	2013-03-15T00:00:00Z
Anolis carolinensis	28377	636564512	1810250	GAGC01	TSA	VRT	2013-03-19T00:00:00Z
Anolis carolinensis	28377	397339152	1069118	GAGG01	TSA	VRT	2013-03-19T00:00:00Z
Anolis carolinensis	28377	79906341	88785	GBBS01	TSA	VRT	2014-04-04T00:00:00Z
Anolis carolinensis	28377	72401486	74863	GBDD01	TSA	VRT	2014-04-18T00:00:00Z
Anolis carolinensis	28377	236484934	271825	GBDE01	TSA	VRT	2014-04-21T00:00:00Z
Anolis carolinensis	28377	102610091	81503	GBDT01	TSA	VRT	2014-04-24T00:00:00Z
Anolis carolinensis	28377	102656018	80219	GBDU01	TSA	VRT	2014-04-24T00:00:00Z
Anolis carolinensis	28377	235722963	203361	GBDV01	TSA	VRT	2014-04-24T00:00:00Z
Anolis carolinensis	28377	149221613	154135	GBDW01	TSA	VRT	2014-04-25T00:00:00Z
Anolis sagrei ordinatus	2962859	1926425113	3738	JANCLY01	WGS	VRT	2022-10-05T00:00:00Z
Anomala sp. AD-2015	1661488	32604414	37395	GDNY01	TSA	INV	2019-12-17T00:00:00Z
Anomalopteryx didiformis	8811	1190759065	1909	SZQC01	WGS	VRT	2019-07-12T00:00:00Z
Anomalopteryx didiformis	8811	1189933016	1843	SZQD01	WGS	VRT	2019-07-12T00:00:00Z
Anomoia purmunda	103414	760873813	2741	CATOUP01	WGS	INV	2023-06-12T00:00:00Z
Anoncus sp. PSUC_FEM 10030000	2726092	226362449	332749	JABSMQ01	WGS	INV	2021-06-16T00:00:00Z
Anopheles albimanus	7167	163585001	2861	APCK01	WGS	INV	2022-03-15T00:00:00Z
Anopheles albimanus	7167	172602732	7	JABUIU01	WGS	INV	2020-08-06T00:00:00Z
Anopheles albimanus	7167	3802539	31	JABUIV01	WGS	INV	2020-07-27T00:00:00Z
Anopheles albimanus	7167	170170859	153	JADGIR01	WGS	INV	2020-11-23T00:00:00Z
Anopheles aquasalis	42839	162944031	16504	NJHH01	WGS	INV	2017-12-21T00:00:00Z
Anopheles aquasalis	42839	3215508	86	CALSDQ01	WGS	INV	2022-06-09T00:00:00Z
Anopheles aquasalis	42839	175411823	325	CALSEH01	WGS	INV	2022-06-09T00:00:00Z
Anopheles aquasalis	42839	3112531	3464	GAMD01	TSA	INV	2015-07-20T00:00:00Z
Anopheles arabiensis	7173	211443117	10179	APCN01	WGS	INV	2022-03-15T00:00:00Z
Anopheles arabiensis	7173	256823316	102	JADFTQ01	WGS	INV	2021-03-10T00:00:00Z
Anopheles atroparvus	41427	277747802	224	CAJZCY01	WGS	INV	2021-09-24T00:00:00Z
Anopheles atroparvus	41427	188952560	9880	AXCP01	WGS	INV	2022-03-15T00:00:00Z
Anopheles atroparvus	41427	104747681	546	CALTRM01	WGS	INV	2023-01-08T00:00:00Z
Anopheles atroparvus	41427	220078729	669	JADGIQ01	WGS	INV	2020-11-23T00:00:00Z
Anopheles bellator	139047	11542169	2982	CALSEL02	WGS	INV	2023-03-01T00:00:00Z
Anopheles braziliensis	58242	12806113	12570	GGFM01	TSA	INV	2018-01-30T00:00:00Z
Anopheles bwambae	42896	288964812	30458	SIXB01	WGS	INV	2019-07-16T00:00:00Z
Anopheles christyi	43041	169987185	31483	APCM01	WGS	INV	2022-03-15T00:00:00Z
Anopheles coluzzii	1518534	340556243	1035	RWKB01	WGS	INV	2022-05-27T00:00:00Z
Anopheles coluzzii	1518534	209529067	27063	ABKP02	WGS	INV	2022-03-15T00:00:00Z
Anopheles coluzzii	1518534	13056781	125	CALSDT01	WGS	INV	2022-06-09T00:00:00Z
Anopheles coluzzii	1518534	113471412	903	CALSEE01	WGS	INV	2022-06-09T00:00:00Z
Anopheles coluzzii	1518534	245361604	82	JADFFJ01	WGS	INV	2021-01-06T00:00:00Z
Anopheles coluzzii	1518534	273423912	200	JADFTP01	WGS	INV	2021-03-10T00:00:00Z
Anopheles coluzzii	1518534	236320436	28	JADQCV01	WGS	INV	2020-12-20T00:00:00Z
Anopheles coluzzii	1518534	244905343	19	JADQCW01	WGS	INV	2020-12-20T00:00:00Z
Anopheles coluzzii	1518534	242999731	20	JADQCX01	WGS	INV	2020-12-20T00:00:00Z
Anopheles coluzzii	1518534	236561446	24	JADQCY01	WGS	INV	2020-12-20T00:00:00Z
Anopheles coluzzii	1518534	246885699	14	JADQCZ01	WGS	INV	2020-12-20T00:00:00Z
Anopheles coluzzii	1518534	252369346	107	JADQDA01	WGS	INV	2020-12-20T00:00:00Z
Anopheles coustani	139045	58494945	416	CALSDV02	WGS	INV	2023-03-01T00:00:00Z
Anopheles coustani	139045	229140800	620	CALSDW01	WGS	INV	2022-06-09T00:00:00Z
Anopheles cracens	123217	325760517	104896	LULB01	WGS	INV	2017-04-14T00:00:00Z
Anopheles cruzii	68878	22255661	5085	CALSDP01	WGS	INV	2022-06-09T00:00:00Z
Anopheles culicifacies	139723	187158781	24182	AXCM01	WGS	INV	2022-03-15T00:00:00Z
Anopheles darlingi	43151	136935538	2220	ADMH02	WGS	INV	2014-07-29T00:00:00Z
Anopheles darlingi	43151	2013416	62	CALSDZ01	WGS	INV	2022-06-09T00:00:00Z
Anopheles darlingi	43151	176521697	418	CALSEC01	WGS	INV	2022-06-09T00:00:00Z
Anopheles darlingi	43151	16110663	16305	GGFL01	TSA	INV	2018-01-30T00:00:00Z
Anopheles dirus	7168	197741572	8257	APCL01	WGS	INV	2022-03-15T00:00:00Z
Anopheles epiroticus	199890	202632179	7793	APCJ01	WGS	INV	2022-03-15T00:00:00Z
Anopheles farauti	69004	161383639	27543	JXXC01	WGS	INV	2015-03-19T00:00:00Z
Anopheles farauti	69004	175822780	2984	AXCN02	WGS	INV	2022-03-15T00:00:00Z
Anopheles farauti No. 4	59191	146379160	14407	JXWZ01	WGS	INV	2015-03-19T00:00:00Z
Anopheles fontenillei	2494418	232632941	69201	VTWG01	WGS	INV	2019-11-08T00:00:00Z
Anopheles funestus	62324	444543995	9175	RCWQ01	WGS	INV	2018-12-20T00:00:00Z
Anopheles funestus	62324	190015440	9880	APCI01	WGS	INV	2016-11-29T00:00:00Z
Anopheles funestus	62324	226239815	542	CALSDO01	WGS	INV	2022-06-09T00:00:00Z
Anopheles funestus	62324	40913602	326	CALSEJ01	WGS	INV	2022-06-09T00:00:00Z
Anopheles funestus-like sensu Spillings et al. (2009)	2763070	229176485	10919	STHE01	WGS	INV	2022-01-25T00:00:00Z
Anopheles gambiae	7165	293748066	8000	LCWJ01	WGS	INV	2016-02-02T00:00:00Z
Anopheles gambiae	7165	220394761	54385	JXPR01	WGS	INV	2015-05-28T00:00:00Z
Anopheles gambiae	7165	228040215	25058	ABKQ02	WGS	INV	2014-08-06T00:00:00Z
Anopheles gambiae	7165	207232648	686	CALSDS01	WGS	INV	2022-06-09T00:00:00Z
Anopheles gambiae	7165	19006784	187	CALSDY02	WGS	INV	2022-09-02T00:00:00Z
Anopheles gambiae	7165	38393017	14893	GIBN01	TSA	INV	2019-11-26T00:00:00Z
Anopheles gambiae	7165	376086	364	HACL01	TSA	INV	2017-09-29T00:00:00Z
Anopheles gambiae str. PEST	180454	328942838	69724	AAAB01	WGS	INV	2014-08-05T00:00:00Z
Anopheles koliensis	30065	151110088	41925	JXXB01	WGS	INV	2015-03-19T00:00:00Z
Anopheles longipalpis	412009	347088589	27768	STHD01	WGS	INV	2020-12-22T00:00:00Z
Anopheles maculatus	74869	441164621	67505	LULA01	WGS	INV	2017-04-14T00:00:00Z
Anopheles maculatus	74869	131831173	53883	AXCL01	WGS	INV	2022-03-15T00:00:00Z
Anopheles maculipalpis	1496333	11107966	167	CALSDU01	WGS	INV	2022-06-09T00:00:00Z
Anopheles maculipalpis	1496333	215811166	635	CALSEK01	WGS	INV	2022-06-09T00:00:00Z
Anopheles marajoara	58244	19653024	15037	GGFJ01	TSA	INV	2018-01-30T00:00:00Z
Anopheles marshallii	1521116	29203678	285	CALSDX01	WGS	INV	2022-06-09T00:00:00Z
Anopheles marshallii	1521116	217350203	675	CALSEI01	WGS	INV	2022-06-09T00:00:00Z
Anopheles melas	34690	203428649	29466	AXCO02	WGS	INV	2022-03-15T00:00:00Z
Anopheles merus	30066	217320349	13111	AXCQ02	WGS	INV	2022-03-15T00:00:00Z
Anopheles merus	30066	300125122	1327	JADFFO01	WGS	INV	2021-04-27T00:00:00Z
Anopheles minimus	112268	186406809	6168	APHL01	WGS	INV	2022-03-15T00:00:00Z
Anopheles moucheti	186751	57036950	342	CALSEA01	WGS	INV	2022-06-09T00:00:00Z
Anopheles moucheti	186751	224236982	576	CALSED01	WGS	INV	2022-06-09T00:00:00Z
Anopheles nili	185578	98320046	51048	ATLZ01	WGS	INV	2014-08-06T00:00:00Z
Anopheles nili	185578	164693322	467	CALSFZ01	WGS	INV	2022-06-09T00:00:00Z
Anopheles nili	185578	25208350	153	CALSGA01	WGS	INV	2022-06-09T00:00:00Z
Anopheles nuneztovari	30067	188820	284	GGFF01	TSA	INV	2018-01-30T00:00:00Z
Anopheles parensis	162637	278993627	21348	STHC01	WGS	INV	2020-12-22T00:00:00Z
Anopheles punctulatus	30068	146157495	20774	JXXA01	WGS	INV	2015-03-19T00:00:00Z
Anopheles quadriannulatus	34691	208966669	17590	APCH01	WGS	INV	2022-03-15T00:00:00Z
Anopheles quadrimaculatus	7166	19277482	18724	GBTE01	TSA	INV	2014-11-06T00:00:00Z
Anopheles rivulorum	70327	321497600	34747	STHB01	WGS	INV	2021-06-17T00:00:00Z
Anopheles sinensis	74873	190280839	30931	AXCK02	WGS	INV	2022-03-15T00:00:00Z
Anopheles sinensis	74873	214511315	27445	ATLV01	WGS	INV	2014-07-28T00:00:00Z
Anopheles sinensis	74873	14529397	28133	GAFE01	TSA	INV	2015-07-20T00:00:00Z
Anopheles sinensis	74873	21959904	38463	GBEO01	TSA	INV	2014-07-24T00:00:00Z
Anopheles sinensis	74873	24534251	45217	GDKS01	TSA	INV	2015-08-26T00:00:00Z
Anopheles sp. NFL-2015	1712672	258496555	18327	STHF01	WGS	INV	2020-12-22T00:00:00Z
Anopheles stephensi	30069	307476708	12	JALIHK01	WGS	INV	2022-04-22T00:00:00Z
Anopheles stephensi	30069	196183657	8946	APCG01	WGS	INV	2022-03-15T00:00:00Z
Anopheles stephensi	30069	209483518	31761	ALPR02	WGS	INV	2014-10-22T00:00:00Z
Anopheles stephensi	30069	243475713	495	JABEOT01	WGS	INV	2020-06-09T00:00:00Z
Anopheles stephensi	30069	2979281	3169	GBVY01	TSA	INV	2015-06-29T00:00:00Z
Anopheles stephensi	30069	220673503	22866	JADFFN01	WGS	INV	2021-03-24T00:00:00Z
Anopheles stephensi	30069	223907960	948	JAIQDY01	WGS	INV	2021-11-17T00:00:00Z
Anopheles triannulatus	58253	22282004	15820	GGFK01	TSA	INV	2018-01-30T00:00:00Z
Anopheles vaneedeni	62325	308715197	22626	STHA01	WGS	INV	2020-12-22T00:00:00Z
Anopheles ziemanni	345580	58494945	416	CALSEB02	WGS	INV	2023-03-01T00:00:00Z
Anopheles ziemanni	345580	224751855	473	CALSEF01	WGS	INV	2022-06-09T00:00:00Z
Anoplius nigerrimus	1667466	486559160	2549	CAJZBO02	WGS	INV	2022-05-02T00:00:00Z
Anoplius nigerrimus	1667466	346774533	1187	CAJZBX01	WGS	INV	2021-09-11T00:00:00Z
Anoplocephala perfoliata	218192	56821994	74406	GJFT01	TSA	INV	2021-07-20T00:00:00Z
Anoplocnemis curvipes	1291514	8051081	11704	GAJV01	TSA	INV	2015-07-20T00:00:00Z
Anoplogaster cornuta	88656	404844788	108625	CABFOP01	WGS	VRT	2019-06-13T00:00:00Z
Anoplogonius nigricollis	1585353	13678498	19379	GCYN01	TSA	INV	2018-11-30T00:00:00Z
Anoplolepis gracilipes	354296	234485207	1291	JAOBUE01	WGS	INV	2023-02-16T00:00:00Z
Anoplolepis gracilipes	354296	235423743	19254	JAOBUF01	WGS	INV	2023-02-17T00:00:00Z
Anoplophora chinensis	217632	39378185	57423	GFXC01	TSA	INV	2018-05-01T00:00:00Z
Anoplophora glabripennis	217634	679792082	26748	AQHT02	WGS	INV	2017-12-13T00:00:00Z
Anoplophora glabripennis	217634	9269803	8595	GALX01	TSA	INV	2013-10-18T00:00:00Z
Anoplopoma fimbria	229290	653472550	8212	JAPDVQ01	WGS	VRT	2023-02-16T00:00:00Z
Anoplopoma fimbria	229290	784187114	26624	AWGY02	WGS	VRT	2020-10-05T00:00:00Z
Anoplopoma fimbria	229290	68753442	47327	GAJJ01	TSA	VRT	2015-01-29T00:00:00Z
Anoplotermes banksi	948538	158786286	190701	GHYX01	TSA	INV	2019-12-04T00:00:00Z
Anoplotrupes stercorosus	260542	30464682	26843	GDML01	TSA	INV	2019-12-17T00:00:00Z
Anorthoa munda	988060	532512	11	CAMAOL01	WGS	INV	2022-09-02T00:00:00Z
Anorthoa munda	988060	932504803	1335	CAMAOM01	WGS	INV	2022-09-02T00:00:00Z
Anorus arizonicus	1661808	25553744	22370	GDLJ01	TSA	INV	2017-10-06T00:00:00Z
Anostostoma australasiae	1661809	20470068	32690	GDYN01	TSA	INV	2020-09-08T00:00:00Z
Anotogaster sieboldii	126220	16521850	26792	GCKJ01	TSA	INV	2022-03-09T00:00:00Z
Anoura caudifer	27642	2206589520	337255	PVKU01	WGS	MAM	2019-01-16T00:00:00Z
Anser brachyrhynchus	132585	1116992394	2723	NXHY01	WGS	VRT	2017-10-19T00:00:00Z
Anser cygnoides	8845	1100672068	64862	LABU01	WGS	VRT	2017-06-05T00:00:00Z
Anser cygnoides	8845	1153444501	1263	JAOVSJ01	WGS	VRT	2022-11-23T00:00:00Z
Anser cygnoides	8845	1113895350	2119	WTSS01	WGS	VRT	2020-10-27T00:00:00Z
Anser cygnoides	8845	1278045749	486	JAHRXI01	WGS	VRT	2022-09-25T00:00:00Z
Anser cygnoides domesticus	381198	1083755482	91943	AOGC01	WGS	VRT	2015-05-07T00:00:00Z
Anser indicus	8846	1129455536	484	JANSVC01	WGS	VRT	2022-10-06T00:00:00Z
Anser indicus	8846	1143091872	10527	VDDG01	WGS	VRT	2019-06-11T00:00:00Z
Anseranas semipalmata	8851	1131429283	11789	VXAA01	WGS	VRT	2020-07-10T00:00:00Z
Antecaridina lauensis	399419	89739882	111034	GHBJ01	TSA	INV	2018-11-08T00:00:00Z
Antechinomys laniger	60701	1677561	2007	CAJGJB01	WGS	MAM	2021-02-21T00:00:00Z
Antechinomys laniger	60701	1501661	2031	CAJGSJ01	WGS	MAM	2021-02-21T00:00:00Z
Antechinomys laniger	60701	1744982	1976	CAJGTG01	WGS	MAM	2021-02-21T00:00:00Z
Antechinomys laniger	60701	250073	446	CAJGUM01	WGS	MAM	2021-02-21T00:00:00Z
Antechinus agilis	400481	1767894	1996	CAJGTJ01	WGS	MAM	2021-02-21T00:00:00Z
Antechinus bellus	71384	1557310	1963	CAJGRL01	WGS	MAM	2021-02-21T00:00:00Z
Antechinus flavipes	38775	1656040	1972	CAJGRQ01	WGS	MAM	2021-02-21T00:00:00Z
Antechinus flavipes	38775	3192697873	485	JADWMD01	WGS	MAM	2022-10-27T00:00:00Z
Antechinus godmani	71385	2136916	2057	CAJGIF01	WGS	MAM	2021-02-21T00:00:00Z
Antechinus leo	65606	1726168	1958	CAJGRT01	WGS	MAM	2021-02-21T00:00:00Z
Antechinus mimetes	2547910	1506544	2066	CAJGJC01	WGS	MAM	2021-02-21T00:00:00Z
Antechinus minimus	71386	1665354	1972	CAJGTL01	WGS	MAM	2021-02-21T00:00:00Z
Antechinus stuartii	9283	2239626	2019	CAJGQU01	WGS	MAM	2021-02-21T00:00:00Z
Antechinus stuartii	9283	3216561012	106199	JACYGW01	WGS	MAM	2021-01-19T00:00:00Z
Antennarius maculatus	882753	549949511	155	JABVMC01	WGS	VRT	2020-06-18T00:00:00Z
Antennarius maculatus	882753	530348589	2294	JABVMD01	WGS	VRT	2020-06-12T00:00:00Z
Antennarius striatus	241820	441856641	70398	OMNX01	WGS	VRT	2018-03-08T00:00:00Z
Anteon gaullei	1661810	28080065	34368	GDNC01	TSA	INV	2021-01-13T00:00:00Z
Anthaenantia lanata	158113	40063003	50831	GJVF01	TSA	PLN	2023-04-27T00:00:00Z
Antheraea assamensis	91021	23419029	35722	GBZC01	TSA	INV	2015-03-26T00:00:00Z
Antheraea mylitta	34739	698407906	16774	JACEII01	WGS	INV	2020-10-19T00:00:00Z
Antheraea pernyi	7119	737460770	103045	MNPI01	WGS	INV	2020-12-11T00:00:00Z
Antheraea pernyi	7119	23863637	42692	GFCX01	TSA	INV	2017-01-04T00:00:00Z
Antheraea pernyi	7119	31993434	46237	GBZF01	TSA	INV	2015-03-26T00:00:00Z
Antheraea yamamai	7121	29504188	43544	GBZJ01	TSA	INV	2015-03-26T00:00:00Z
Anthidium manicatum	473950	27880352	22793	GBOJ01	TSA	INV	2017-03-24T00:00:00Z
Anthidium xuezhongi	2840466	189140731	23	JAHHWS01	WGS	INV	2022-03-04T00:00:00Z
Anthoceros angustus	48387	119138485	445	VJWM01	WGS	PLN	2020-02-21T00:00:00Z
Anthochaera phrygia	2020318	815187911	265121	VJPA01	WGS	VRT	2019-10-31T00:00:00Z
Anthocharis cardamines	227532	6152730	23	CAJQEZ01	WGS	INV	2021-04-14T00:00:00Z
Anthocharis cardamines	227532	327220656	234	CAJQFN01	WGS	INV	2021-04-14T00:00:00Z
Anthocharis cardamines	227532	26846998	33903	GCNX01	TSA	INV	2019-11-05T00:00:00Z
Anthocomus equestris	1587031	30088396	25541	GDMD01	TSA	INV	2019-12-17T00:00:00Z
Anthonomus grandis	7044	13701708	20246	GABY01	TSA	INV	2013-12-02T00:00:00Z
Anthonomus grandis grandis	2921223	697539286	304	JAKYJU02	WGS	INV	2022-08-26T00:00:00Z
Anthonomus grandis grandis	2921223	371797639	6139	JAKYJV02	WGS	INV	2022-08-26T00:00:00Z
Anthonomus grandis thurberiae	2921224	738372295	569	JASJMR01	WGS	INV	2023-06-05T00:00:00Z
Anthonomus grandis thurberiae	2921224	619641420	2288	JASJMS01	WGS	INV	2023-05-24T00:00:00Z
Anthophora plumipes	478167	286087170	1040	CATORF01	WGS	INV	2023-06-02T00:00:00Z
Anthophora plumipes	478167	30778652	29661	GBTM01	TSA	INV	2017-03-24T00:00:00Z
Anthopleura elegantissima	6110	233919486	224124	GBXJ01	TSA	INV	2014-11-20T00:00:00Z
Anthopleura elegantissima	6110	110645889	155985	GBYC01	TSA	INV	2015-01-22T00:00:00Z
Anthopleura sola	160748	288970335	270	JALHLI01	WGS	INV	2022-05-12T00:00:00Z
Anthopleura sola	160748	299691816	556	JALHLJ01	WGS	INV	2022-05-12T00:00:00Z
Anthopleura sola	160748	9958706	89	JABJWW01	WGS	INV	2020-12-15T00:00:00Z
Anthoptus insignis	705135	357076396	560262	DWRH01	WGS	INV	2022-02-17T00:00:00Z
Anthoscopus minutus	156561	978848727	97620	VWYI01	WGS	VRT	2020-07-10T00:00:00Z
Anthoxanthum odoratum	29661	61916221	83703	GBIE01	TSA	PLN	2015-02-18T00:00:00Z
Anthurium amnicola	1678845	52452095	27959	GDJX01	TSA	PLN	2016-09-08T00:00:00Z
Anthurium andraeanum	226677	109929025	110918	GGPS01	TSA	PLN	2018-06-08T00:00:00Z
Anthurium andraeanum	226677	31199854	40198	GBKP01	TSA	PLN	2014-10-15T00:00:00Z
Anticarsia gemmatalis	129554	4350889	7502	GFUV01	TSA	INV	2018-12-04T00:00:00Z
Anticlea derivata	934824	267322319	196	CANPUO01	WGS	INV	2022-12-16T00:00:00Z
Anticlea derivata	934824	2475808	7	CANPUU01	WGS	INV	2022-12-16T00:00:00Z
Antidorcas marsupialis	59523	3024612899	94522	SJYB01	WGS	MAM	2019-06-24T00:00:00Z
Antigone vipio	2717088	1181556295	51019	BJEU01	WGS	VRT	2020-04-03T00:00:00Z
Antigone vipio	2717088	67017635	56920	ICSW01	TSA	VRT	2022-11-17T00:00:00Z
Antilocapra americana	9891	2669373955	66453	JAJJWP01	WGS	MAM	2021-12-01T00:00:00Z
Antilocapra americana	9891	2955306661	1585152	PVKT02	WGS	MAM	2019-07-15T00:00:00Z
Antilocapra americana	9891	2459503476	48446	SRVM01	WGS	MAM	2019-07-29T00:00:00Z
Antiopella cristata	2773500	96426624	74766	GIBF01	TSA	INV	2022-05-03T00:00:00Z
Antipaluria urichi	270842	43107242	69281	GDCK01	TSA	INV	2019-01-15T00:00:00Z
Antipathozoanthus obscurus	2073167	501183593	610620	JANTBY01	WGS	INV	2022-08-24T00:00:00Z
Antipathozoanthus remengesaui	2073168	492361077	229473	JANSTR01	WGS	INV	2022-09-27T00:00:00Z
Antirrhinum majus	4151	266991058	209649	HBXJ01	TSA	PLN	2023-01-05T00:00:00Z
Antitrichia curtipendula	100465	16168323	327	CATNWC01	WGS	PLN	2023-05-09T00:00:00Z
Antitype chi	988062	616439491	1571	CANAHY01	WGS	INV	2022-11-17T00:00:00Z
Antitype chi	988062	220400	6	CANAHZ01	WGS	INV	2022-11-17T00:00:00Z
Antofagapraocis brevipilis	2991744	58431804	59582	GKEN01	TSA	INV	2023-02-03T00:00:00Z
Antongilia madagassa	1661803	37371556	99410	GDYR01	TSA	INV	2019-09-03T00:00:00Z
Antrodiaetus roretzi	415149	43888763	35796	IBPI01	TSA	INV	2022-11-17T00:00:00Z
Antrodiaetus yesoensis	415152	41090565	36223	IASS01	TSA	INV	2022-11-17T00:00:00Z
Antrodiaetus yesoensis	415152	49105402	38284	IBEE01	TSA	INV	2022-11-17T00:00:00Z
Antrostomus carolinensis	279965	1115277614	125214	JMFU01	WGS	VRT	2022-05-18T00:00:00Z
Antrozous pallidus	9440	2126460045	93	JAOAOB01	WGS	MAM	2023-01-09T00:00:00Z
Antrozous pallidus	9440	2110195735	1839	JAOAOC01	WGS	MAM	2023-01-03T00:00:00Z
Antrozous pallidus	9440	2597469403	902551	VMDP01	WGS	MAM	2019-08-08T00:00:00Z
Anurida maritima	64695	31719699	22076	GAUE02	TSA	INV	2015-10-08T00:00:00Z
Anyphaena ayshides	2337287	60238143	43683	IBZW01	TSA	INV	2022-11-17T00:00:00Z
Anyphaena pugil	2337288	73140669	48318	IBRY01	TSA	INV	2022-11-17T00:00:00Z
Aotus nancymaae	37293	3097886253	1278	JARRCU01	WGS	PRI	2023-06-07T00:00:00Z
Aotus nancymaae	37293	3040582840	1314	JARRCV01	WGS	PRI	2023-06-07T00:00:00Z
Aotus nancymaae	37293	2826766719	2629	JARXKJ01	WGS	PRI	2023-05-26T00:00:00Z
Aotus nancymaae	37293	2714423021	112850	JYKP02	WGS	PRI	2017-06-12T00:00:00Z
Apachyus charteceus	1323532	22737914	33755	GAUW02	TSA	INV	2018-11-30T00:00:00Z
Apaloderma vittatum	57397	1066296614	105649	JMFV01	WGS	VRT	2016-11-17T00:00:00Z
Apalone spinifera	55534	1904720213	6699	JANRFK01	WGS	VRT	2023-06-05T00:00:00Z
Apalone spinifera	55534	1877982184	827040	APJP01	WGS	VRT	2014-08-26T00:00:00Z
Apamea anceps	997526	1212660	14	CATOHH01	WGS	INV	2023-05-26T00:00:00Z
Apamea anceps	997526	611075553	1099	CATOHI01	WGS	INV	2023-05-26T00:00:00Z
Apamea crenata	753153	531527338	340	CATIVQ01	WGS	INV	2023-03-14T00:00:00Z
Apamea crenata	753153	636928	12	CATIVR01	WGS	INV	2023-03-14T00:00:00Z
Apamea epomidion	987880	609075	4	CANNPZ01	WGS	INV	2022-12-02T00:00:00Z
Apamea epomidion	987880	580616124	754	CANNQA01	WGS	INV	2022-12-02T00:00:00Z
Apamea monoglypha	875885	575443327	520	CAJVQP02	WGS	INV	2022-02-13T00:00:00Z
Apamea monoglypha	875885	28940	2	CAJVQS02	WGS	INV	2022-02-13T00:00:00Z
Apamea sordens	689061	613307171	189	CAMAOQ01	WGS	INV	2022-09-02T00:00:00Z
Apantesis nais	464719	620115930	777699	JANTPX01	WGS	INV	2022-08-28T00:00:00Z
Aparatermes sp. AB-2019	2660726	152376021	205147	GHYZ01	TSA	INV	2019-12-06T00:00:00Z
Apeira syringaria	934915	6818148	21	CAKOGW01	WGS	INV	2022-03-27T00:00:00Z
Apeira syringaria	934915	474552682	718	CAKOGY01	WGS	INV	2022-03-27T00:00:00Z
Apeltes quadracus	240154	428916835	889	JAHWDR01	WGS	VRT	2022-01-03T00:00:00Z
Apertochrysa flavifrons flavifrons	2857443	29892968	42283	GCSU01	TSA	INV	2020-06-04T00:00:00Z
Apertochrysa prasina	2857466	44743214	59981	GAVV02	TSA	INV	2015-10-09T00:00:00Z
Apertochrysa ventralis	2857476	33817823	41811	GCSW01	TSA	INV	2020-06-04T00:00:00Z
Aphaenogaster ashmeadi	602585	310333780	5089	NJRQ01	WGS	INV	2018-04-23T00:00:00Z
Aphaenogaster floridana	602633	382861007	6427	NJRP01	WGS	INV	2018-04-23T00:00:00Z
Aphaenogaster fulva	602636	346134187	7032	NJRO01	WGS	INV	2018-04-23T00:00:00Z
Aphaenogaster miamiana	602682	342642954	6922	NJRN01	WGS	INV	2018-04-23T00:00:00Z
Aphaenogaster picea	602698	386044929	6810	NJRM01	WGS	INV	2018-04-23T00:00:00Z
Aphaenogaster rudis	500656	429703865	7665	NJRK01	WGS	INV	2018-04-23T00:00:00Z
Aphaenogaster rudis	500656	395412201	7404	NJRL01	WGS	INV	2018-04-23T00:00:00Z
Aphalara polygoni	1585287	40370361	62105	GCWO01	TSA	INV	2018-11-30T00:00:00Z
Aphanius dispar	37268	149285807	98776	GJEY01	TSA	VRT	2022-08-30T00:00:00Z
Aphanius iberus	136835	1198861116	3025	JAPXFQ01	WGS	VRT	2023-02-08T00:00:00Z
Aphelasterias japonica	194597	32292847	16928	GJPX01	TSA	INV	2022-03-01T00:00:00Z
Aphelenchoides besseyi	269767	44753500	97	JASANI01	WGS	INV	2023-06-09T00:00:00Z
Aphelenchoides besseyi	269767	46759715	32	JAMPIP01	WGS	INV	2022-08-15T00:00:00Z
Aphelenchoides besseyi	269767	47428222	39	JAMPIQ01	WGS	INV	2022-08-15T00:00:00Z
Aphelenchoides besseyi	269767	44715554	28	JAMPIR01	WGS	INV	2022-08-15T00:00:00Z
Aphelenchoides besseyi	269767	44700143	80	JAMPIS01	WGS	INV	2022-08-15T00:00:00Z
Aphelenchoides besseyi	269767	50288344	166	JAPJDV01	WGS	INV	2023-04-07T00:00:00Z
Aphelenchoides bicaudatus	293665	46428382	106	JAMPIN01	WGS	INV	2022-08-15T00:00:00Z
Aphelenchoides fujianensis	1052528	143834322	780	JAMPIO01	WGS	INV	2022-08-15T00:00:00Z
Aphelenchus avenae	70226	264011204	18660	JNEY01	WGS	INV	2021-11-15T00:00:00Z
Aphelinus abdominalis	297830	33122112	39852	GBTK01	TSA	INV	2017-12-20T00:00:00Z
Aphelinus atriplicis	2890793	340310763	467	JAJGQD01	WGS	INV	2021-11-16T00:00:00Z
Aphelinus certus	1041456	333517832	12938	JAJGXB01	WGS	INV	2021-11-17T00:00:00Z
Aphelocheirus aestivalis	280209	24200684	40613	GDEQ01	TSA	INV	2018-11-30T00:00:00Z
Aphelocoma californica	142466	1348500425	1393	JAQMYR01	WGS	VRT	2023-02-07T00:00:00Z
Aphelocoma californica	142466	1191279315	1631	JAQMYS01	WGS	VRT	2023-02-07T00:00:00Z
Aphelocoma coerulescens	39617	1060855343	1701	VZSI01	WGS	VRT	2020-07-10T00:00:00Z
Aphelonotus fraterculus	1585355	28334676	35472	GCWA01	TSA	INV	2018-11-30T00:00:00Z
Aphidius colemani	78482	26415391	32617	GBVE01	TSA	INV	2017-03-24T00:00:00Z
Aphidius ervi	37627	144532283	3865	MKYW01	WGS	INV	2020-12-07T00:00:00Z
Aphidius ervi	37627	138951524	5778	WSYP01	WGS	INV	2020-03-18T00:00:00Z
Aphidius ervi	37627	91701815	135659	GFLW01	TSA	INV	2017-08-07T00:00:00Z
Aphidius ervi	37627	19560	20	GBCU01	TSA	INV	2014-05-07T00:00:00Z
Aphidius gifuensis	684658	156944493	24	JACMRX01	WGS	INV	2020-10-21T00:00:00Z
Aphis craccivora	307492	318873360	17780	VUJU01	WGS	INV	2020-01-09T00:00:00Z
Aphis craccivora	307492	5122728	7649	GAJW01	TSA	INV	2015-07-20T00:00:00Z
Aphis glycines	307491	308063827	3210	VYZN01	WGS	INV	2019-12-17T00:00:00Z
Aphis glycines	307491	303155567	941	JAABOB01	WGS	INV	2020-01-24T00:00:00Z
Aphis glycines	307491	39457176	55368	GBSU01	TSA	INV	2015-11-02T00:00:00Z
Aphis gossypii	80765	294262857	4633	PPXK01	WGS	INV	2022-07-08T00:00:00Z
Aphis gossypii	80765	26480210	10	CAKJTX04	WGS	INV	2022-10-19T00:00:00Z
Aphis gossypii	80765	334914242	504	JAGTJE01	WGS	INV	2021-09-30T00:00:00Z
Aphis gossypii	80765	377585537	480	JAGTJF01	WGS	INV	2021-09-30T00:00:00Z
Aphredoderus sayanus	94919	490500259	96102	JAODUG01	WGS	VRT	2023-01-03T00:00:00Z
Aphrodes bicincta	139525	93861298	158422	GFDZ01	TSA	INV	2020-01-15T00:00:00Z
Aphrophora alni	295201	24690902	39962	GDEN01	TSA	INV	2018-11-30T00:00:00Z
Aphyosemion australe	52653	868348903	12236	SSNS01	WGS	VRT	2019-07-12T00:00:00Z
Apios americana	185702	113183555	96449	GEHN01	TSA	PLN	2016-06-10T00:00:00Z
Apis cerana	7461	223040589	20	JAJTJB01	WGS	INV	2023-03-14T00:00:00Z
Apis cerana	7461	217678304	23	JAPQKY01	WGS	INV	2023-04-06T00:00:00Z
Apis cerana	7461	228315917	2430	JANR01	WGS	INV	2015-11-12T00:00:00Z
Apis cerana	7461	214433208	1619	JADDRF01	WGS	INV	2021-07-28T00:00:00Z
Apis cerana	7461	226970748	882	JAITYW01	WGS	INV	2022-06-28T00:00:00Z
Apis cerana cerana	94128	209222734	21784	JPYL01	WGS	INV	2017-09-13T00:00:00Z
Apis cerana cerana	94128	215670033	126	WJBF01	WGS	INV	2020-03-10T00:00:00Z
Apis cerana japonica	292787	211200590	3315	BDUG01	WGS	INV	2017-07-08T00:00:00Z
Apis dorsata	7462	223527749	14287	WJNQ01	WGS	INV	2019-12-23T00:00:00Z
Apis dorsata	7462	219173384	45204	AUPE01	WGS	INV	2014-08-08T00:00:00Z
Apis florea	7463	212793145	18378	AEKZ01	WGS	INV	2019-11-21T00:00:00Z
Apis laboriosa	183418	226063288	4376	JACEOM01	WGS	INV	2020-08-05T00:00:00Z
Apis mellifera	7460	223937398	228	QIUM02	WGS	INV	2019-09-11T00:00:00Z
Apis mellifera	7460	229107307	16501	AADG06	WGS	INV	2014-08-04T00:00:00Z
Apis mellifera	7460	80253505	53516	GAZV01	TSA	INV	2020-06-03T00:00:00Z
Apis mellifera carnica	88217	149740294	52177	GALO01	TSA	INV	2015-07-28T00:00:00Z
Apis mellifera carnica	88217	226044179	169	JACDQX01	WGS	INV	2021-08-31T00:00:00Z
Apis mellifera caucasica	200407	224766697	224	JACDQY01	WGS	INV	2021-06-09T00:00:00Z
Apis mellifera intermissa	346610	243566977	522763	JSUV01	WGS	INV	2015-12-02T00:00:00Z
Apis mellifera ligustica	7469	231148580	42	JAHGQF01	WGS	INV	2021-07-22T00:00:00Z
Apis mellifera mellifera	44477	227084107	200	QFDB02	WGS	INV	2022-04-12T00:00:00Z
Apistogramma diplotaenia	2591248	627074439	48219	VOQJ01	WGS	VRT	2020-10-28T00:00:00Z
Apium graveolens	4045	3332577507	4852	WRXP01	WGS	PLN	2020-01-28T00:00:00Z
Apium graveolens Rapaceum Group	278110	3332579003	4863	CACVNY01	WGS	PLN	2020-03-17T00:00:00Z
Aplectana chamaeleonis	2696335	1036793689	2087	JAPDNZ01	WGS	INV	2022-12-27T00:00:00Z
Aplectana chamaeleonis	2696335	1036793689	2087	JAPDOI01	WGS	INV	2023-03-13T00:00:00Z
Aplidium turbinatum	2771288	73720	8	CAKKNH01	WGS	INV	2021-11-12T00:00:00Z
Aplidium turbinatum	2771288	488600651	2370	CAKKNX01	WGS	INV	2021-11-16T00:00:00Z
Aplocera efformata	934917	250785568	303	CAKLCO01	WGS	INV	2021-12-05T00:00:00Z
Aplocera efformata	934917	1449921	19	CAKLCP01	WGS	INV	2021-12-05T00:00:00Z
Aplochiton taeniatus	946358	461946147	41	JAGFOV01	WGS	VRT	2021-03-30T00:00:00Z
Aplochiton taeniatus	946358	560414924	5690	JAGFOW01	WGS	VRT	2021-03-30T00:00:00Z
Aplodontia rufa	51342	3005535537	1279526	PVKS01	WGS	ROD	2019-01-16T00:00:00Z
Aplysia californica	6500	737783370	164544	AASC03	WGS	INV	2014-08-06T00:00:00Z
Aplysia californica	6500	124437778	68308	GJYY01	TSA	INV	2022-06-10T00:00:00Z
Aplysia californica	6500	30253196	55769	GAZL01	TSA	INV	2014-03-13T00:00:00Z
Aplysia californica	6500	60422963	93860	GBAQ01	TSA	INV	2014-03-27T00:00:00Z
Aplysia californica	6500	115032909	150261	GBAV01	TSA	INV	2014-03-29T00:00:00Z
Aplysia californica	6500	108391569	123324	GBBE01	TSA	INV	2014-04-01T00:00:00Z
Aplysia californica	6500	106953572	127253	GBBG01	TSA	INV	2014-04-01T00:00:00Z
Aplysia californica	6500	111170173	136101	GBBV01	TSA	INV	2014-04-04T00:00:00Z
Aplysia californica	6500	81614190	105421	GBBW01	TSA	INV	2014-04-04T00:00:00Z
Aplysia californica	6500	142919778	181428	GBCZ01	TSA	INV	2014-04-18T00:00:00Z
Aplysia californica	6500	134670333	157989	GBDA01	TSA	INV	2014-04-18T00:00:00Z
Aplysina aerophoba	289389	419638	219	OIVB01	WGS	INV	2018-02-14T00:00:00Z
Aplysina aerophoba	289389	119538	70	OIVD01	WGS	INV	2018-02-14T00:00:00Z
Aplysina aerophoba	289389	3033594	261	OIVE01	WGS	INV	2018-02-14T00:00:00Z
Aplysina aerophoba	289389	1992632	803	OIVF01	WGS	INV	2018-02-14T00:00:00Z
Aplysina aerophoba	289389	218729	126	OIVG01	WGS	INV	2018-02-14T00:00:00Z
Aplysina aerophoba	289389	5122008	136	CATKZD01	WGS	INV	2023-04-28T00:00:00Z
Aplysina aerophoba	289389	158935688	1088	CATKZO01	WGS	INV	2023-04-28T00:00:00Z
Aplysina aerophoba	289389	283003369	618508	HANI01	TSA	INV	2020-02-15T00:00:00Z
Aplysina aerophoba	289389	562738118	1101660	HBWR01	TSA	INV	2022-02-01T00:00:00Z
Apocheima hispidaria	722657	170819	7	CANPUS01	WGS	INV	2022-12-16T00:00:00Z
Apocheima hispidaria	722657	413871417	558	CANPUY01	WGS	INV	2022-12-16T00:00:00Z
Apocrypta bakeri	490712	198585306	279	JACCIA01	WGS	INV	2021-06-16T00:00:00Z
Apocyclops royi	298420	257507543	143521	UYDY01	WGS	INV	2018-11-22T00:00:00Z
Apocyclops royi	298420	100678252	75477	GHAJ01	TSA	INV	2018-11-13T00:00:00Z
Apocynum venetum	377125	271208281	875	SRSM01	WGS	PLN	2021-08-13T00:00:00Z
Apoda limacodes	287200	619830845	3503	CAMJVJ01	WGS	INV	2022-09-02T00:00:00Z
Apoda limacodes	287200	371717	5	CAMJKE01	WGS	INV	2022-09-02T00:00:00Z
Apodemia ares	2613972	448590992	928020	DVYD01	WGS	INV	2022-02-17T00:00:00Z
Apodemia arnacis	2613974	342260867	901744	DWSS01	WGS	INV	2022-02-17T00:00:00Z
Apodemia chisosensis	2086727	610654764	629132	DVYC01	WGS	INV	2022-02-17T00:00:00Z
Apodemia duryi	2086723	647831575	748217	DWCB01	WGS	INV	2022-02-17T00:00:00Z
Apodemia hepburni	2086729	433309619	651233	DWDH01	WGS	INV	2022-02-18T00:00:00Z
Apodemia hypoglauca	2086732	215119115	613549	DWAD01	WGS	INV	2022-02-17T00:00:00Z
Apodemia mejicanus	1729663	198573404	604822	DVYH01	WGS	INV	2022-02-17T00:00:00Z
Apodemia mormo	42267	225764043	637566	DWSR01	WGS	INV	2022-02-17T00:00:00Z
Apodemia multiplaga	2086725	21721651	66879	DWCC01	WGS	INV	2022-02-17T00:00:00Z
Apodemia murphyi	2086735	334439465	787522	DWQP01	WGS	INV	2022-02-17T00:00:00Z
Apodemia nais	2086728	95247254	305993	DVYB01	WGS	INV	2022-02-17T00:00:00Z
Apodemia palmerii	2086736	339393689	789481	DWDF01	WGS	INV	2022-02-18T00:00:00Z
Apodemia virgulti	1729666	145403289	433873	DVYA01	WGS	INV	2022-02-17T00:00:00Z
Apodemia walkeri	2086741	394856033	500614	DWCD01	WGS	INV	2022-02-17T00:00:00Z
Apodemia zela	2613973	519512868	317053	DWBA01	WGS	INV	2022-02-17T00:00:00Z
Apodemus speciosus	105296	3494287372	336124	BDUI01	WGS	ROD	2017-08-01T00:00:00Z
Apodemus sylvaticus	10129	3758143898	559629	LIPJ01	WGS	ROD	2015-10-02T00:00:00Z
Apodemus sylvaticus	10129	2392986241	10861	CAMXCF01	WGS	ROD	2022-11-01T00:00:00Z
Apodemus sylvaticus	10129	142143810	472	CAMXCG01	WGS	ROD	2022-10-27T00:00:00Z
Apoderus coryli	201766	392668169	554	CAJVRO01	WGS	INV	2021-07-28T00:00:00Z
Apoderus coryli	201766	5649329	108	CAJVRQ02	WGS	INV	2022-10-12T00:00:00Z
Apogonichthyoides opercularis	2943258	1180038282	344688	JAPTGW01	WGS	VRT	2023-04-18T00:00:00Z
Apolygus lucorum	248454	1023618409	191	WIXP02	WGS	INV	2021-11-05T00:00:00Z
Apomyelois bistriatella	1666458	347797802	343	CAMRHB01	WGS	INV	2022-10-07T00:00:00Z
Aponogeton madagascariensis	251677	602664505	889694	GJFM02	TSA	PLN	2023-06-02T00:00:00Z
Aporia crataegi	129397	226628546	129	CAJVWA02	WGS	INV	2022-02-09T00:00:00Z
Aporophyla lueneburgensis	1337163	9270839	45	CAKOAL01	WGS	INV	2022-03-10T00:00:00Z
Aporophyla lueneburgensis	1337163	915863888	1843	CAKOAQ01	WGS	INV	2022-03-10T00:00:00Z
Aporophyla nigra	988065	726703739	758	CANHCH01	WGS	INV	2022-12-01T00:00:00Z
Aporophyla nigra	988065	2177540	31	CANNRW01	WGS	INV	2022-12-05T00:00:00Z
Aporrectodea caliginosa	302032	129786041	64553	GKBY01	TSA	INV	2022-10-18T00:00:00Z
Aporrectodea caliginosa	302032	1111828997	6452	JACEVL01	WGS	INV	2021-10-06T00:00:00Z
Apostasia ramifera	1920719	346615030	17082	JAEMOT01	WGS	PLN	2021-07-21T00:00:00Z
Apostasia shenzhenica	1088818	322899837	12380	PEFY01	WGS	PLN	2017-12-06T00:00:00Z
Aposthonia japonica	911381	38130302	54458	GAWU02	TSA	INV	2018-11-30T00:00:00Z
Apostichopus californicus	2032702	19920325	30606	GAVO01	TSA	INV	2014-05-22T00:00:00Z
Apostichopus californicus	2032702	786374980	308084	JAIPMN01	WGS	INV	2021-10-28T00:00:00Z
Apostichopus japonicus	307972	664370087	132607	MODV01	WGS	INV	2016-11-04T00:00:00Z
Apostichopus japonicus	307972	804620767	3278	MRZV01	WGS	INV	2017-11-06T00:00:00Z
Apostichopus japonicus	307972	46057018	59107	GFXQ02	TSA	INV	2021-04-16T00:00:00Z
Apostichopus japonicus	307972	117092898	99027	GHCH01	TSA	INV	2018-12-18T00:00:00Z
Apostichopus japonicus	307972	481946001	553507	GHDI01	TSA	INV	2020-01-08T00:00:00Z
Apostichopus japonicus	307972	98863699	101841	HADD01	TSA	INV	2017-09-29T00:00:00Z
Apostichopus japonicus	307972	93981462	102995	HADE01	TSA	INV	2017-09-29T00:00:00Z
Apostichopus japonicus	307972	90886316	98871	HADF01	TSA	INV	2017-09-29T00:00:00Z
Apostichopus japonicus	307972	275631299	254925	GFKU01	TSA	INV	2017-03-21T00:00:00Z
Apostichopus japonicus	307972	586345563	619706	GFLK01	TSA	INV	2017-04-12T00:00:00Z
Apostichopus japonicus	307972	78717693	85059	GAVS01	TSA	INV	2014-05-23T00:00:00Z
Apostichopus leukothele	2497127	500183690	320896	JAAAKB02	WGS	INV	2022-09-26T00:00:00Z
Apostichopus parvimensis	1902835	760654621	150862	JXUT01	WGS	INV	2015-02-27T00:00:00Z
Apostictopterus fuliginosus	2485974	99062540	271100	DWRJ01	WGS	INV	2022-02-17T00:00:00Z
Apotomis betuletana	1100915	2516083	32	CAKNZM01	WGS	INV	2022-03-03T00:00:00Z
Apotomis betuletana	1100915	682305395	856	CAKNZX01	WGS	INV	2022-03-03T00:00:00Z
Apotomis capreana	989741	1548978	39	CANQKS01	WGS	INV	2022-12-19T00:00:00Z
Apotomis capreana	989741	724988591	1607	CANQLU01	WGS	INV	2022-12-19T00:00:00Z
Apotomis turbidana	1100916	675155251	1442	CAJHUU01	WGS	INV	2021-01-25T00:00:00Z
Apotomis turbidana	1100916	2409098	15	CAJHVK02	WGS	INV	2022-01-30T00:00:00Z
Apricia jovialis	2337733	71755308	44446	IATN01	TSA	INV	2022-11-17T00:00:00Z
Aproaerema taeniolella	2566309	25239037	352	CATLJT01	WGS	INV	2023-04-28T00:00:00Z
Aproaerema taeniolella	2566309	577321780	5651	CATLKM01	WGS	INV	2023-04-28T00:00:00Z
Aproceros leucopoda	1385220	29840536	20024	GBTP01	TSA	INV	2017-03-24T00:00:00Z
Apseudes sp. R08	2823065	66270978	35738	GJCG01	TSA	INV	2021-11-29T00:00:00Z
Apseudomorpha sp. R05	2823066	31991083	33420	GJCD01	TSA	INV	2021-11-29T00:00:00Z
Aptenodytes forsteri	9233	1182540656	83173	JMFQ01	WGS	VRT	2016-11-17T00:00:00Z
Aptenodytes patagonicus	9234	1252291219	15968	VULM01	WGS	VRT	2020-01-31T00:00:00Z
Apteronemobius asahinai	746126	1676217857	151060	BPSV01	WGS	INV	2021-08-24T00:00:00Z
Apteronemobius asahinai	746126	87946394	114706	IACC01	TSA	INV	2020-10-24T00:00:00Z
Apteronotus albifrons	36673	184430539	109005	GGHI01	TSA	VRT	2018-03-07T00:00:00Z
Apteronotus albifrons	36673	129851599	45348	GFID01	TSA	VRT	2017-03-14T00:00:00Z
Apteronotus leptorhynchus	36674	338643037	369710	GGHJ01	TSA	VRT	2018-03-07T00:00:00Z
Apteronotus leptorhynchus	36674	1972267756	1233299	GBKR01	TSA	VRT	2015-04-28T00:00:00Z
Apteroperla tikumana	609060	27168083	27540	GDBZ01	TSA	INV	2019-01-15T00:00:00Z
Apteryx haastii	8823	1221441152	4183	PTFD01	WGS	VRT	2019-04-09T00:00:00Z
Apteryx owenii	8824	1231276503	5096	PTFC01	WGS	VRT	2019-04-09T00:00:00Z
Apteryx rowi	308060	1228902913	4120	PTFB01	WGS	VRT	2019-04-09T00:00:00Z
Aptinothrips rufus	1291243	339926289	301714	CABIKL01	WGS	INV	2019-08-01T00:00:00Z
Apus apus	8895	1100361224	109	JAJGQY01	WGS	VRT	2021-11-04T00:00:00Z
Apus apus	8895	1019504970	1697	JAJGQZ01	WGS	VRT	2021-11-03T00:00:00Z
Apyrrothrix (Melanopyge) sp. n. Burns01	2586027	392162184	238423	DVPD01	WGS	INV	2022-02-17T00:00:00Z
Apyrrothrix aesculapus	2585844	391107274	204641	DWEH01	WGS	INV	2022-02-17T00:00:00Z
Apyrrothrix araxes araxes	2585845	318697191	405085	DVPA01	WGS	INV	2022-02-17T00:00:00Z
Apyrrothrix arizonae	2585846	201607569	519412	DVPH01	WGS	INV	2022-02-17T00:00:00Z
Apyrrothrix chalybea chloris	2585848	265229157	579835	DWQS01	WGS	INV	2022-02-17T00:00:00Z
Apyrrothrix hoffmanni	2585849	26830397	88393	DVPC01	WGS	INV	2022-02-17T00:00:00Z
Apyrrothrix hygieia	2585850	399833293	218088	DWEG01	WGS	INV	2022-02-17T00:00:00Z
Apyrrothrix maculosa	2585851	426657145	330438	DVOY01	WGS	INV	2022-02-17T00:00:00Z
Apyrrothrix mulleri	2585852	39225255	78183	DVPB01	WGS	INV	2022-02-17T00:00:00Z
Apyrrothrix sangaris	2585853	18098661	62161	DVOZ01	WGS	INV	2022-02-17T00:00:00Z
Aquarius paludum	95691	40352458	71503	GDFO01	TSA	INV	2018-11-30T00:00:00Z
Aquila africana	321113	1348391903	143142	JANCMH01	WGS	VRT	2023-02-27T00:00:00Z
Aquila audax	8961	1206897819	17320	JANVCD01	WGS	VRT	2023-02-27T00:00:00Z
Aquila chrysaetos canadensis	216574	1171380234	173116	JDSB01	WGS	VRT	2014-05-30T00:00:00Z
Aquila chrysaetos canadensis	216574	1180019022	17031	JRUM01	WGS	VRT	2014-10-14T00:00:00Z
Aquila chrysaetos chrysaetos	223781	30390490	116	UFQG04	WGS	VRT	2021-03-25T00:00:00Z
Aquila chrysaetos chrysaetos	223781	792810001	3855	CABFWM02	WGS	VRT	2021-03-25T00:00:00Z
Aquila chrysaetos japonica	335091	1196037330	35366	BJEW01	WGS	VRT	2020-04-03T00:00:00Z
Aquila chrysaetos japonica	335091	1188176676	156	BSWC01	WGS	VRT	2023-04-07T00:00:00Z
Aquila nipalensis	193005	1248418760	73187	JANCNU01	WGS	VRT	2023-02-27T00:00:00Z
Aquila spilogaster	1848762	1799223129	8264	JANHGO01	WGS	VRT	2023-02-27T00:00:00Z
Aquilaria agallochum	1472648	689347386	110477	JMHV01	WGS	PLN	2014-05-30T00:00:00Z
Aquilaria malaccensis	223753	128239802	140168	GGSI01	TSA	PLN	2018-07-30T00:00:00Z
Aquilaria malaccensis	223753	123308111	127993	GHJS01	TSA	PLN	2019-05-03T00:00:00Z
Aquilaria sinensis	210372	699794123	3368	SMDT01	WGS	PLN	2019-05-15T00:00:00Z
Aquilaria sinensis	210372	783886958	14276	VZPZ01	WGS	PLN	2020-03-06T00:00:00Z
Aquilegia coerulea	218851	293079703	7189	NXFA01	WGS	PLN	2017-11-01T00:00:00Z
Aquilegia eximia	1291435	367332980	463	JALIGU01	WGS	PLN	2022-04-19T00:00:00Z
Aquilegia eximia	1291435	365822783	249	JALIGV01	WGS	PLN	2022-04-19T00:00:00Z
Aquilegia kansuensis	1291450	293205786	651	JAJHQE01	WGS	PLN	2021-11-16T00:00:00Z
Ara ambiguus	467031	1122134778	155467	JANCME01	WGS	VRT	2022-11-22T00:00:00Z
Ara ararauna	9226	1224360198	246	JAQZCJ01	WGS	VRT	2023-02-24T00:00:00Z
Ara ararauna	9226	1302242811	274	JAQZCK01	WGS	VRT	2023-02-24T00:00:00Z
Ara ararauna	9226	1172829865	309947	JANCMI01	WGS	VRT	2022-11-22T00:00:00Z
Ara ararauna	9226	1128178780	70001	JAAAKF01	WGS	VRT	2021-06-01T00:00:00Z
Ara chloropterus	176013	1164831351	189855	WSYR02	WGS	VRT	2022-11-27T00:00:00Z
Ara glaucogularis	303304	1144262409	378	CAKLIM01	WGS	VRT	2021-12-15T00:00:00Z
Ara glaucogularis	303304	1157392775	182696	JAAAKJ02	WGS	VRT	2022-11-30T00:00:00Z
Ara glaucogularis	303304	1139702960	56	JACACR01	WGS	VRT	2020-07-21T00:00:00Z
Ara macao	176014	1219003621	233001	JANEYE01	WGS	VRT	2022-11-22T00:00:00Z
Ara macao	176014	997636189	504229	AOUJ01	WGS	VRT	2014-08-21T00:00:00Z
Ara macao	176014	1035921044	282947	AMXX01	WGS	VRT	2014-08-11T00:00:00Z
Ara militaris	57237	1163064974	164959	JAAAKA02	WGS	VRT	2023-01-30T00:00:00Z
Ara rubrogenys	467030	1204348606	301582	JANCMJ01	WGS	VRT	2022-11-22T00:00:00Z
Ara rubrogenys	467030	1161924866	221	CAKMNV02	WGS	VRT	2022-01-30T00:00:00Z
Ara severus	178883	1119346424	142594	JANRGX01	WGS	VRT	2023-01-30T00:00:00Z
Arabidopsis arenosa	38785	152957794	264	JAMZIG01	WGS	PLN	2022-11-14T00:00:00Z
Arabidopsis arenosa	38785	212810679	121101	CADHRU01	WGS	PLN	2020-04-21T00:00:00Z
Arabidopsis arenosa	38785	164833954	10147	CADWAH01	WGS	PLN	2020-05-06T00:00:00Z
Arabidopsis arenosa subsp. arenosa	395843	460959661	3629	CAJIMY01	WGS	PLN	2021-01-25T00:00:00Z
Arabidopsis halleri	81970	164573762	40344	RCNM01	WGS	PLN	2019-04-26T00:00:00Z
Arabidopsis halleri	81970	121323518	87895	GJCZ01	TSA	PLN	2021-04-12T00:00:00Z
Arabidopsis halleri subsp. gemmifera	63677	413881146	344622	BFAE01	WGS	PLN	2018-03-21T00:00:00Z
Arabidopsis halleri subsp. gemmifera	63677	221139660	282453	BASO01	WGS	PLN	2015-12-08T00:00:00Z
Arabidopsis halleri subsp. gemmifera	63677	196243198	2239	FJVB01	WGS	PLN	2016-09-29T00:00:00Z
Arabidopsis halleri subsp. halleri	81971	43761752	34818	GFUL01	TSA	PLN	2019-01-16T00:00:00Z
Arabidopsis halleri subsp. halleri	81971	173971327	3249	JAAEDN01	WGS	PLN	2020-02-27T00:00:00Z
Arabidopsis lyrata	59689	243772934	783	CALYLY01	WGS	PLN	2022-07-21T00:00:00Z
Arabidopsis lyrata subsp. lyrata	81972	183707801	3645	ADBK01	WGS	PLN	2014-08-11T00:00:00Z
Arabidopsis lyrata subsp. petraea	59691	187501846	54	JAMZIF01	WGS	PLN	2022-11-14T00:00:00Z
Arabidopsis lyrata subsp. petraea	59691	175182717	1675	OANL01	WGS	PLN	2018-08-06T00:00:00Z
Arabidopsis lyrata subsp. petraea	59691	202972003	281536	BASP01	WGS	PLN	2015-12-08T00:00:00Z
Arabidopsis suecica	45249	262563758	13	CAJIMT01	WGS	PLN	2021-01-25T00:00:00Z
Arabidopsis suecica	45249	272254484	269	JAEFBJ01	WGS	PLN	2021-07-13T00:00:00Z
Arabidopsis thaliana	3702	118890721	30	LUHQ01	WGS	PLN	2017-03-06T00:00:00Z
Arabidopsis thaliana	3702	115629387	6358	LXSY01	WGS	PLN	2016-10-14T00:00:00Z
Arabidopsis thaliana	3702	127419454	378	JSAD01	WGS	PLN	2014-11-10T00:00:00Z
Arabidopsis thaliana	3702	244583374	411	MJMM01	WGS	PLN	2016-11-15T00:00:00Z
Arabidopsis thaliana	3702	119744458	36	JAMBAT01	WGS	PLN	2022-09-25T00:00:00Z
Arabidopsis thaliana	3702	119166865	59	OFAM01	WGS	PLN	2018-03-19T00:00:00Z
Arabidopsis thaliana	3702	119127857	139	OFAN01	WGS	PLN	2018-03-19T00:00:00Z
Arabidopsis thaliana	3702	119203081	40	OFEF01	WGS	PLN	2018-03-18T00:00:00Z
Arabidopsis thaliana	3702	1688211	157	OCVY01	WGS	PLN	2019-06-17T00:00:00Z
Arabidopsis thaliana	3702	1537618	126	OCVZ01	WGS	PLN	2019-06-17T00:00:00Z
Arabidopsis thaliana	3702	1729968	149	OCWA01	WGS	PLN	2019-06-17T00:00:00Z
Arabidopsis thaliana	3702	1659375	159	OCWB01	WGS	PLN	2019-06-17T00:00:00Z
Arabidopsis thaliana	3702	1845530	154	OCWC01	WGS	PLN	2019-06-17T00:00:00Z
Arabidopsis thaliana	3702	1263941	151	OCWD01	WGS	PLN	2019-06-17T00:00:00Z
Arabidopsis thaliana	3702	1826754	191	OCWE01	WGS	PLN	2019-06-17T00:00:00Z
Arabidopsis thaliana	3702	1151885	124	OCWF01	WGS	PLN	2019-06-17T00:00:00Z
Arabidopsis thaliana	3702	1340316	133	OCWG01	WGS	PLN	2019-06-17T00:00:00Z
Arabidopsis thaliana	3702	1461800	147	OCWH01	WGS	PLN	2019-06-17T00:00:00Z
Arabidopsis thaliana	3702	2035038	248	OCWI01	WGS	PLN	2019-06-17T00:00:00Z
Arabidopsis thaliana	3702	1864008	172	OCWJ01	WGS	PLN	2019-06-17T00:00:00Z
Arabidopsis thaliana	3702	1033965	120	OCWK01	WGS	PLN	2019-06-17T00:00:00Z
Arabidopsis thaliana	3702	1372177	132	OCWL01	WGS	PLN	2019-06-17T00:00:00Z
Arabidopsis thaliana	3702	1150002	133	OCWM01	WGS	PLN	2019-06-17T00:00:00Z
Arabidopsis thaliana	3702	1337577	133	OCWN01	WGS	PLN	2019-06-17T00:00:00Z
Arabidopsis thaliana	3702	1719341	188	OCWO01	WGS	PLN	2019-06-17T00:00:00Z
Arabidopsis thaliana	3702	1729859	182	OCWP01	WGS	PLN	2019-06-17T00:00:00Z
Arabidopsis thaliana	3702	2270915	190	OCWQ01	WGS	PLN	2019-06-17T00:00:00Z
Arabidopsis thaliana	3702	1949197	183	OCWR01	WGS	PLN	2019-06-17T00:00:00Z
Arabidopsis thaliana	3702	1527200	146	OCWS01	WGS	PLN	2019-06-17T00:00:00Z
Arabidopsis thaliana	3702	1381440	140	OCWT01	WGS	PLN	2019-06-17T00:00:00Z
Arabidopsis thaliana	3702	838703	109	OCWU01	WGS	PLN	2019-06-17T00:00:00Z
Arabidopsis thaliana	3702	2684286	231	OCWV01	WGS	PLN	2019-06-17T00:00:00Z
Arabidopsis thaliana	3702	1319568	158	OCWX01	WGS	PLN	2019-06-17T00:00:00Z
Arabidopsis thaliana	3702	1972771	169	OCWY01	WGS	PLN	2019-06-17T00:00:00Z
Arabidopsis thaliana	3702	1871921	156	OCWZ01	WGS	PLN	2019-06-17T00:00:00Z
Arabidopsis thaliana	3702	1140835	138	OCXA01	WGS	PLN	2019-06-17T00:00:00Z
Arabidopsis thaliana	3702	1362566	136	OCXB01	WGS	PLN	2019-06-17T00:00:00Z
Arabidopsis thaliana	3702	1616035	153	OCXC01	WGS	PLN	2019-06-17T00:00:00Z
Arabidopsis thaliana	3702	1781611	170	OCXD01	WGS	PLN	2019-06-17T00:00:00Z
Arabidopsis thaliana	3702	1657918	153	OCXE01	WGS	PLN	2019-06-17T00:00:00Z
Arabidopsis thaliana	3702	1801188	169	OCXF01	WGS	PLN	2019-06-17T00:00:00Z
Arabidopsis thaliana	3702	1629008	158	OCXG01	WGS	PLN	2019-06-17T00:00:00Z
Arabidopsis thaliana	3702	1568636	151	OCXH01	WGS	PLN	2019-06-17T00:00:00Z
Arabidopsis thaliana	3702	2180754	205	OCXI01	WGS	PLN	2019-06-17T00:00:00Z
Arabidopsis thaliana	3702	1335294	137	OCXJ01	WGS	PLN	2019-06-17T00:00:00Z
Arabidopsis thaliana	3702	1414100	116	OCXK01	WGS	PLN	2019-06-17T00:00:00Z
Arabidopsis thaliana	3702	1756136	156	OCXL01	WGS	PLN	2019-06-17T00:00:00Z
Arabidopsis thaliana	3702	2053569	194	OCXM01	WGS	PLN	2019-06-17T00:00:00Z
Arabidopsis thaliana	3702	1864802	164	OCXN01	WGS	PLN	2019-06-17T00:00:00Z
Arabidopsis thaliana	3702	2026447	164	OCXO01	WGS	PLN	2019-06-17T00:00:00Z
Arabidopsis thaliana	3702	844674	119	OCXP01	WGS	PLN	2019-06-17T00:00:00Z
Arabidopsis thaliana	3702	2272777	199	OCXQ01	WGS	PLN	2019-06-17T00:00:00Z
Arabidopsis thaliana	3702	1799704	173	OCXR01	WGS	PLN	2019-06-17T00:00:00Z
Arabidopsis thaliana	3702	1733152	143	OCXS01	WGS	PLN	2019-06-17T00:00:00Z
Arabidopsis thaliana	3702	1110185	124	OCXT01	WGS	PLN	2019-06-17T00:00:00Z
Arabidopsis thaliana	3702	1769987	156	OCXU01	WGS	PLN	2019-06-17T00:00:00Z
Arabidopsis thaliana	3702	1763175	182	OCXV01	WGS	PLN	2019-06-17T00:00:00Z
Arabidopsis thaliana	3702	1835747	156	OCXW01	WGS	PLN	2019-06-17T00:00:00Z
Arabidopsis thaliana	3702	1931388	180	OCXX01	WGS	PLN	2019-06-17T00:00:00Z
Arabidopsis thaliana	3702	1901149	200	OCXY01	WGS	PLN	2019-06-17T00:00:00Z
Arabidopsis thaliana	3702	847842	146	OCXZ01	WGS	PLN	2019-06-17T00:00:00Z
Arabidopsis thaliana	3702	2154617	194	OCYA01	WGS	PLN	2019-06-17T00:00:00Z
Arabidopsis thaliana	3702	2042233	169	OCYB01	WGS	PLN	2019-06-17T00:00:00Z
Arabidopsis thaliana	3702	1867839	173	OCYC01	WGS	PLN	2019-06-17T00:00:00Z
Arabidopsis thaliana	3702	1609635	141	OCYD01	WGS	PLN	2019-06-17T00:00:00Z
Arabidopsis thaliana	3702	2013614	163	OCYE01	WGS	PLN	2019-06-17T00:00:00Z
Arabidopsis thaliana	3702	1889459	171	OCYF01	WGS	PLN	2019-06-17T00:00:00Z
Arabidopsis thaliana	3702	1931355	176	OCYG01	WGS	PLN	2019-06-17T00:00:00Z
Arabidopsis thaliana	3702	1719711	133	OCYH01	WGS	PLN	2019-06-17T00:00:00Z
Arabidopsis thaliana	3702	325150	52	OCYI01	WGS	PLN	2019-06-17T00:00:00Z
Arabidopsis thaliana	3702	1958562	167	OCYJ01	WGS	PLN	2019-06-17T00:00:00Z
Arabidopsis thaliana	3702	1667168	179	OCYK01	WGS	PLN	2019-06-17T00:00:00Z
Arabidopsis thaliana	3702	1834012	182	OCYL01	WGS	PLN	2019-06-17T00:00:00Z
Arabidopsis thaliana	3702	1931823	173	OCYM01	WGS	PLN	2019-06-17T00:00:00Z
Arabidopsis thaliana	3702	2137568	189	OCYN01	WGS	PLN	2019-06-17T00:00:00Z
Arabidopsis thaliana	3702	1550255	153	OCYO01	WGS	PLN	2019-06-17T00:00:00Z
Arabidopsis thaliana	3702	1603123	153	OCYP01	WGS	PLN	2019-06-17T00:00:00Z
Arabidopsis thaliana	3702	195283	19	OCZF01	WGS	PLN	2019-06-17T00:00:00Z
Arabidopsis thaliana	3702	119750280	78	OMOK01	WGS	PLN	2018-03-09T00:00:00Z
Arabidopsis thaliana	3702	119502799	62	OMOL01	WGS	PLN	2018-03-09T00:00:00Z
Arabidopsis thaliana	3702	117093675	101	CAJTBL01	WGS	PLN	2022-04-30T00:00:00Z
Arabidopsis thaliana	3702	117099189	79	CAJTBN01	WGS	PLN	2022-04-30T00:00:00Z
Arabidopsis thaliana	3702	1432497	3362	DAHAIV01	TSA	PLN	2022-08-31T00:00:00Z
Arabidopsis thaliana	3702	124088133	35	CAJHIL01	WGS	PLN	2021-03-11T00:00:00Z
Arabidopsis thaliana	3702	120615104	86	CAEFZF01	WGS	PLN	2020-05-15T00:00:00Z
Arabidopsis thaliana	3702	1757117	106	CABPTH03	WGS	PLN	2019-09-06T00:00:00Z
Arabidopsis thaliana	3702	1884485	89	CABPTI01	WGS	PLN	2019-08-27T00:00:00Z
Arabidopsis thaliana	3702	3370695	179	CABPTJ01	WGS	PLN	2019-08-27T00:00:00Z
Arabidopsis thaliana	3702	1445234	97	CABPTK01	WGS	PLN	2019-08-27T00:00:00Z
Arabidopsis thaliana	3702	3107588	137	CABPTL01	WGS	PLN	2019-08-27T00:00:00Z
Arabidopsis thaliana	3702	1813724	100	CABPTM01	WGS	PLN	2019-08-27T00:00:00Z
Arabidopsis thaliana	3702	120129838	111	CACRSJ01	WGS	PLN	2019-11-12T00:00:00Z
Arabidopsis thaliana	3702	119225180	98	CACSHJ01	WGS	PLN	2019-12-12T00:00:00Z
Arabidopsis thaliana	3702	1569215	104	CAACVU01	WGS	PLN	2019-02-11T00:00:00Z
Arabidopsis thaliana	3702	840519	18	CAKOEQ01	WGS	PLN	2022-03-21T00:00:00Z
Arabidopsis thaliana	3702	1554472	18	CAKOER01	WGS	PLN	2022-03-21T00:00:00Z
Arabidopsis thaliana	3702	129408692	54	CAKMHS01	WGS	PLN	2022-01-21T00:00:00Z
Arabidopsis thaliana	3702	90945308	23503	AFMZ01	WGS	PLN	2014-08-11T00:00:00Z
Arabidopsis thaliana	3702	90266344	24565	AFNA01	WGS	PLN	2014-08-11T00:00:00Z
Arabidopsis thaliana	3702	91882512	22374	AFNB01	WGS	PLN	2014-08-11T00:00:00Z
Arabidopsis thaliana	3702	90678978	27859	AFNC01	WGS	PLN	2014-08-11T00:00:00Z
Arabidopsis thaliana	3702	74536800	63997	GGJX01	TSA	PLN	2018-08-08T00:00:00Z
Arabidopsis thaliana	3702	5236939	15263	GJRK01	TSA	PLN	2022-02-16T00:00:00Z
Arabidopsis thaliana	3702	288128660	163592	GKIF01	TSA	PLN	2023-02-13T00:00:00Z
Arabidopsis thaliana x Arabidopsis arenosa	1240361	268996375	218	JAEFBK01	WGS	PLN	2021-07-13T00:00:00Z
Arabidopsis thaliana x Arabidopsis arenosa	1240361	274541035	413	JAESVC01	WGS	PLN	2021-07-13T00:00:00Z
Arabis alpina	50452	281141022	83773	JNGA01	WGS	PLN	2014-08-12T00:00:00Z
Arabis alpina	50452	268460356	87633	VAUT01	WGS	PLN	2020-09-15T00:00:00Z
Arabis alpina	50452	171788040	37680	CBTM01	WGS	PLN	2015-01-30T00:00:00Z
Arabis montbretiana	746018	257692425	2540	LNCH02	WGS	PLN	2021-10-04T00:00:00Z
Arabis nemorensis	586526	192127358	8	CABITT03	WGS	PLN	2019-08-06T00:00:00Z
Arabis nordmanniana	571359	342306570	267228	LNCG01	WGS	PLN	2016-01-04T00:00:00Z
Arabis verna	571374	20685471	19839	HACS01	TSA	PLN	2017-09-29T00:00:00Z
Arachis cardenasii	51121	1238080321	750	JADQCP01	WGS	PLN	2021-06-03T00:00:00Z
Arachis duranensis	130453	1075955319	20214	MAMN01	WGS	PLN	2016-07-18T00:00:00Z
Arachis duranensis	130453	1081734404	1588	JQIN02	WGS	PLN	2020-09-21T00:00:00Z
Arachis duranensis	130453	1106325876	116	JAAOXE01	WGS	PLN	2020-10-02T00:00:00Z
Arachis duranensis	130453	24355435	30807	GBIP01	TSA	PLN	2015-02-02T00:00:00Z
Arachis duranensis	130453	26958481	39276	GBIR01	TSA	PLN	2015-02-02T00:00:00Z
Arachis duranensis	130453	34674541	37379	GBIU01	TSA	PLN	2015-02-02T00:00:00Z
Arachis duranensis	130453	32616337	32805	GBIV01	TSA	PLN	2015-02-02T00:00:00Z
Arachis duranensis	130453	30443387	33145	GBJF01	TSA	PLN	2015-02-02T00:00:00Z
Arachis duranensis	130453	62002319	70200	GBJK01	TSA	PLN	2015-02-02T00:00:00Z
Arachis duranensis	130453	1099859369	185	JADKZC01	WGS	PLN	2021-06-03T00:00:00Z
Arachis duranensis	130453	1067483440	1087	JAGSFY01	WGS	PLN	2022-11-09T00:00:00Z
Arachis glabrata	212810	98130831	90547	GJAB01	TSA	PLN	2021-11-09T00:00:00Z
Arachis hypogaea	3818	2551684895	29	SDMP01	WGS	PLN	2019-02-12T00:00:00Z
Arachis hypogaea	3818	2556916893	384	PIVG01	WGS	PLN	2018-05-30T00:00:00Z
Arachis hypogaea	3818	81189399	70215	GGBX01	TSA	PLN	2022-08-30T00:00:00Z
Arachis hypogaea	3818	172670587	128045	GJFR01	TSA	PLN	2023-03-20T00:00:00Z
Arachis hypogaea	3818	44455414	59189	GAER01	TSA	PLN	2013-07-08T00:00:00Z
Arachis hypogaea	3818	22819884	50090	GAIG01	TSA	PLN	2014-06-16T00:00:00Z
Arachis hypogaea	3818	743513	1379	GATE01	TSA	PLN	2014-03-26T00:00:00Z
Arachis hypogaea	3818	14948761	22131	GBHK01	TSA	PLN	2015-01-05T00:00:00Z
Arachis hypogaea	3818	1216971	4913	GDDN01	TSA	PLN	2015-10-29T00:00:00Z
Arachis hypogaea	3818	129918697	102303	GDKN01	TSA	PLN	2015-11-02T00:00:00Z
Arachis hypogaea	3818	32851897	47922	GEFP01	TSA	PLN	2016-03-30T00:00:00Z
Arachis hypogaea	3818	2490838411	223	JADWDE01	WGS	PLN	2020-12-17T00:00:00Z
Arachis hypogaea	3818	2580199504	285	JAIGYT01	WGS	PLN	2021-09-09T00:00:00Z
Arachis hypogaea	3818	46066744	1217	JAIGYU01	WGS	PLN	2021-09-09T00:00:00Z
Arachis hypogaea subsp. fastigiata	226206	2535293969	1569	JAKNSI01	WGS	PLN	2022-04-08T00:00:00Z
Arachis hypogaea subsp. hypogaea	226205	2555804451	426	JAGJTH01	WGS	PLN	2023-02-03T00:00:00Z
Arachis hypogaea var. vulgaris	925390	35225745	58960	GBIX01	TSA	PLN	2015-02-02T00:00:00Z
Arachis hypogaea var. vulgaris	925390	57312683	70752	GBIY01	TSA	PLN	2015-02-02T00:00:00Z
Arachis hypogaea var. vulgaris	925390	56600858	51407	GBIZ01	TSA	PLN	2015-02-02T00:00:00Z
Arachis hypogaea var. vulgaris	925390	74574575	66989	GBJE01	TSA	PLN	2015-02-02T00:00:00Z
Arachis hypogaea var. vulgaris	925390	30067853	45879	GBJH01	TSA	PLN	2015-02-02T00:00:00Z
Arachis hypogaea var. vulgaris	925390	214940405	244114	GBJI01	TSA	PLN	2015-02-02T00:00:00Z
Arachis ipaensis	130454	1349014219	997	JQIO01	WGS	PLN	2022-09-30T00:00:00Z
Arachis ipaensis	130454	22223312	29780	GBIQ01	TSA	PLN	2015-02-02T00:00:00Z
Arachis ipaensis	130454	24175988	37725	GBIS01	TSA	PLN	2015-02-02T00:00:00Z
Arachis ipaensis	130454	34674541	37379	GBIW01	TSA	PLN	2015-02-02T00:00:00Z
Arachis ipaensis	130454	22158542	29786	GBJG01	TSA	PLN	2015-02-02T00:00:00Z
Arachis ipaensis	130454	27910781	30764	GBJL01	TSA	PLN	2015-02-02T00:00:00Z
Arachis ipaensis	130454	52954773	64014	GBJP01	TSA	PLN	2015-02-02T00:00:00Z
Arachis ipaensis	130454	1349494404	495	JAGSFZ01	WGS	PLN	2022-11-09T00:00:00Z
Arachis monticola	227691	2618653824	6909	QBTX01	WGS	PLN	2018-04-27T00:00:00Z
Arachis stenosperma	217475	1328990366	30	JAAOXF01	WGS	PLN	2020-10-02T00:00:00Z
Arachis stenosperma	217475	29716940	35488	GDBK01	TSA	PLN	2015-11-30T00:00:00Z
Arachnocampa luminosa	270894	187243681	196675	GDQV01	TSA	INV	2015-12-02T00:00:00Z
Arachnura logio	1538133	45609458	36377	IBSH01	TSA	INV	2022-11-17T00:00:00Z
Arachnura melanura	1538134	47074552	38523	IAPN01	TSA	INV	2022-11-17T00:00:00Z
Arachnura sp. IDV 6722	2337289	76340001	45254	IBBJ01	TSA	INV	2022-11-17T00:00:00Z
Aradophagus sp. ZL-2020	2729017	246064364	70572	JABFOV01	WGS	INV	2022-04-05T00:00:00Z
Aradus betulae	1452765	36319390	55559	GDFD01	TSA	INV	2018-11-30T00:00:00Z
Aramus guarauna	54356	1170510309	18527	VXBL01	WGS	VRT	2020-07-10T00:00:00Z
Araneidae gen. sp. IDV 2105	2507275	45793323	39035	ICMY01	TSA	INV	2022-11-17T00:00:00Z
Araneidae gen. sp. IDV 2106	2507276	51416549	42586	ICMZ01	TSA	INV	2022-11-17T00:00:00Z
Araneidae gen. sp. IDV 2115	2507277	62816921	46583	ICNA01	TSA	INV	2022-11-17T00:00:00Z
Araneidae gen. sp. IDV 5018	2337812	83336545	48081	IAWF01	TSA	INV	2022-11-17T00:00:00Z
Araneidae gen. sp. IDV 5229	2337813	73738851	43769	IBQC01	TSA	INV	2022-11-17T00:00:00Z
Araneidae gen. sp. IDV 5554	2507278	56105488	40128	ICMF01	TSA	INV	2022-11-17T00:00:00Z
Araneidae gen. sp. IDV 6698	2337814	66680942	43628	IBFY01	TSA	INV	2022-11-17T00:00:00Z
Araneidae gen. sp. IDV 6821	2337815	76411089	44503	IBZL01	TSA	INV	2022-11-17T00:00:00Z
Araneidae gen. sp. IDV 6850	2337816	84099483	45059	IBGY01	TSA	INV	2022-11-17T00:00:00Z
Araneidae gen. sp. IDV 6857	2337817	82987981	44010	ICGX01	TSA	INV	2022-11-17T00:00:00Z
Araneidae gen. sp. IDV 6862	2337818	44214527	39201	ICKT01	TSA	INV	2022-11-17T00:00:00Z
Araneidae gen. sp. IDV 7356	2511321	69302704	46157	ICOX01	TSA	INV	2022-11-17T00:00:00Z
Araneidae gen. sp. IDV 7389	2511322	64341619	43982	ICOY01	TSA	INV	2022-11-17T00:00:00Z
Araneidae gen. sp. IDV 7390	2511323	64140811	46054	ICOZ01	TSA	INV	2022-11-17T00:00:00Z
Araneidae gen. sp. IDV 7392	2511324	67024564	44503	ICPA01	TSA	INV	2022-11-17T00:00:00Z
Araneus acusisetus	1112381	62580125	44579	IAIV01	TSA	INV	2022-11-17T00:00:00Z
Araneus acusisetus	1112381	46169730	38407	IAMO01	TSA	INV	2022-11-17T00:00:00Z
Araneus acusisetus	1112381	48661295	39463	IBEJ01	TSA	INV	2022-11-17T00:00:00Z
Araneus amabilis	2337290	55300635	40306	IBIL01	TSA	INV	2022-11-17T00:00:00Z
Araneus bicentenarius	29013	53501490	38408	IBXL01	TSA	INV	2022-11-17T00:00:00Z
Araneus diadematus	45920	54458436	41050	IAND01	TSA	INV	2022-11-17T00:00:00Z
Araneus diadematus	45920	37275242	35976	IAYN01	TSA	INV	2022-11-17T00:00:00Z
Araneus diadematus	45920	18383421	26375	GERP01	TSA	INV	2020-09-16T00:00:00Z
Araneus dimidiatus	1315038	58858069	40338	ICGT01	TSA	INV	2022-11-17T00:00:00Z
Araneus ejusmodi	1112383	54711669	39150	IAIE01	TSA	INV	2022-11-17T00:00:00Z
Araneus ejusmodi	1112383	49820342	38096	IAKC01	TSA	INV	2022-11-17T00:00:00Z
Araneus ejusmodi	1112383	51062418	37994	IAOV01	TSA	INV	2022-11-17T00:00:00Z
Araneus ejusmodi	1112383	50618015	38320	IBOI01	TSA	INV	2022-11-17T00:00:00Z
Araneus ejusmodi	1112383	59615742	40072	IBTF01	TSA	INV	2022-11-17T00:00:00Z
Araneus ejusmodi	1112383	54301402	38510	ICBB01	TSA	INV	2022-11-17T00:00:00Z
Araneus guttulatus	2204221	75841012	46444	IAOU01	TSA	INV	2022-11-17T00:00:00Z
Araneus hoshi	2337291	77158044	46401	IBWG01	TSA	INV	2022-11-17T00:00:00Z
Araneus inustus	673380	66630882	46259	IAHS01	TSA	INV	2022-11-17T00:00:00Z
Araneus ishisawai	1112384	58291521	40856	IAGE01	TSA	INV	2022-11-17T00:00:00Z
Araneus ishisawai	1112384	50485748	38501	IBQU01	TSA	INV	2022-11-17T00:00:00Z
Araneus ishisawai	1112384	59550613	40429	IBYH01	TSA	INV	2022-11-17T00:00:00Z
Araneus macacus	2337292	55384833	39766	IALC01	TSA	INV	2022-11-17T00:00:00Z
Araneus macacus	2337292	42767039	37066	ICFI01	TSA	INV	2022-11-17T00:00:00Z
Araneus marmoreus	336584	40293477	36208	IBZH01	TSA	INV	2022-11-17T00:00:00Z
Araneus ogatai	2337293	45205989	39319	IBEY01	TSA	INV	2022-11-17T00:00:00Z
Araneus pentagrammicus	2337294	69045978	46456	IBXD01	TSA	INV	2022-11-17T00:00:00Z
Araneus pentagrammicus	2337294	40251124	38456	IBZE01	TSA	INV	2022-11-17T00:00:00Z
Araneus pinguis	2337295	41263380	36265	IAHH01	TSA	INV	2022-11-17T00:00:00Z
Araneus pinguis	2337295	17060187	29046	IBOJ01	TSA	INV	2022-11-17T00:00:00Z
Araneus pinguis	2337295	68230962	42194	IBOV01	TSA	INV	2022-11-17T00:00:00Z
Araneus rotundicornis	2337296	51991964	39881	IASO01	TSA	INV	2022-11-17T00:00:00Z
Araneus seminiger	2175613	55139347	32220	IAFY01	TSA	INV	2022-11-17T00:00:00Z
Araneus sp. IDV 326	2337297	71722666	46011	IBNZ01	TSA	INV	2022-11-17T00:00:00Z
Araneus sp. IDV 5564	2507251	64021032	43192	ICMH01	TSA	INV	2022-11-17T00:00:00Z
Araneus sp. IDV 5567	2507252	68953749	44165	ICMI01	TSA	INV	2022-11-17T00:00:00Z
Araneus sp. IDV 5580	2507253	73779634	45406	ICMK01	TSA	INV	2022-11-17T00:00:00Z
Araneus sp. IDV 5595	2507254	56641558	40900	ICML01	TSA	INV	2022-11-17T00:00:00Z
Araneus sp. IDV 5602	2507255	66569169	43454	ICMM01	TSA	INV	2022-11-17T00:00:00Z
Araneus sp. IDV 6832	2507256	66400053	41675	ICNU01	TSA	INV	2022-11-17T00:00:00Z
Araneus stella	1112385	44169880	37211	IBQX01	TSA	INV	2022-11-17T00:00:00Z
Araneus tsurusakii	2337298	66946128	45880	ICFR01	TSA	INV	2022-11-17T00:00:00Z
Araneus tsurusakii	2337298	47678398	40285	ICGK01	TSA	INV	2022-11-17T00:00:00Z
Araneus uyemurai	1112386	47566248	37646	IAIN01	TSA	INV	2022-11-17T00:00:00Z
Araneus variegatus	1112387	44251590	38289	IBGT01	TSA	INV	2022-11-17T00:00:00Z
Araneus ventricosus	182803	3656621265	300721	BGPR01	WGS	INV	2022-11-17T00:00:00Z
Araneus viridiventris	2337299	55888323	43011	IBOR01	TSA	INV	2022-11-17T00:00:00Z
Araneus yasudai	2507257	80997651	48446	ICMV01	TSA	INV	2022-11-17T00:00:00Z
Araniella yaginumai	1112389	53959508	40954	IANN01	TSA	INV	2022-11-17T00:00:00Z
Araniella yaginumai	1112389	60562173	42431	IASU01	TSA	INV	2022-11-17T00:00:00Z
Araniella yaginumai	1112389	61208503	43443	IAYO01	TSA	INV	2022-11-17T00:00:00Z
Araniella yaginumai	1112389	50276711	40789	IBNT01	TSA	INV	2022-11-17T00:00:00Z
Araniella yaginumai	1112389	48596464	40334	IBRK01	TSA	INV	2022-11-17T00:00:00Z
Arapaima gigas	113544	667351951	60052	VFQV01	WGS	VRT	2019-08-08T00:00:00Z
Arapaima gigas	113544	661278939	5301	UFQX01	WGS	VRT	2018-07-24T00:00:00Z
Aratinga auricapillus	867384	1149823348	161266	JANEXI01	WGS	VRT	2022-11-22T00:00:00Z
Aratinga jandaya	231027	1152356529	240619	JANCMD01	WGS	VRT	2022-11-22T00:00:00Z
Aratinga maculata	1230190	1126680219	159392	JANCNV01	WGS	VRT	2023-01-30T00:00:00Z
Aratinga nenday	51908	1154811290	236423	JANCMF01	WGS	VRT	2022-11-22T00:00:00Z
Aratinga solstitialis	176015	1150546593	204719	WYDG02	WGS	VRT	2022-11-27T00:00:00Z
Aratinga solstitialis	176015	1169445099	1570	CABHOG01	WGS	VRT	2019-11-12T00:00:00Z
Aratinga weddellii	190661	1133248645	150055	WYDH02	WGS	VRT	2022-11-27T00:00:00Z
Araucaria cunninghamii	56994	41761802	70475	GCKF01	TSA	PLN	2015-03-18T00:00:00Z
Arbacia punctulata	7641	37152787	93487	GECD01	TSA	INV	2016-01-28T00:00:00Z
Arbutus unedo	84005	452681481	140035	JABCMJ01	WGS	PLN	2020-09-30T00:00:00Z
Archaeopsylla erinacei	48909	22429870	35270	GABB01	TSA	INV	2016-05-02T00:00:00Z
Archaeoteleia sp. ZL-2020	2729018	311217082	164104	JABFOW01	WGS	INV	2022-04-05T00:00:00Z
Archilochus colubris	190676	1100571516	572	JALBCY01	WGS	VRT	2022-04-22T00:00:00Z
Archimicrodon brachycerus	1572511	31623146	38438	GCFH01	TSA	INV	2018-04-05T00:00:00Z
Archips crataeganus	1857967	556708134	752	CANUEO01	WGS	INV	2023-01-08T00:00:00Z
Archips xylosteana	1100919	585435476	538	CANOAV01	WGS	INV	2022-12-12T00:00:00Z
Archips xylosteana	1100919	21748152	82	CANOAX01	WGS	INV	2022-12-12T00:00:00Z
Architeuthis dux	256136	2693618964	7373	VCCN01	WGS	INV	2020-01-16T00:00:00Z
Archivesica marissinica	2291877	37385531	25522	GIAS01	TSA	INV	2019-11-06T00:00:00Z
Archivesica marissinica	2291877	1544610695	4005	JABXNX01	WGS	INV	2020-10-07T00:00:00Z
Archocentrus centrarchus	63155	932947025	189	STFV01	WGS	VRT	2021-08-11T00:00:00Z
Archocentrus centrarchus	63155	1034011644	9292	STFW01	WGS	VRT	2021-08-11T00:00:00Z
Archon apollinus	213896	739520005	679950	DWIA01	WGS	INV	2022-02-17T00:00:00Z
Archytas apicifer	1473610	35048721	30600	GIHO01	TSA	INV	2022-08-30T00:00:00Z
Arctia plantaginis	874455	584648222	1071	CADEBC01	WGS	INV	2020-04-10T00:00:00Z
Arctia plantaginis	874455	577993050	1050	CADEBD01	WGS	INV	2020-04-10T00:00:00Z
Arctia plantaginis	874455	98605007	199140	GGLW01	TSA	INV	2018-04-26T00:00:00Z
Arctium lappa	4217	1727363248	299	JAKOEK01	WGS	PLN	2022-05-24T00:00:00Z
Arctocephalus gazella	37190	2313485084	6169	UIRR01	WGS	MAM	2018-08-19T00:00:00Z
Arctocephalus gazella	37190	2313585684	5180	CAAAJK01	WGS	MAM	2019-01-16T00:00:00Z
Arctocephalus townsendi	161921	2372365934	238431	JAQQSM01	WGS	MAM	2023-02-16T00:00:00Z
Arctogadus glacialis	185735	428791846	139389	OMOA01	WGS	VRT	2018-03-09T00:00:00Z
Arctopsyche grandis	121162	483112428	614	JARCGT01	WGS	INV	2023-05-08T00:00:00Z
Arctopsyche palpata	1661814	24256881	25884	GDUF01	TSA	INV	2019-11-05T00:00:00Z
Arctosa depectinata	2337300	50186501	38314	IBNE01	TSA	INV	2022-11-17T00:00:00Z
Arctosa depectinata	2337300	46284996	37635	ICKM01	TSA	INV	2022-11-17T00:00:00Z
Arctosa ebicha	332771	62428731	40970	ICGR01	TSA	INV	2022-11-17T00:00:00Z
Arctosa fujiii	2337301	50344328	38885	IBPX01	TSA	INV	2022-11-17T00:00:00Z
Arctosa fujiii	2337301	60434760	40551	ICCA01	TSA	INV	2022-11-17T00:00:00Z
Arctosa ipsa	795142	52821315	40684	IBTU01	TSA	INV	2022-11-17T00:00:00Z
Arctosa ipsa	795142	38055139	37919	IBYV01	TSA	INV	2022-11-17T00:00:00Z
Arctosa kawabe	2337302	49189257	29620	IAMK01	TSA	INV	2022-11-17T00:00:00Z
Arctosa laminata	330954	51317328	38465	ICCP01	TSA	INV	2022-11-17T00:00:00Z
Arctosa stigmosa	332775	53957361	38703	IARN01	TSA	INV	2022-11-17T00:00:00Z
Arctostaphylos glauca	89197	547665946	272	JAHSPW02	WGS	PLN	2022-02-20T00:00:00Z
Arctostaphylos glauca	89197	556397040	2350	JAHSPX01	WGS	PLN	2021-09-14T00:00:00Z
Arctotanais alascensis	1003057	50151567	36905	GJCM01	TSA	INV	2021-11-29T00:00:00Z
Arcuphantes paiki	2337303	69644966	42181	IAWN01	TSA	INV	2022-11-17T00:00:00Z
Arcuphantes sp. IDV 7058	2337304	56170578	41980	IAJT01	TSA	INV	2022-11-17T00:00:00Z
Arcuphantes tamaensis	2337305	73169760	46269	IAKU01	TSA	INV	2022-11-17T00:00:00Z
Arcuphantes uenoi	2337306	79008270	44397	IBBK01	TSA	INV	2022-11-17T00:00:00Z
Arcynopteryx dichroa	2662712	100103211	79305	GIEK01	TSA	INV	2020-11-04T00:00:00Z
Ardaris aerata	2585983	44713524	148487	DWLC01	WGS	INV	2022-02-17T00:00:00Z
Ardaris eximia	2585984	169749921	459123	DWFX01	WGS	INV	2022-02-17T00:00:00Z
Ardaris minthe	2585985	361748876	246510	DWTR01	WGS	INV	2022-02-17T00:00:00Z
Ardaris pityusa	2585986	150912934	419002	DWSA01	WGS	INV	2022-02-17T00:00:00Z
Ardaris sela periphema	2585988	355536568	253263	DWTQ01	WGS	INV	2022-02-17T00:00:00Z
Ardaris sela sela	2585989	210318303	528192	DWFZ01	WGS	INV	2022-02-17T00:00:00Z
Ardeotis arabs	172690	1297600582	148690	JAAGAY01	WGS	VRT	2020-03-31T00:00:00Z
Ardeotis kori	89386	1150486959	9399	VWPR01	WGS	VRT	2020-07-10T00:00:00Z
Ardisia crenata	13345	75258053	52194	GJZC01	TSA	PLN	2022-06-14T00:00:00Z
Areca catechu	184783	163020148	123914	GHKR01	TSA	PLN	2019-05-13T00:00:00Z
Areca catechu	184783	2823079964	73	JAHSVC01	WGS	PLN	2022-01-11T00:00:00Z
Arenaria interpres	54971	1124618860	46803	VXAK01	WGS	VRT	2020-07-10T00:00:00Z
Arenicola marina	6344	73701071	41555	GJHO01	TSA	INV	2021-08-30T00:00:00Z
Aretaon asperrimus	173775	164570961	142119	GAWC01	TSA	INV	2020-06-03T00:00:00Z
Aretaon asperrimus	173775	38301498	45083	GAZQ02	TSA	INV	2016-02-17T00:00:00Z
Argania spinosa	85884	690465237	186325	QLOD02	WGS	PLN	2023-01-30T00:00:00Z
Arge berberidis	1384767	29450712	22277	GBPH01	TSA	INV	2017-03-24T00:00:00Z
Argemone mexicana	54796	86016038	97469	GJVJ01	TSA	PLN	2022-09-28T00:00:00Z
Argentina silus	446415	550403860	4805	CATOGY01	WGS	VRT	2023-05-26T00:00:00Z
Argentina silus	446415	51484779	999	CATOHB01	WGS	VRT	2023-05-26T00:00:00Z
Argia fumipennis	663471	24227351	29767	GCKK01	TSA	INV	2022-03-09T00:00:00Z
Argiope aemula	332528	45967349	37818	IBUT01	TSA	INV	2022-11-17T00:00:00Z
Argiope aemula	332528	49273186	38144	IBYN01	TSA	INV	2022-11-17T00:00:00Z
Argiope aetheroides	716551	44432728	37453	IAFW01	TSA	INV	2022-11-17T00:00:00Z
Argiope aetheroides	716551	67087144	41466	IASB01	TSA	INV	2022-11-17T00:00:00Z
Argiope amoena	216270	56158087	38019	IARG01	TSA	INV	2022-11-17T00:00:00Z
Argiope amoena	216270	41644354	35601	IBJB01	TSA	INV	2022-11-17T00:00:00Z
Argiope argentata	233271	1900530625	53534	JAOUZG01	WGS	INV	2022-11-22T00:00:00Z
Argiope argentata	233271	83218441	115486	GIWY01	TSA	INV	2021-06-04T00:00:00Z
Argiope aurantia	156844	1837999575	126021	JAPMOR01	WGS	INV	2022-11-30T00:00:00Z
Argiope boesenbergi	216266	51427903	38025	IAEK01	TSA	INV	2022-11-17T00:00:00Z
Argiope bruennichi	94029	1153969	16	CANOBD01	WGS	INV	2022-12-13T00:00:00Z
Argiope bruennichi	94029	1154163902	1789	CANOBE01	WGS	INV	2022-12-13T00:00:00Z
Argiope bruennichi	94029	59563807	39192	IBFJ01	TSA	INV	2022-11-17T00:00:00Z
Argiope bruennichi	94029	47280374	38080	IBPC01	TSA	INV	2022-11-17T00:00:00Z
Argiope bruennichi	94029	1670285661	2231	JABXBU01	WGS	INV	2020-11-16T00:00:00Z
Argiope keyserlingi	332532	61188616	40771	IAET01	TSA	INV	2022-11-17T00:00:00Z
Argiope keyserlingi	332532	58473680	39458	ICAF01	TSA	INV	2022-11-17T00:00:00Z
Argiope minuta	716549	47400474	35929	ICGZ01	TSA	INV	2022-11-17T00:00:00Z
Argiope ocula	716557	49511821	38484	IAMQ01	TSA	INV	2022-11-17T00:00:00Z
Argiope ocula	716557	42468269	35721	ICDW01	TSA	INV	2022-11-17T00:00:00Z
Argiope sp. IDV 2158	2337307	61156719	40316	IBEL01	TSA	INV	2022-11-17T00:00:00Z
Argiope sp. IDV 4916	2337308	64077853	42488	IBUE01	TSA	INV	2022-11-17T00:00:00Z
Argiope sp. IDV 4992	2337309	73183954	45491	IAPK01	TSA	INV	2022-11-17T00:00:00Z
Argiope trifasciata	156845	1879695942	68186	JAPMOQ01	WGS	INV	2022-11-30T00:00:00Z
Argochrysis armilla	1317734	84952495	40467	GAXO01	TSA	INV	2014-03-20T00:00:00Z
Argopecten irradians	31199	179331130	102798	GJDP01	TSA	INV	2022-01-04T00:00:00Z
Argopecten irradians concentricus	158586	874784041	82208	SAYQ01	WGS	INV	2019-03-26T00:00:00Z
Argopecten irradians irradians	158587	835595382	77685	SAYR01	WGS	INV	2019-03-26T00:00:00Z
Argulus foliaceus	509924	144671254	135673	HBDT01	TSA	INV	2021-01-25T00:00:00Z
Argulus siamensis	1167309	1479016886	282594	GHJM01	TSA	INV	2023-04-14T00:00:00Z
Argyresthia goedartella	572725	1055811840	1378	CATKWF01	WGS	INV	2023-04-17T00:00:00Z
Argyresthia goedartella	572725	20190224	60	CATKWH01	WGS	INV	2023-04-17T00:00:00Z
Argyrodes bonadea	1529479	65200201	44431	IAHN01	TSA	INV	2022-11-17T00:00:00Z
Argyrodes bonadea	1529479	42046930	38999	IAKQ01	TSA	INV	2022-11-17T00:00:00Z
Argyrodes bonadea	1529479	73131273	47244	IAMV01	TSA	INV	2022-11-17T00:00:00Z
Argyrodes bonadea	1529479	62372302	44368	ICHX01	TSA	INV	2022-11-17T00:00:00Z
Argyrodes cylindratus	1529480	36820732	40358	IAQT01	TSA	INV	2022-11-17T00:00:00Z
Argyrodes cylindratus	1529480	51321479	43369	IBIQ01	TSA	INV	2022-11-17T00:00:00Z
Argyrodes flavescens	202203	55390691	41614	IAFU01	TSA	INV	2022-11-17T00:00:00Z
Argyrodes flavescens	202203	45237376	39161	IBLB01	TSA	INV	2022-11-17T00:00:00Z
Argyrodes flavescens	202203	46930651	39329	IBRD01	TSA	INV	2022-11-17T00:00:00Z
Argyrodes flavescens	202203	40841451	38974	IBUY01	TSA	INV	2022-11-17T00:00:00Z
Argyrodes flavescens	202203	49844551	39070	IBVQ01	TSA	INV	2022-11-17T00:00:00Z
Argyrodes kumadai	1529484	52595715	41026	IASL01	TSA	INV	2022-11-17T00:00:00Z
Argyrodes kumadai	1529484	53190241	40728	IATA01	TSA	INV	2022-11-17T00:00:00Z
Argyrodes kumadai	1529484	53253826	41581	IBBR01	TSA	INV	2022-11-17T00:00:00Z
Argyrodes miniaceus	1529486	59597284	40119	IBQT01	TSA	INV	2022-11-17T00:00:00Z
Argyrodes miniaceus	1529486	60221805	40570	ICES01	TSA	INV	2022-11-17T00:00:00Z
Argyrodes nephilae	1529488	42116343	38956	IBFL01	TSA	INV	2022-11-17T00:00:00Z
Argyrodes sp. IDV 5035	2337310	52326241	42555	IBNU01	TSA	INV	2022-11-17T00:00:00Z
Argyrodes sp. IDV 6778	2337311	48904674	38443	IBHI01	TSA	INV	2022-11-17T00:00:00Z
Argyroneta aquatica	375087	208982683	342800	GIWR01	TSA	INV	2020-12-22T00:00:00Z
Argyroneta aquatica	375087	51170227	37153	IBNV01	TSA	INV	2022-11-17T00:00:00Z
Argyrosomus japonicus	448029	791960397	1984	JADEYK01	WGS	VRT	2020-12-02T00:00:00Z
Argyrosomus regius	172269	49819656	850	CAMPSB01	WGS	VRT	2022-12-26T00:00:00Z
Argyrosomus regius	172269	101593036	95945	GFVG01	TSA	VRT	2017-08-28T00:00:00Z
Ariadna lateralis	2337312	60726695	42271	IAFR01	TSA	INV	2022-11-17T00:00:00Z
Ariadna lateralis	2337312	48129340	39147	IBAE01	TSA	INV	2022-11-17T00:00:00Z
Ariadna lateralis	2337312	45425185	37644	IBOP01	TSA	INV	2022-11-17T00:00:00Z
Ariadna lateralis	2337312	45365180	39792	IBSN01	TSA	INV	2022-11-17T00:00:00Z
Ariadna lateralis	2337312	72325982	48699	ICDC01	TSA	INV	2022-11-17T00:00:00Z
Ariamnes cylindrogaster	1112391	46384870	40347	IAHT01	TSA	INV	2022-11-17T00:00:00Z
Ariamnes cylindrogaster	1112391	39993532	38265	IAKP01	TSA	INV	2022-11-17T00:00:00Z
Ariamnes flagellum	2337313	57628360	42844	IASR01	TSA	INV	2022-11-17T00:00:00Z
Ariamnes sp. IDV 6790	2337314	49627269	39762	IAVE01	TSA	INV	2022-11-17T00:00:00Z
Aricia agestis	91739	434242426	248	CAJHUN01	WGS	INV	2021-01-25T00:00:00Z
Aricia agestis	91739	77277	2	CAJHVJ01	WGS	INV	2021-01-25T00:00:00Z
Aricia agestis	91739	433632574	107	CALYBU01	WGS	INV	2022-06-27T00:00:00Z
Aricia agestis	91739	174297	6	CALYBY01	WGS	INV	2022-06-27T00:00:00Z
Aricia artaxerxes	91738	19610	1	CALLYF01	WGS	INV	2022-05-01T00:00:00Z
Aricia artaxerxes	91738	327847811	1192	CALMHP01	WGS	INV	2022-05-01T00:00:00Z
Arilus cristatus	72517	26079491	32594	GCWE01	TSA	INV	2018-11-30T00:00:00Z
Arion vulgaris	1028688	91533740	136407	HACG01	TSA	INV	2017-09-29T00:00:00Z
Arion vulgaris	1028688	1541026261	6751	JADZMA01	WGS	INV	2021-11-08T00:00:00Z
Ariopsis seemanni	243726	1574943420	77516	JAOANJ01	WGS	VRT	2022-11-27T00:00:00Z
Aristolochia californica	171875	661636370	531	JARWKL01	WGS	PLN	2023-05-10T00:00:00Z
Aristolochia californica	171875	633851113	306	JARWKM01	WGS	PLN	2023-05-10T00:00:00Z
Aristolochia contorta	266420	210540771	84	JAHZSQ01	WGS	PLN	2022-03-04T00:00:00Z
[truncated: 20,115 more rows]
